# Supplementary material for: A Facile Approach to Bis(isoxazoles), Promising Ligands of the AMPA Receptor
Source: MDPI journal article supplement (doi:10.3390/molecules26216411), 2021-10-23
Supplement: s1 [file s1]

# Facile approach to bis(isoxazoles) – promising ligands of AMPA receptor

Dmitry A. Vasilenko,<sup>a</sup> Kirill S. Sadovnikov,<sup>a</sup> Kseniya N. Sedenkova,<sup>a</sup> Dmitry S. Karlov,<sup>a</sup> Eugene V. Radchenko,<sup>a</sup> Yuri K. Grishin,<sup>a</sup> Victor B. Rybakov,<sup>a</sup> Tamara S. Kuznetsova,<sup>a</sup> Vladimir L. Zamoyiski,<sup>b</sup> Vladimir V. Grigoriev,<sup>a,b</sup> Vladimir A. Palyulin,<sup>a</sup> Elena B. Averina\*<sup>a</sup>

<sup>a</sup> *Department of Chemistry, Lomonosov Moscow State University, 119991 Moscow, Russian Federation.  
E-mail: elaver@med.chem.msu.ru*

<sup>b</sup> *Institute of Physiologically Active Compounds, Russian Academy of Sciences, 142432 Chernogolovka, Moscow Region, Russian Federation*

## SUPPORTING INFORMATION

### TABLE OF CONTENTS

|                                            |    |
|--------------------------------------------|----|
| 1. Copies of NMR Spectra.....              | 2  |
| 2. X-Ray Data for Compound <b>3c</b> ..... | 43 |

# 1.Copies of NMR Spectra

## Adamantane-1,3-diyl di(methylene) bisacrylate **2g** ( $^1\text{H}$ NMR)

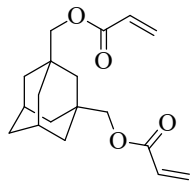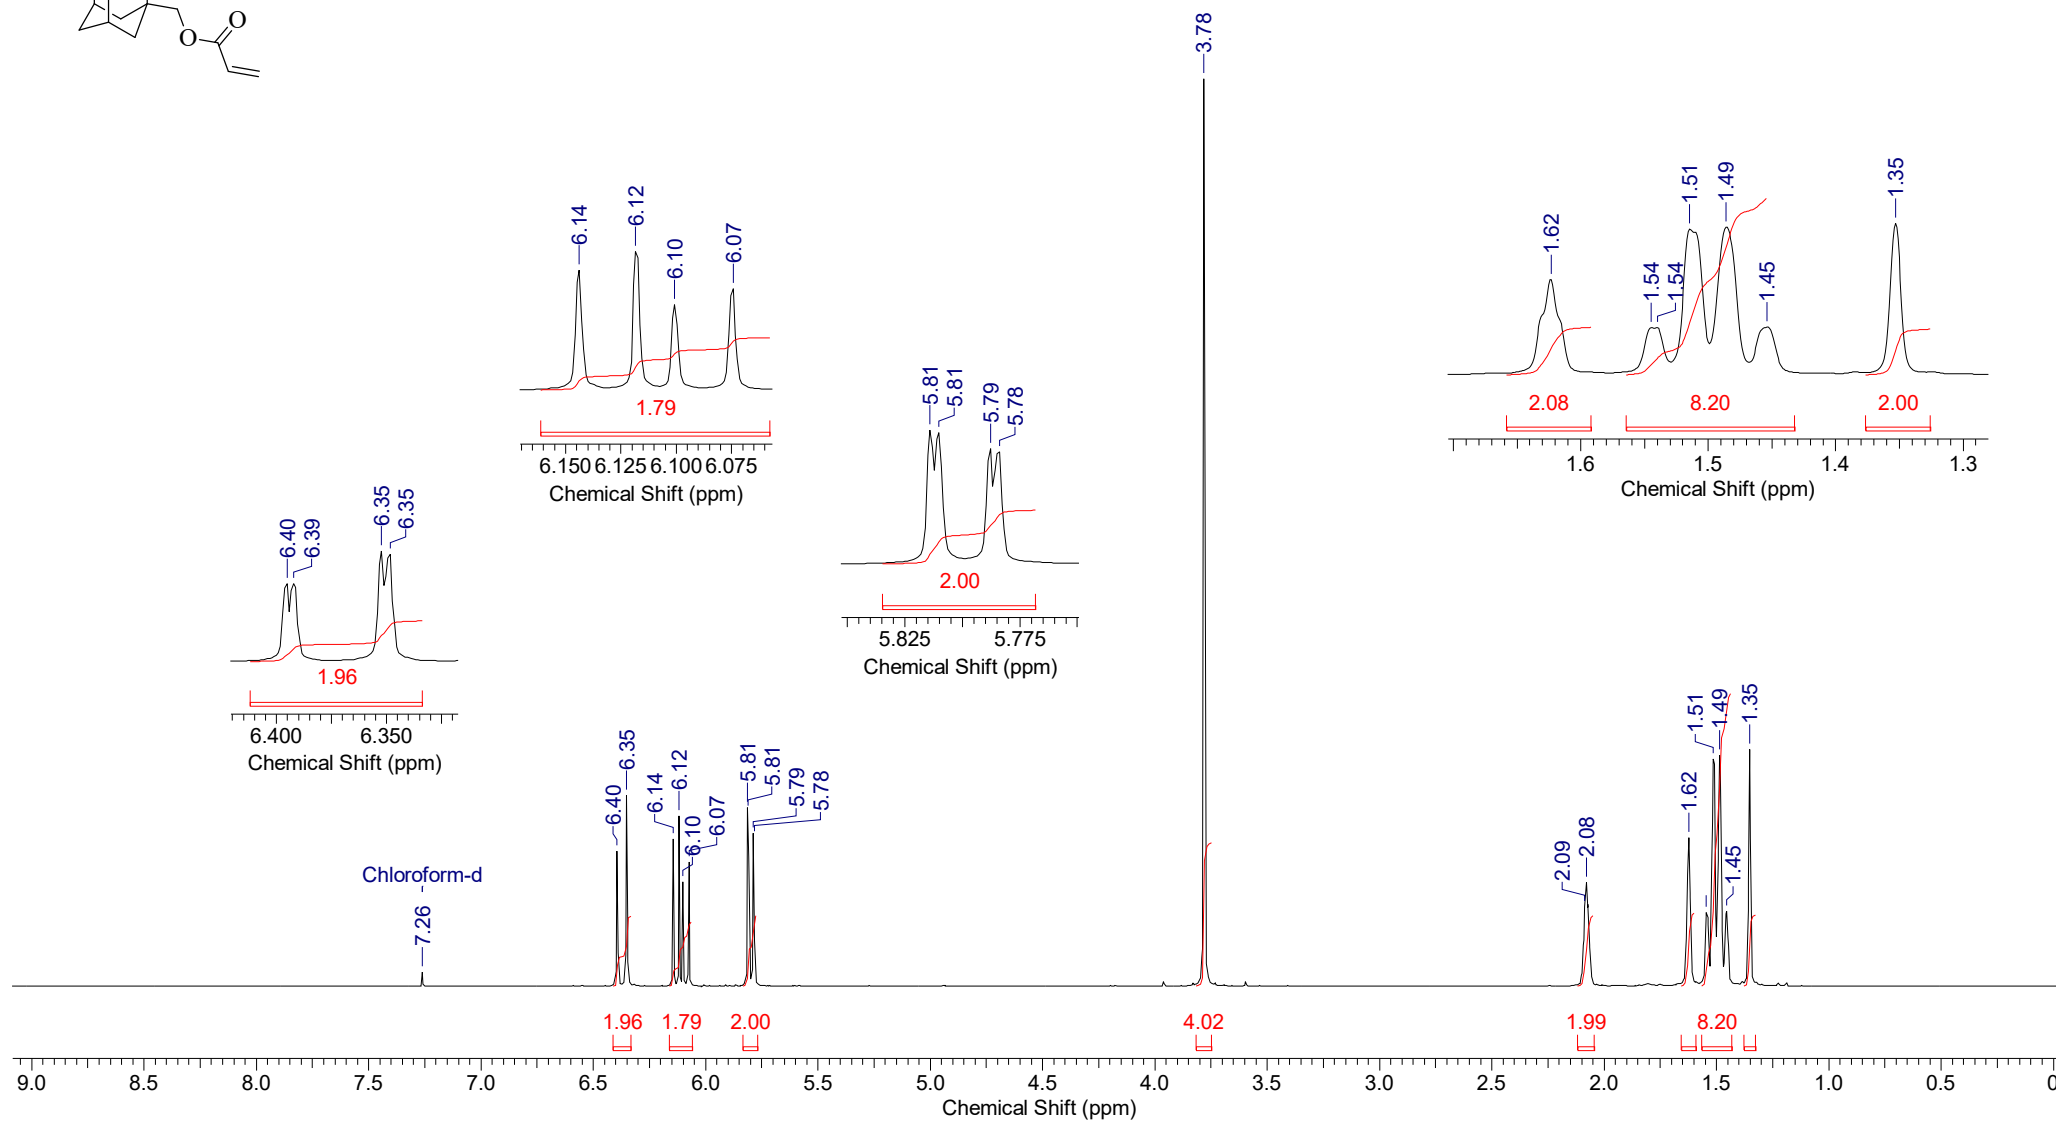

# Adamantane-1,3-diyl di(methylene) bisacrylate **2g** ( $^{13}\text{C}$ NMR)

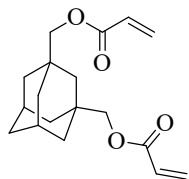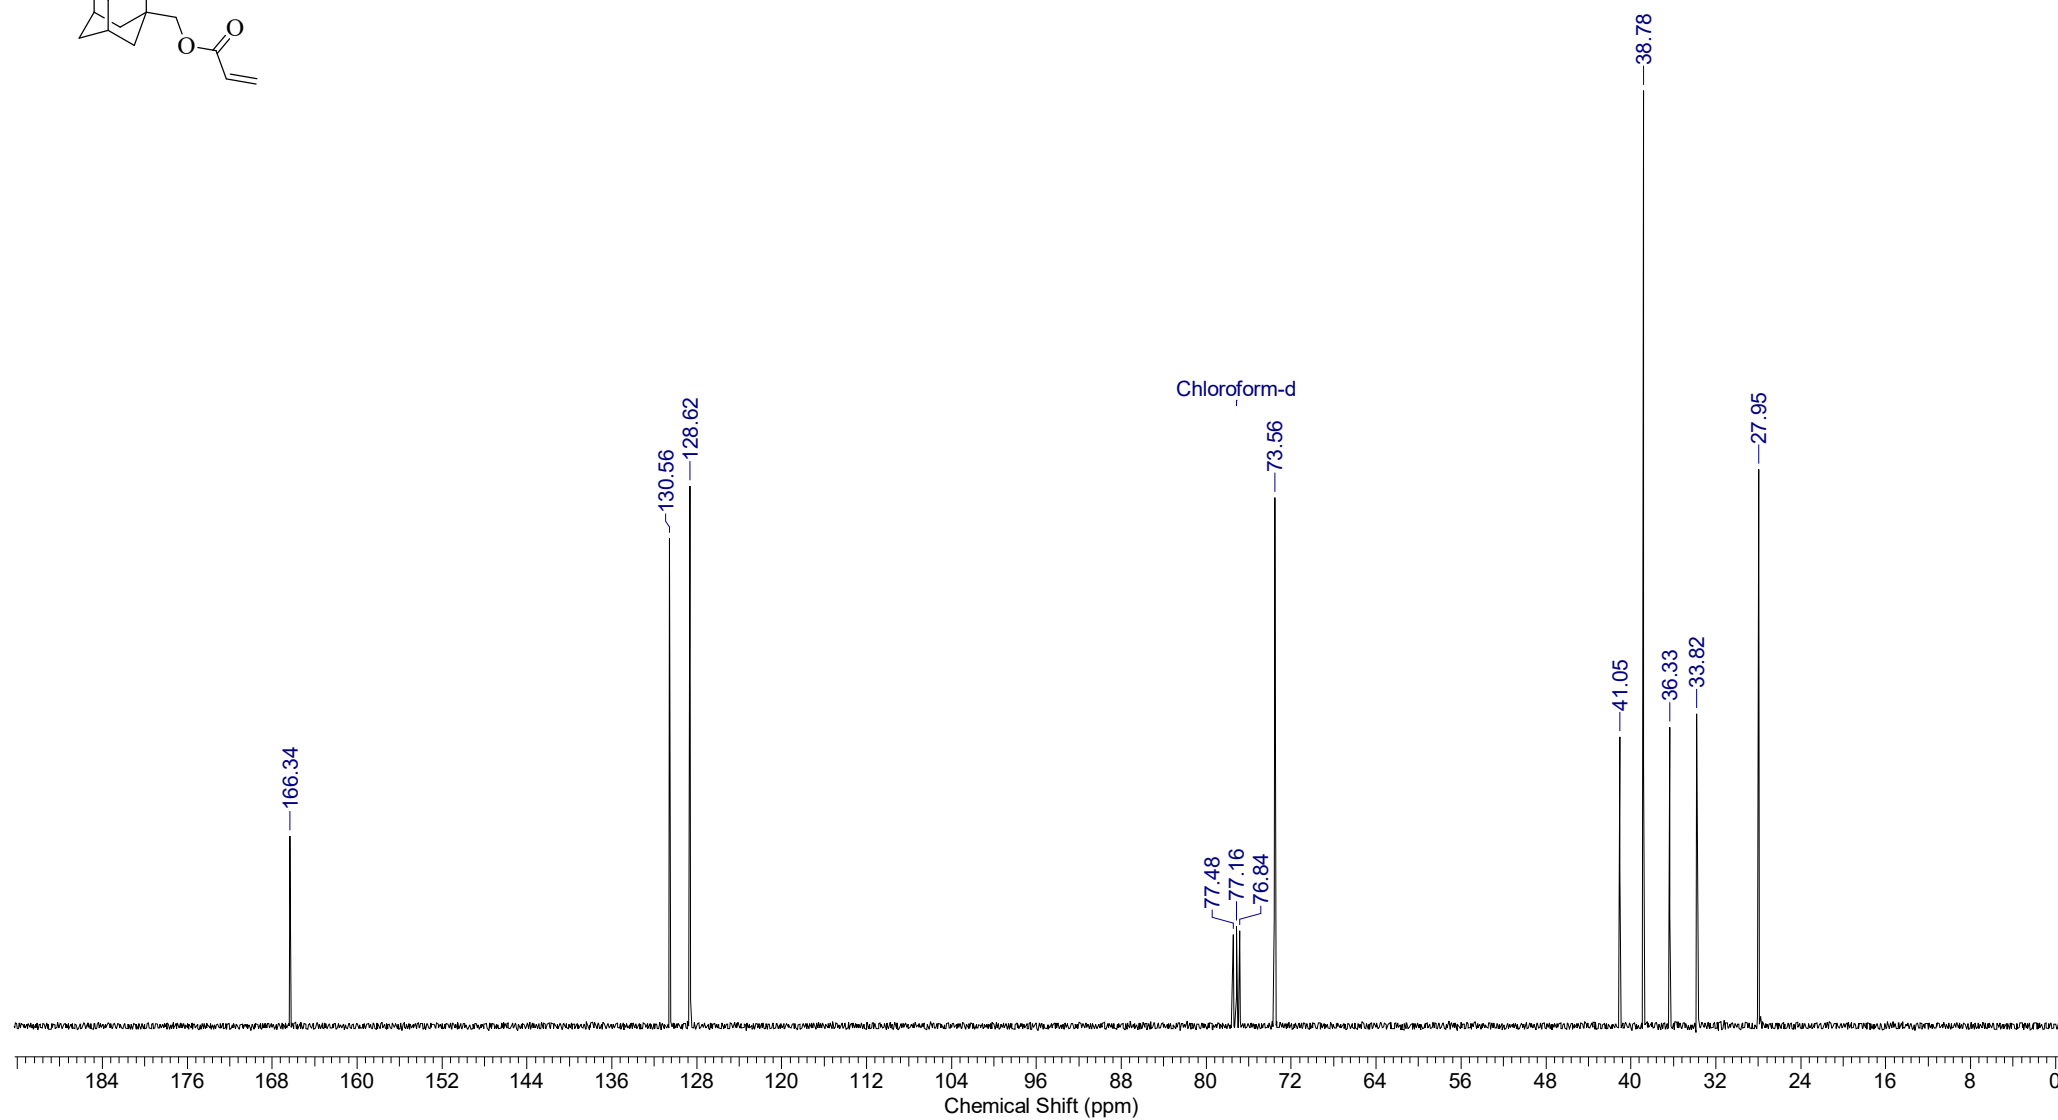

[(3s,7s)-7-(Acryloyloxy)bicyclo[3.3.1]non-3-yl]methyl acrylate **2h** ( $^1\text{H}$  NMR)

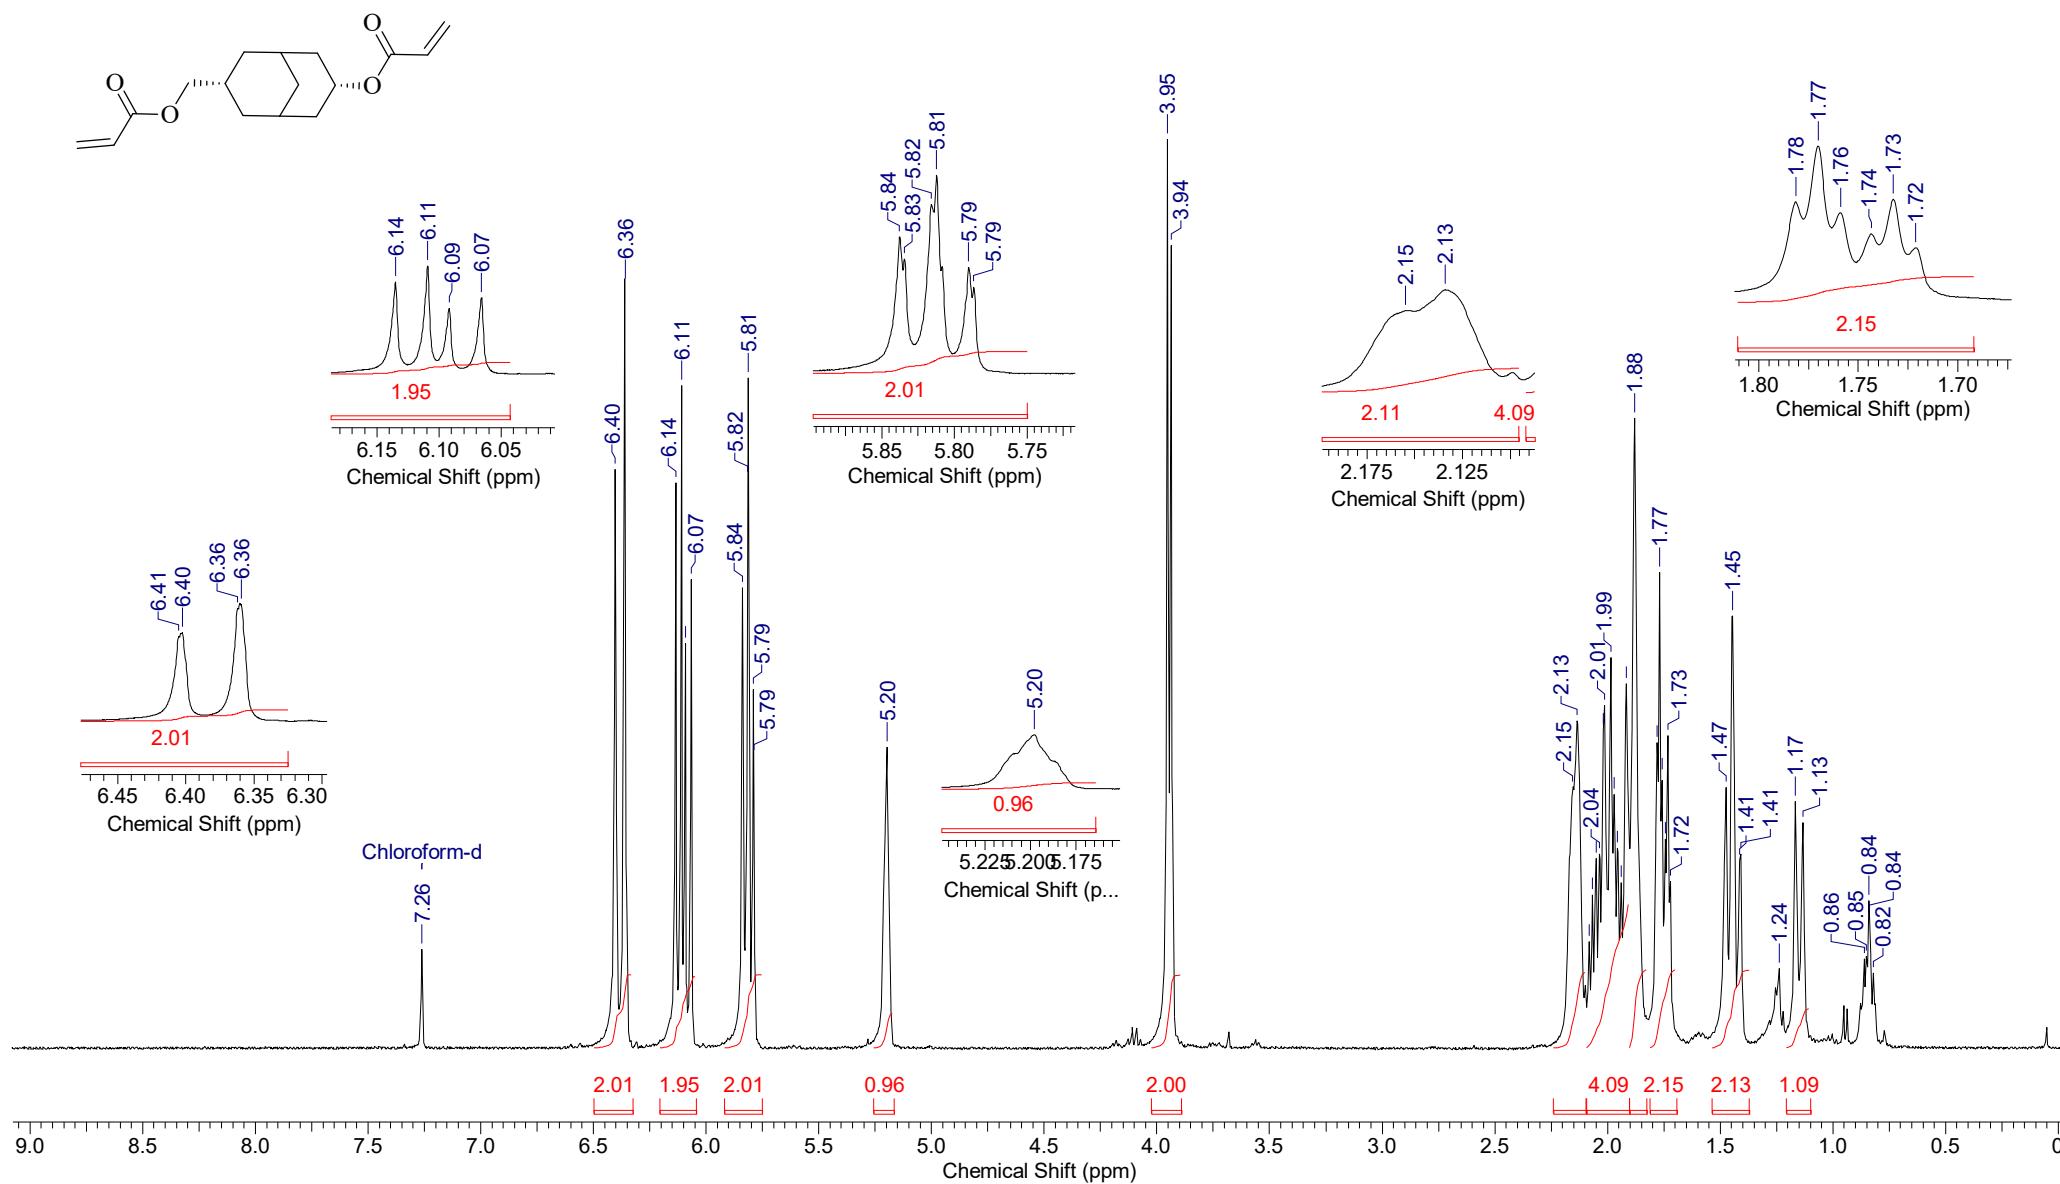

[(3s,7s)-7-(Acryloyloxy)bicyclo[3.3.1]non-3-yl]methyl acrylate **2h** ( $^{13}\text{C}$  NMR)

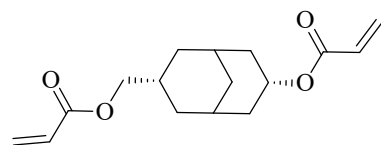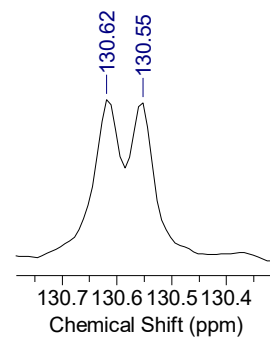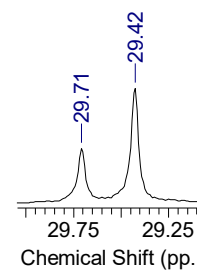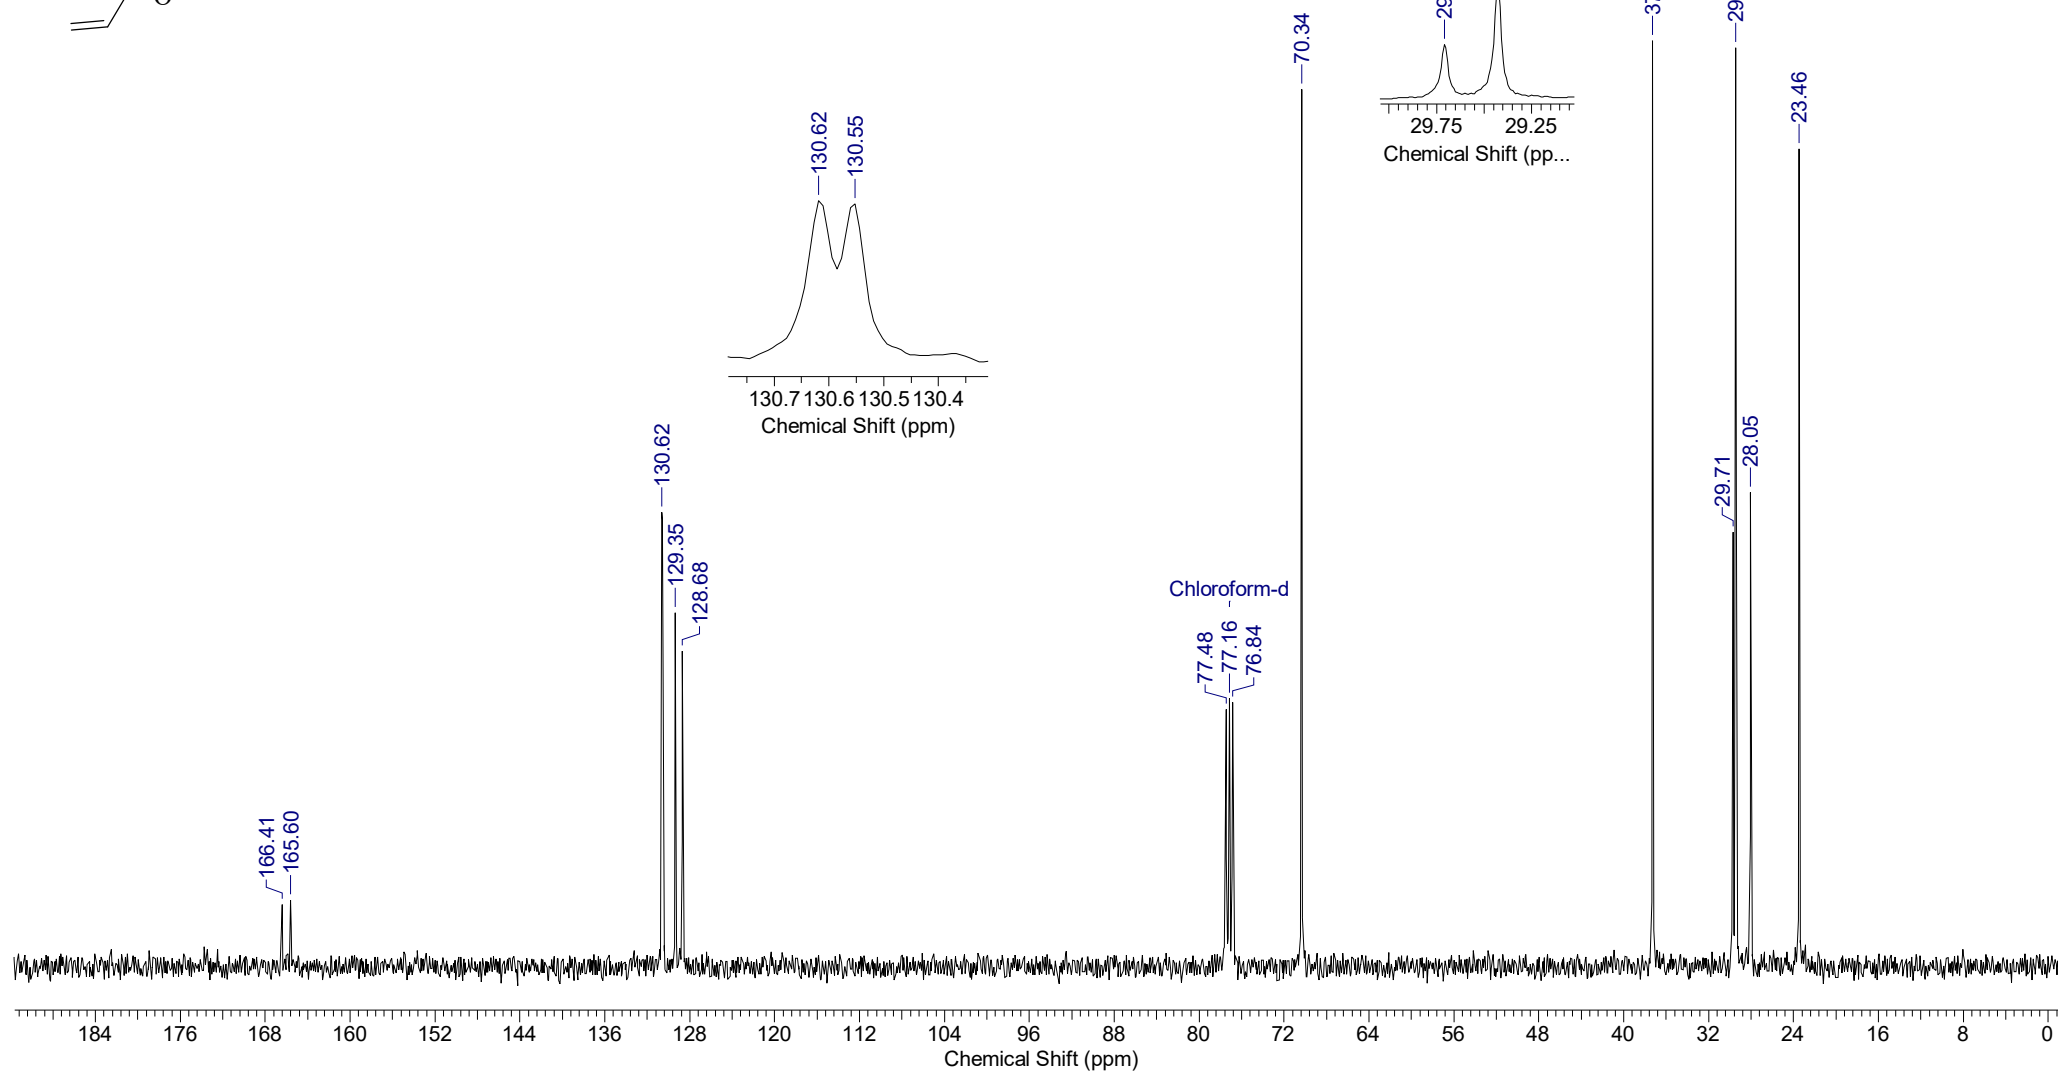

# 4-(Adamantan-1-yl)phenyl acrylate, **2j** ( $^1\text{H}$ NMR)

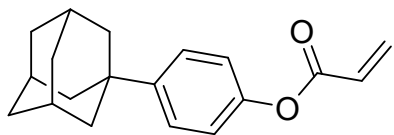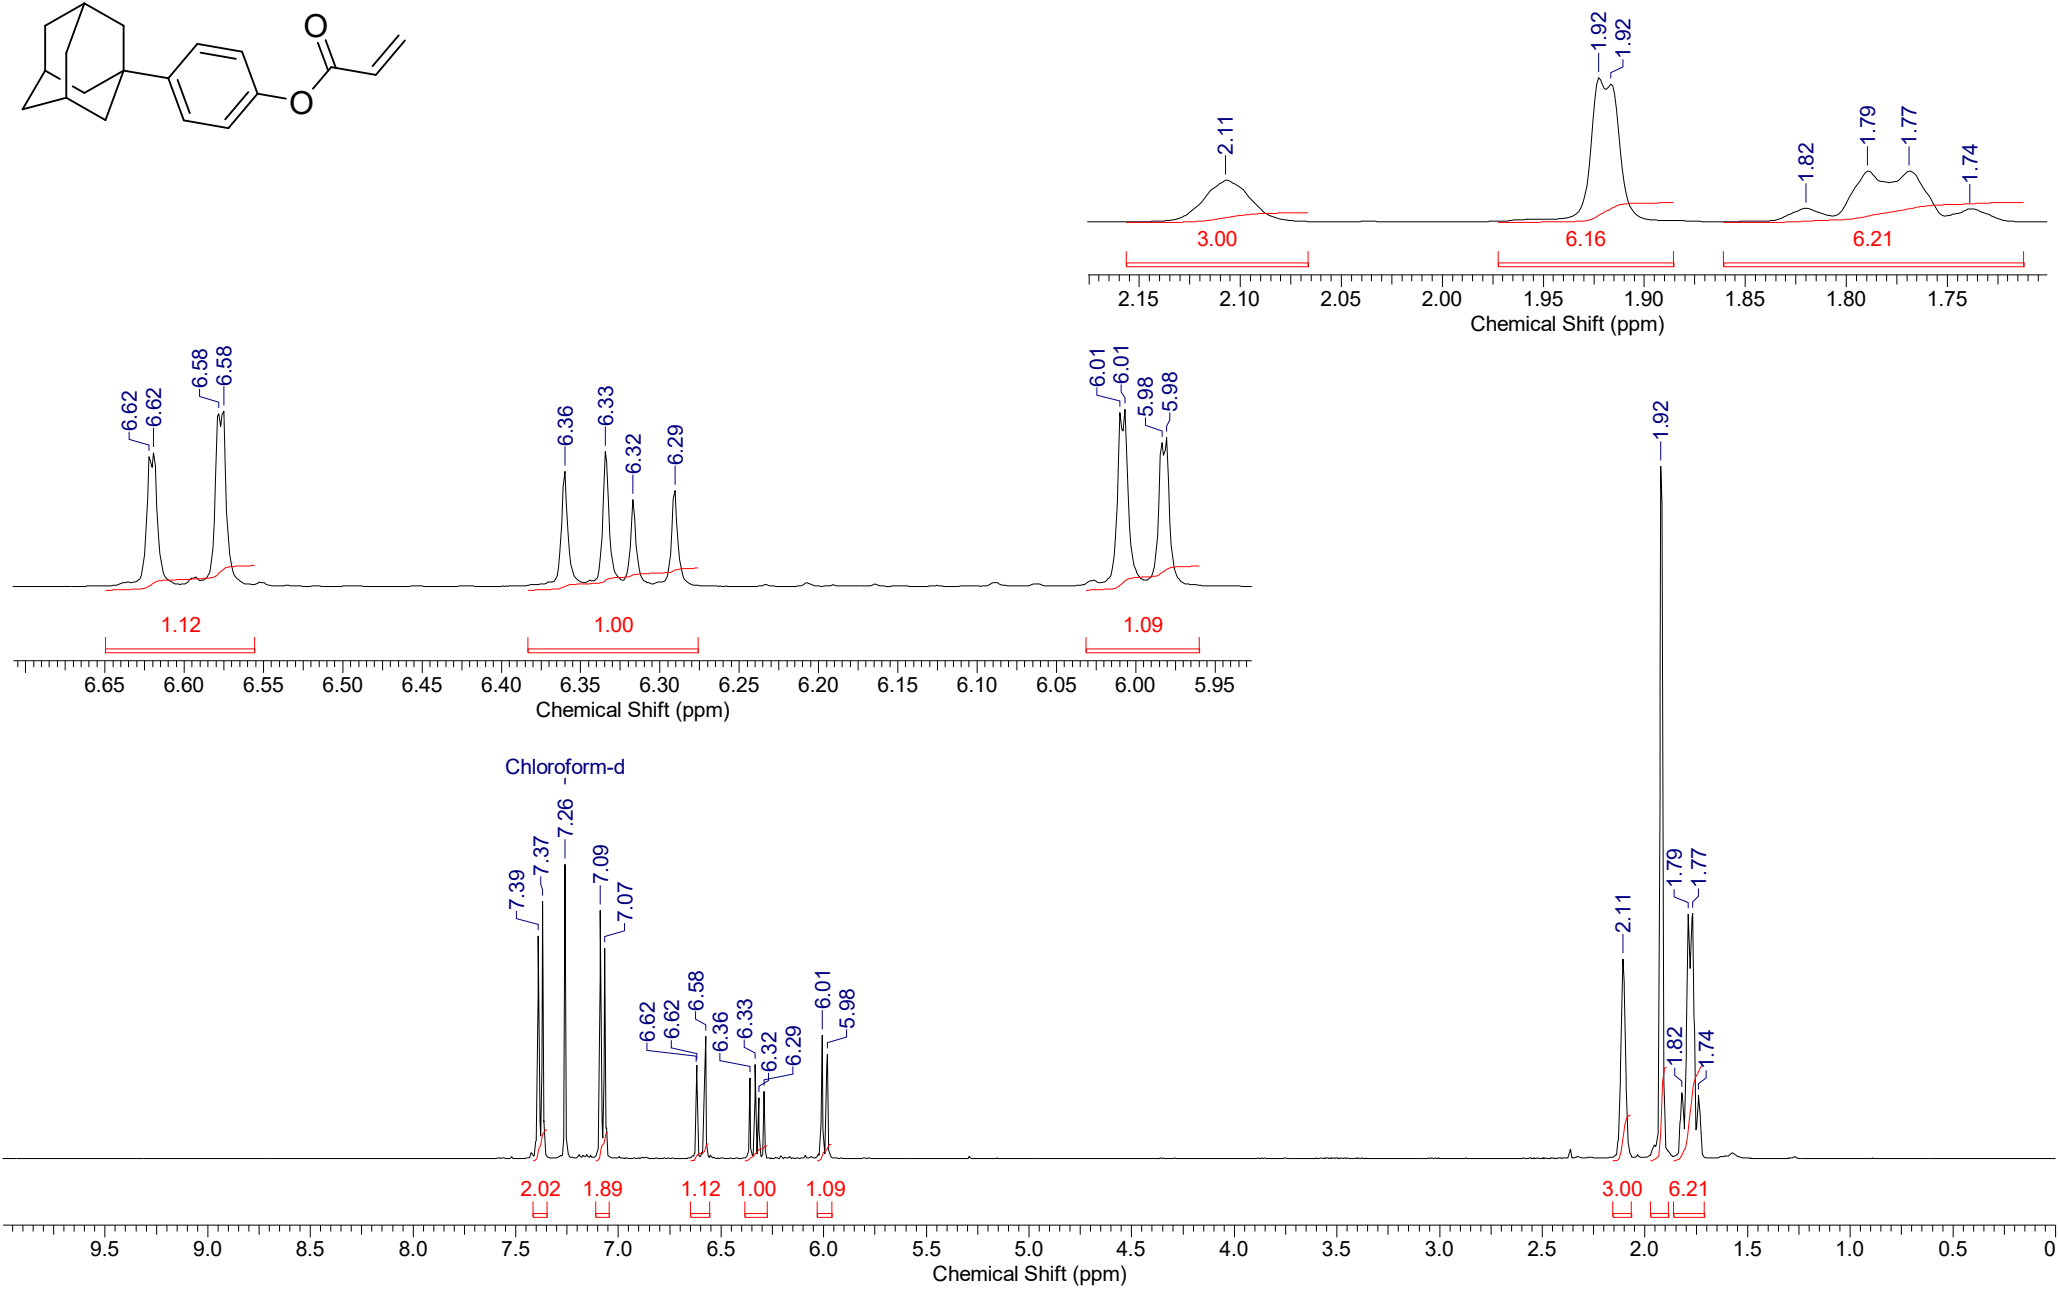

4-(Adamantan-1-yl)phenyl acrylate, **2j** ( $^{13}\text{C}$  NMR)

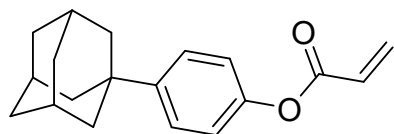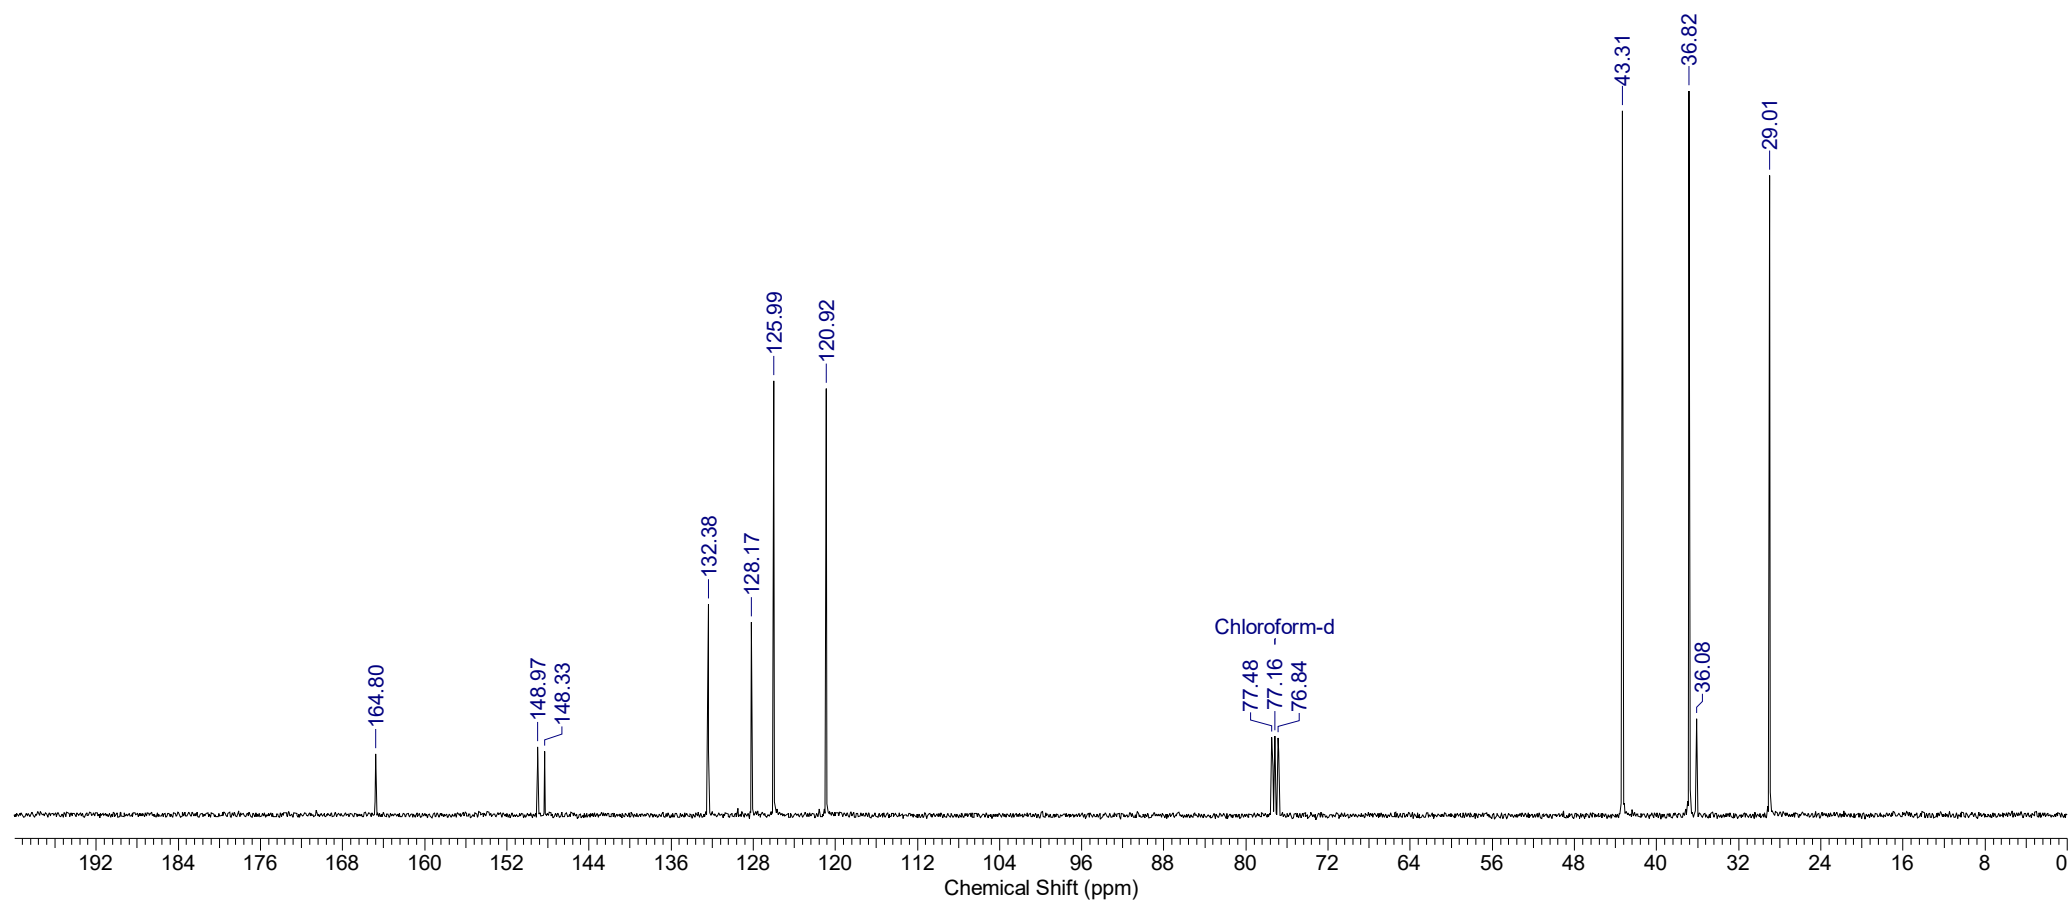

# Ethane-1,2-diyl bis(5-nitroisoxazole-3-carboxylate) **3a** ( $^1\text{H}$ NMR)

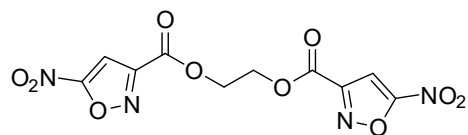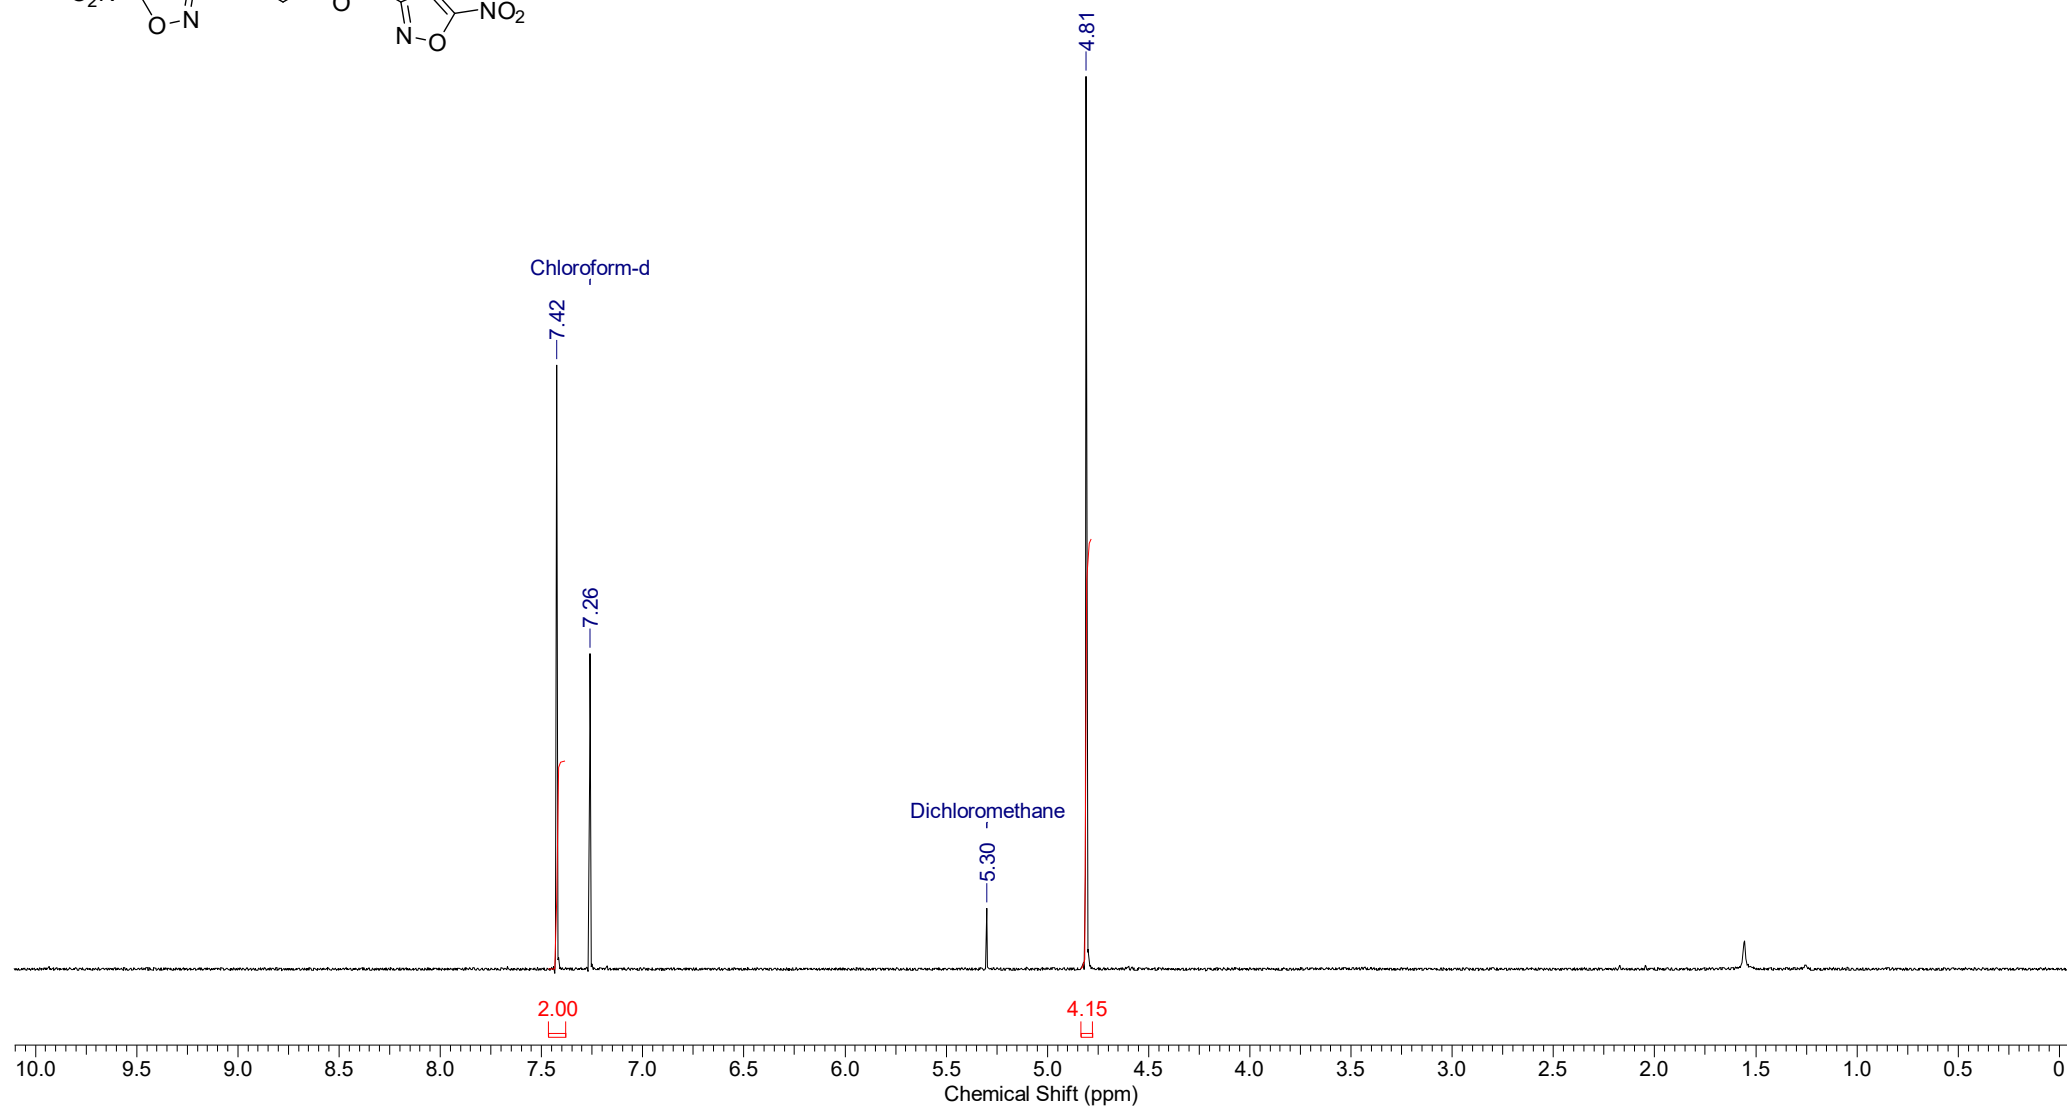



# Ethane-1,2-diyl bis(5-nitroisoxazole-3-carboxylate) **3a** ( $^{13}\text{C}$ NMR)

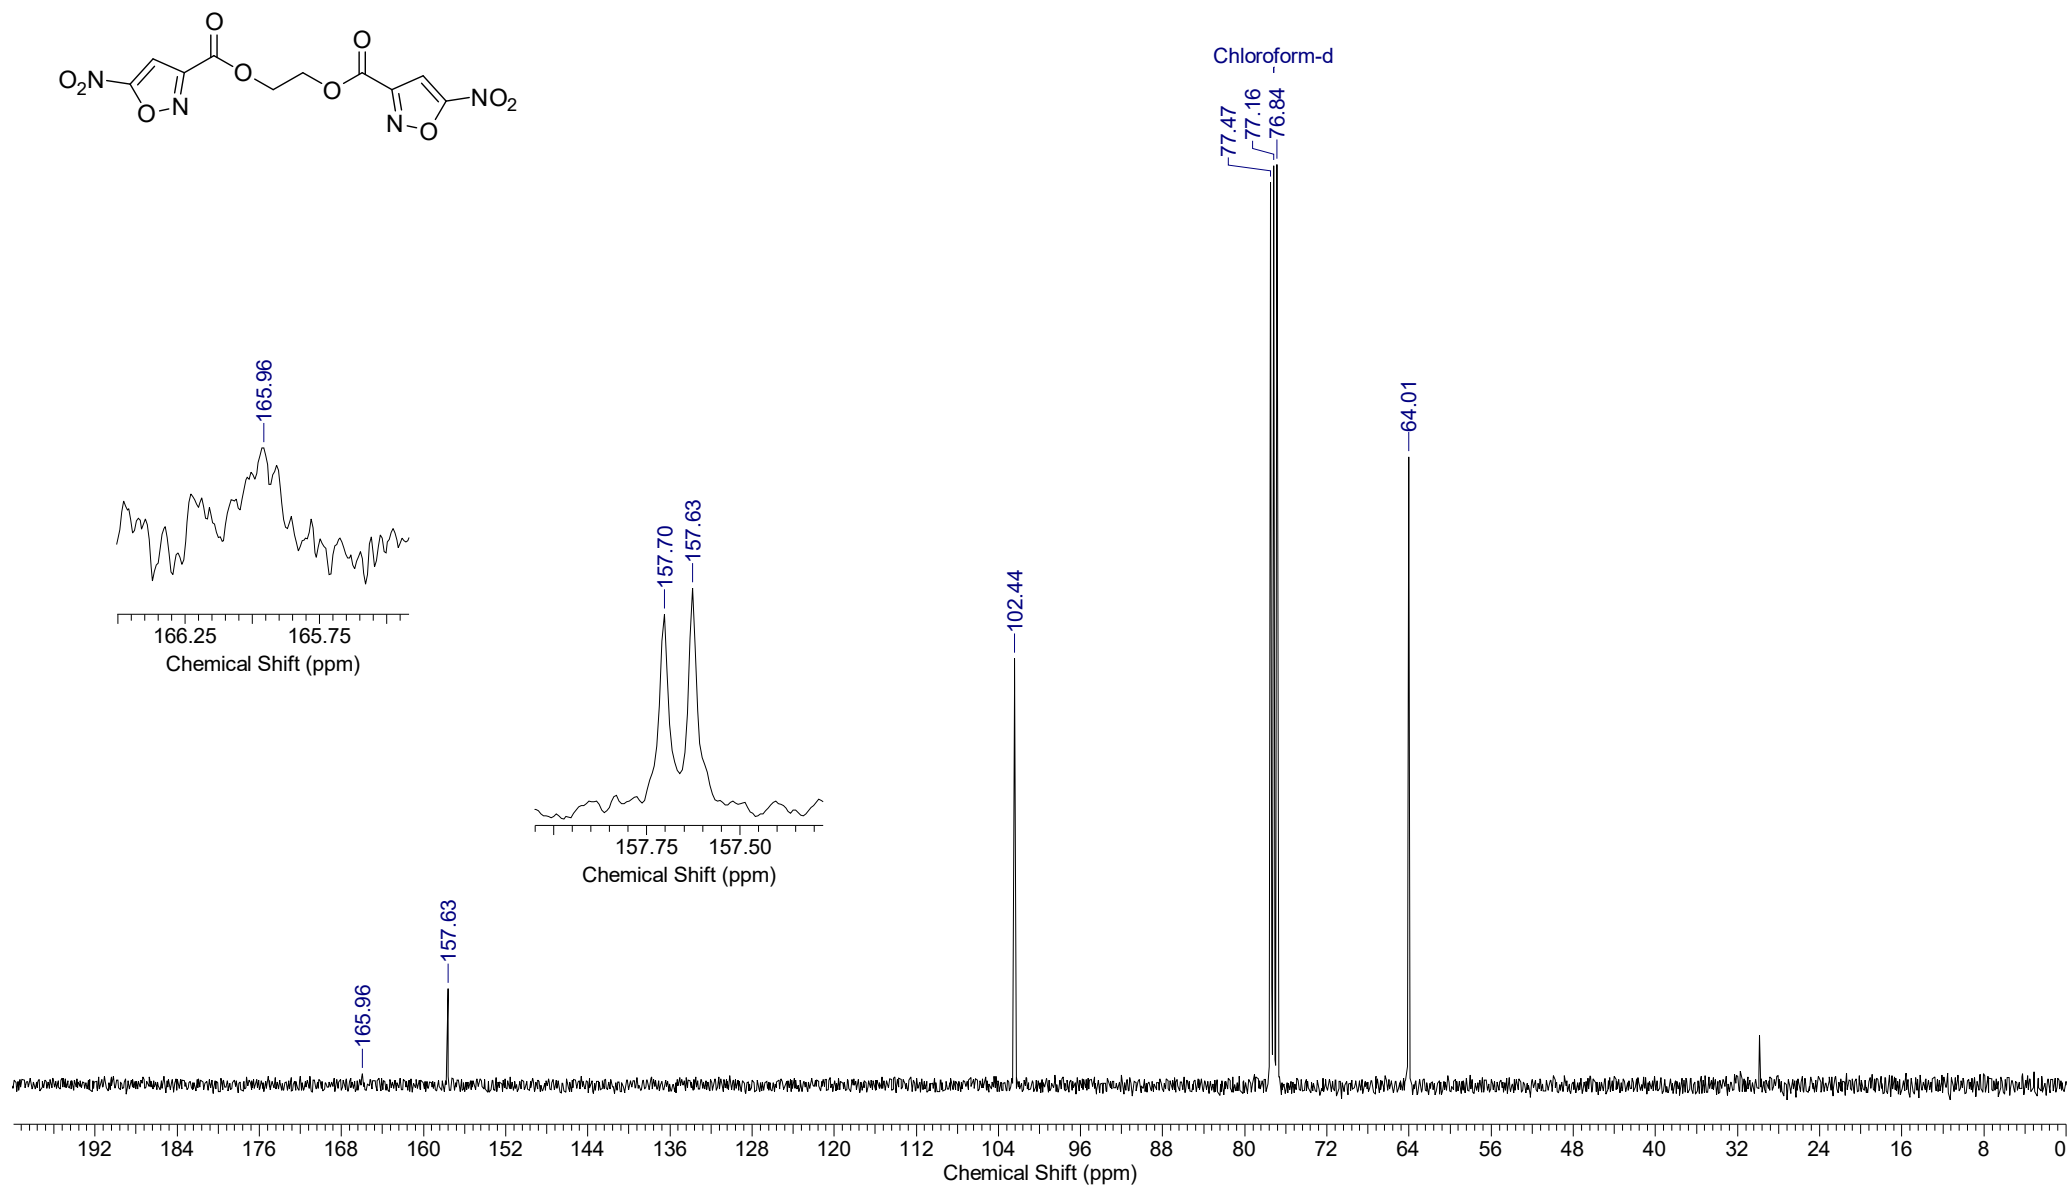

# Propane-1,3-diyl bis(5-nitroisoxazole-3-carboxylate) **3b** ( $^1\text{H}$ NMR)

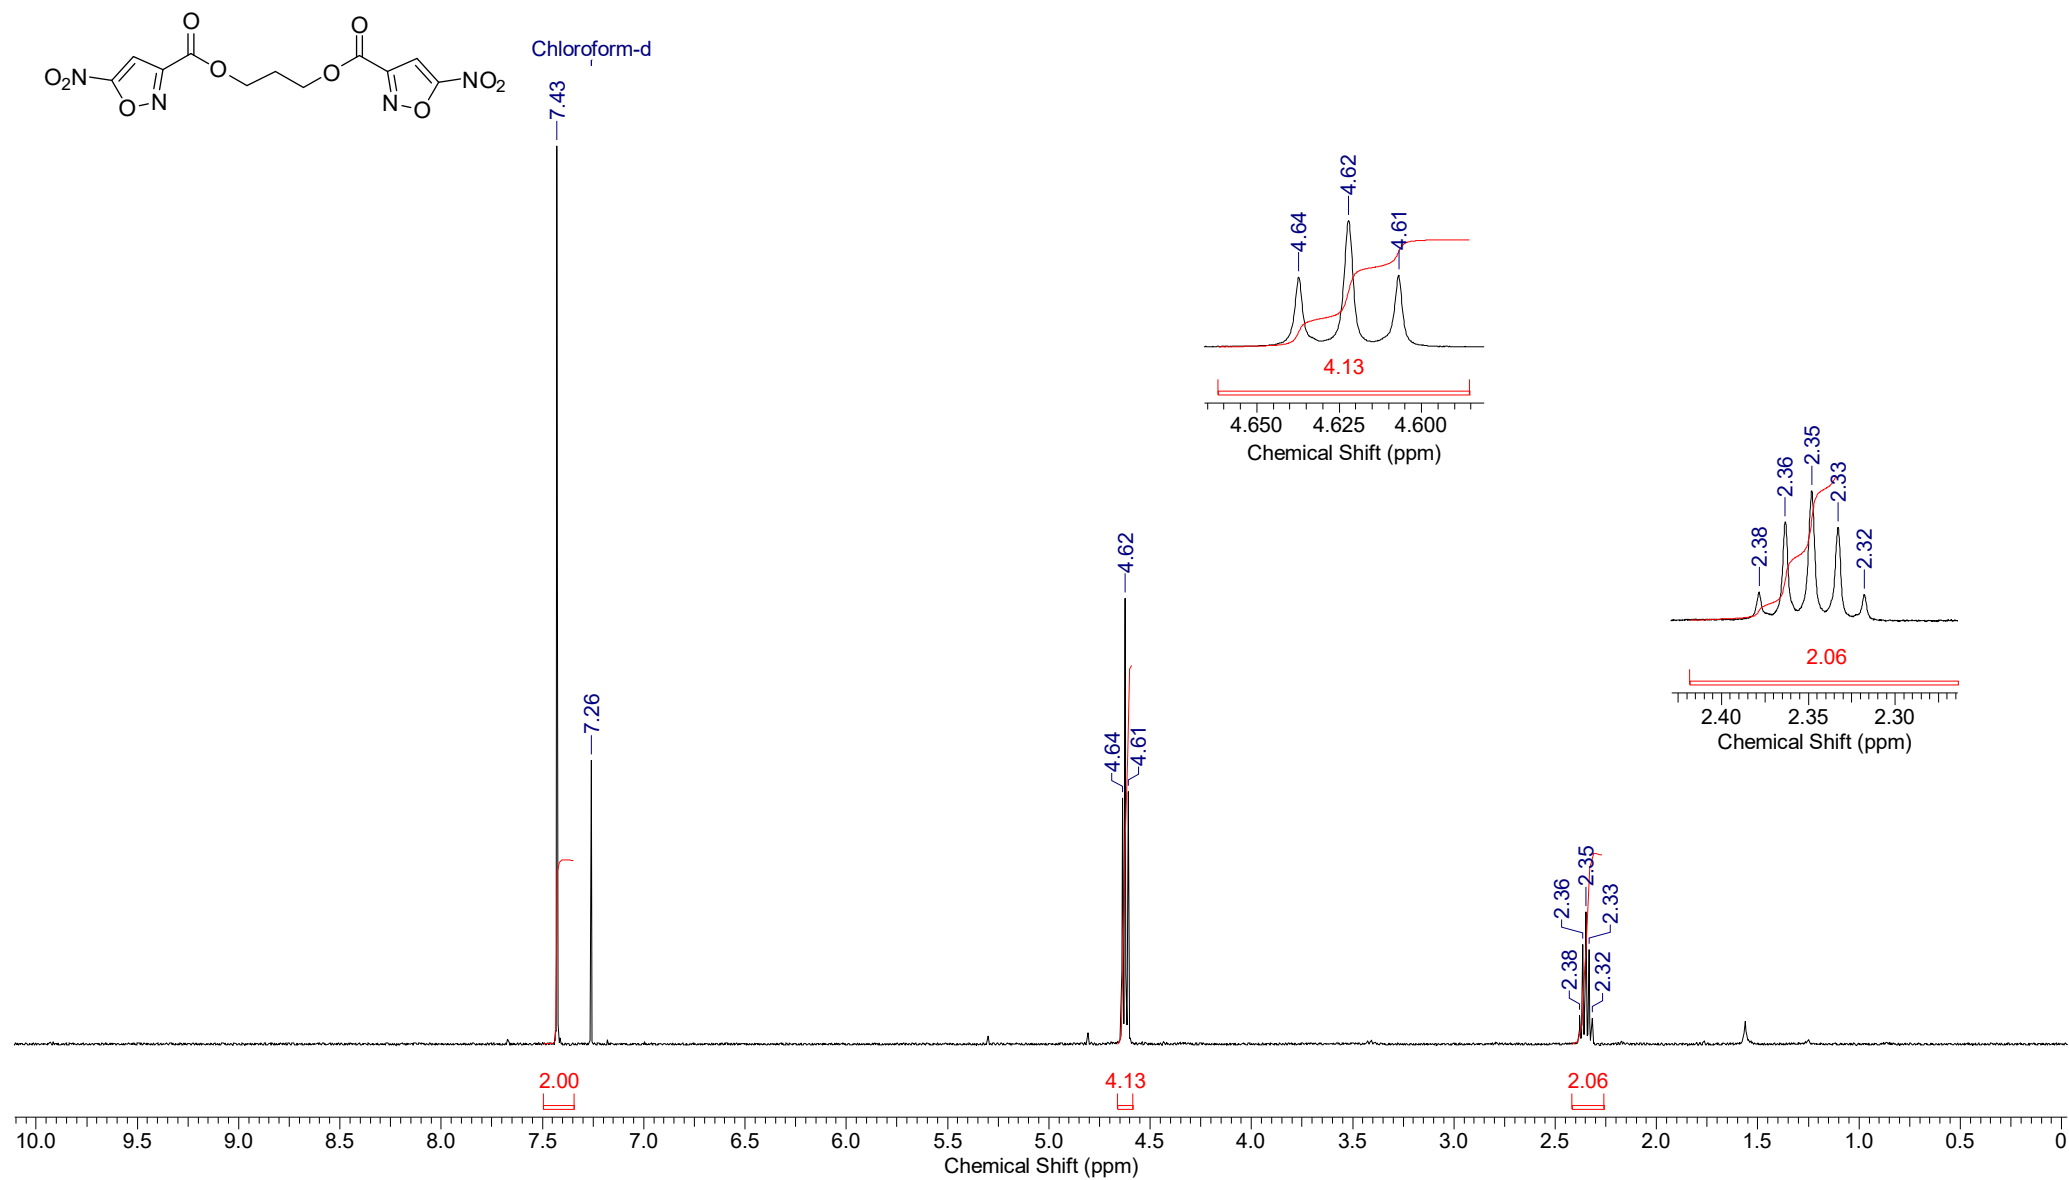

Propane-1,3-diyl bis(5-nitroisoxazole-3-carboxylate) **3b** ( $^{13}\text{C}$  NMR)

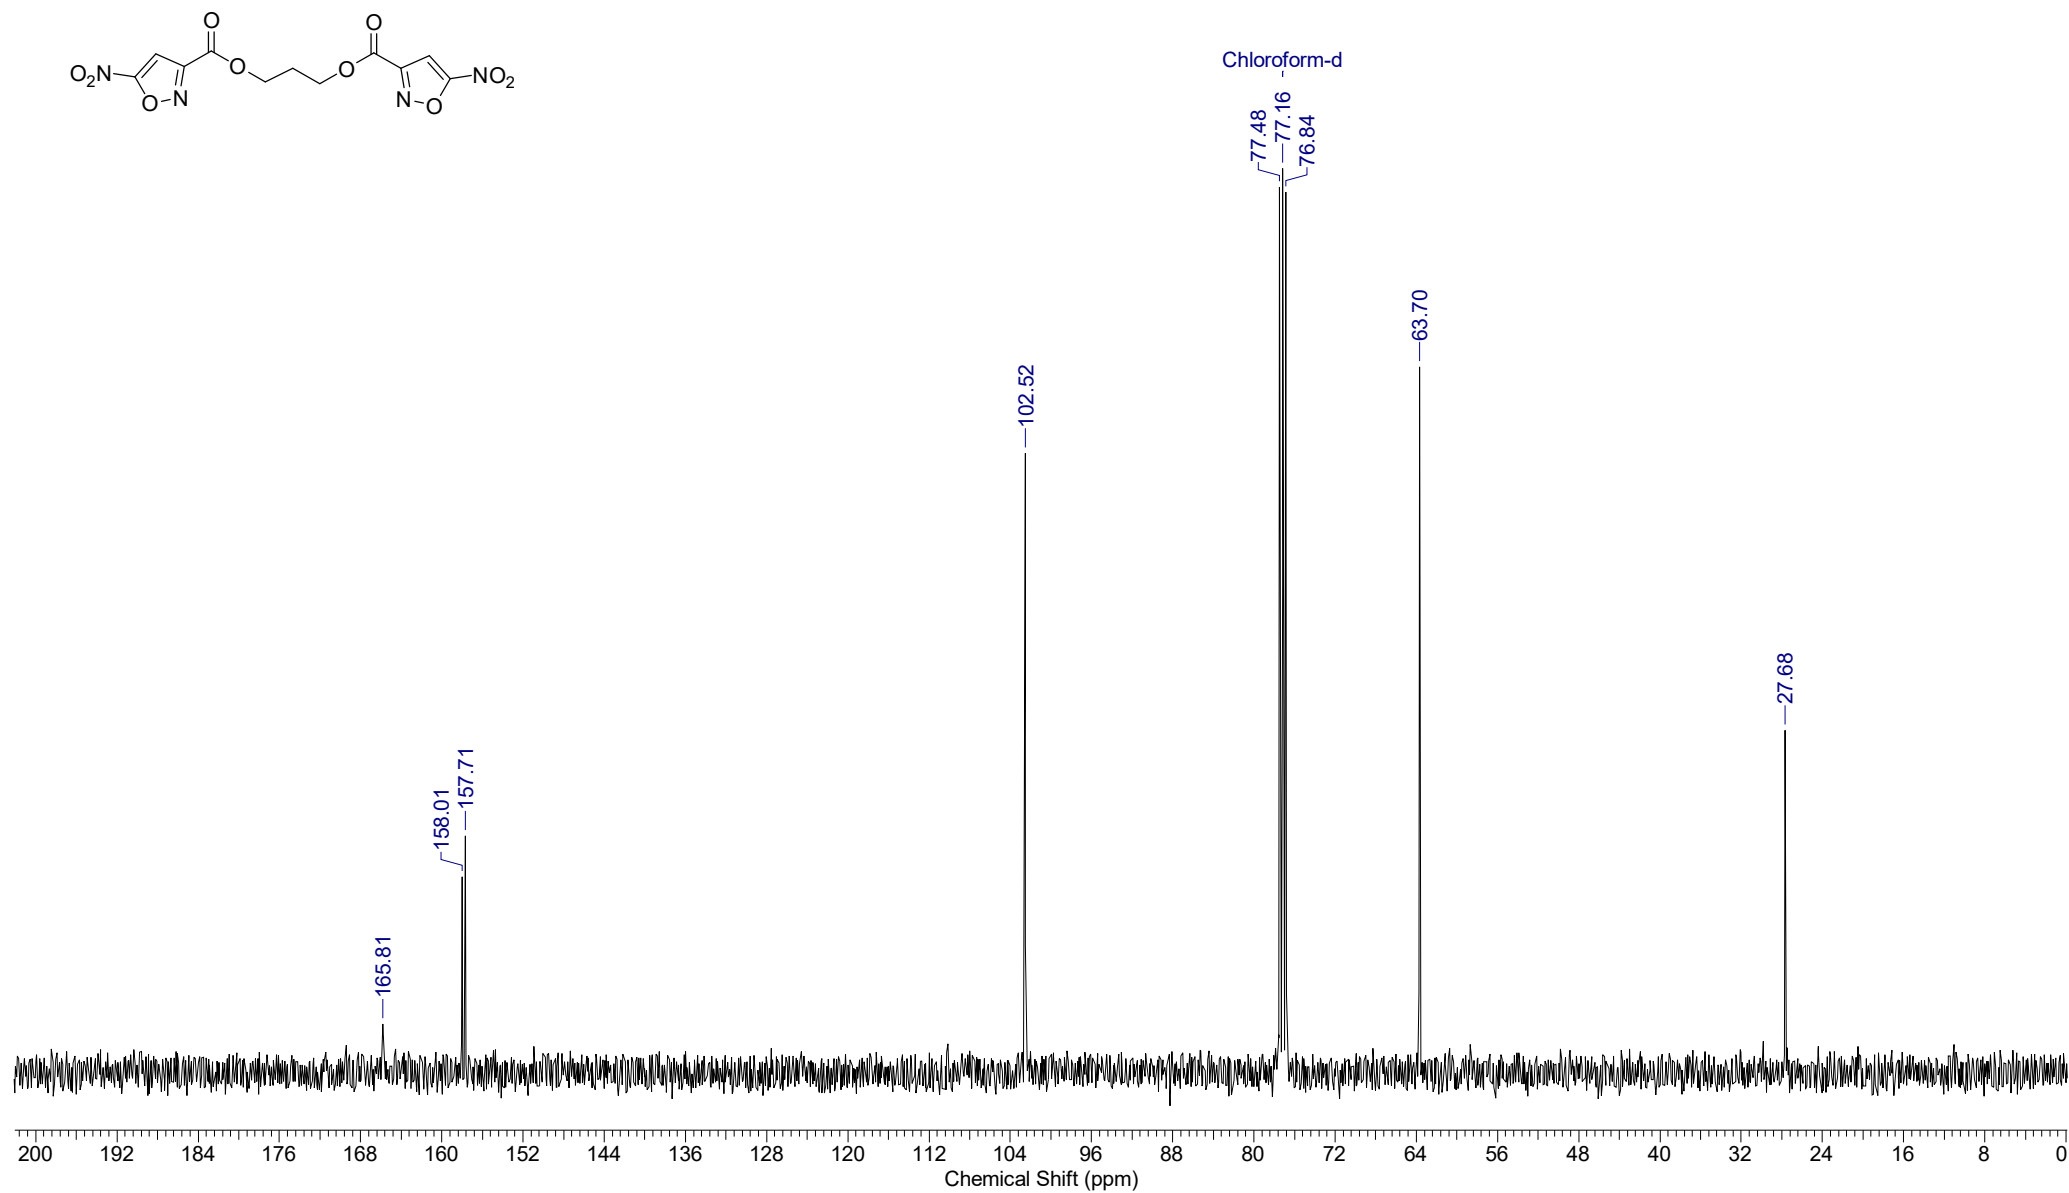

# Butane-1,4-diyl bis(5-nitroisoxazole-3-carboxylate) **3c** ( $^1\text{H}$ NMR)

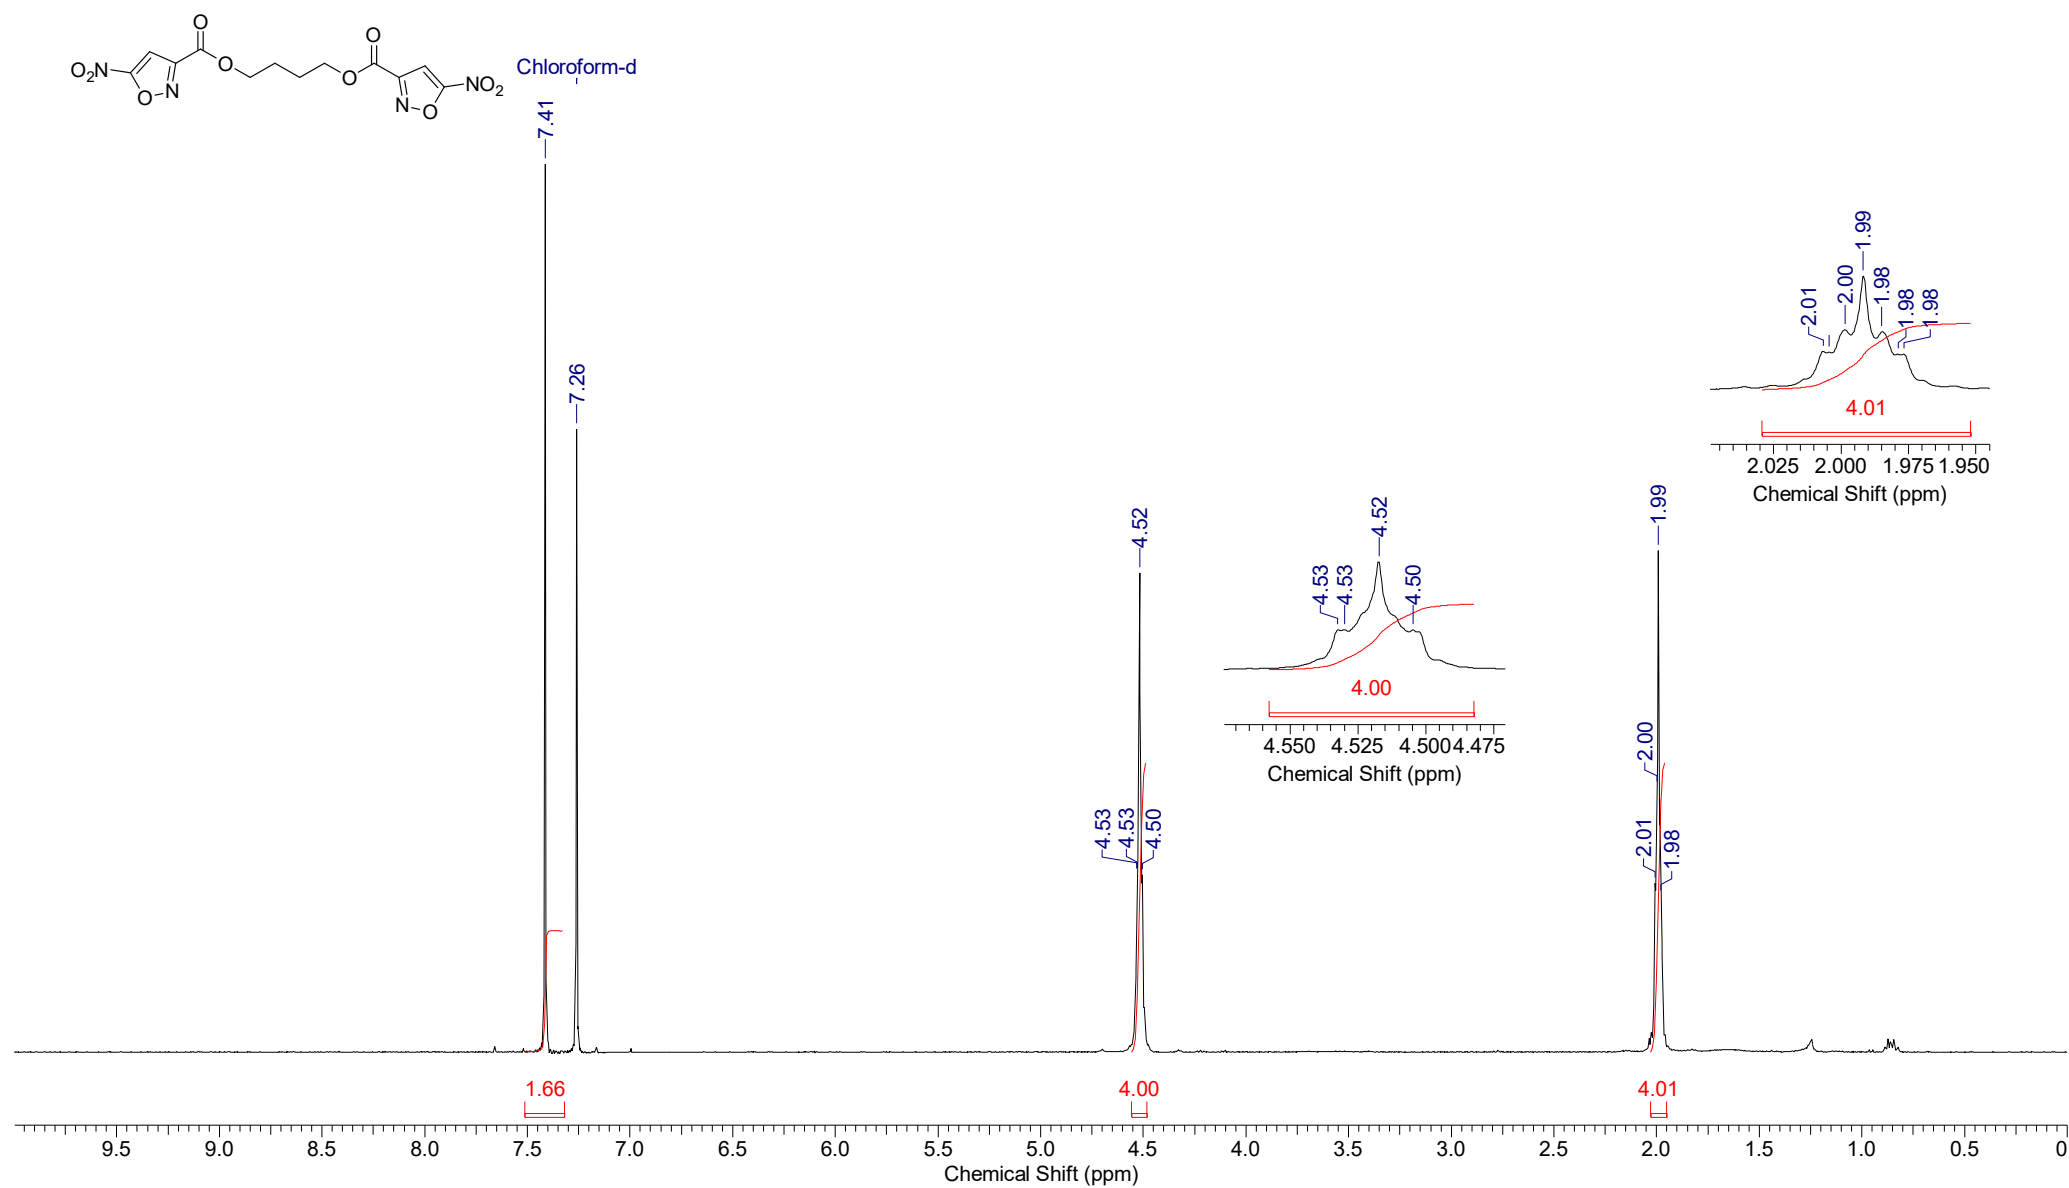

# Butane-1,4-diyl bis(5-nitroisoxazole-3-carboxylate) **3c** ( $^{13}\text{C}$ NMR)

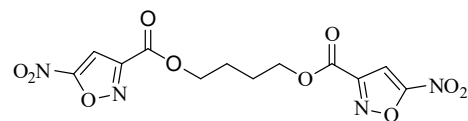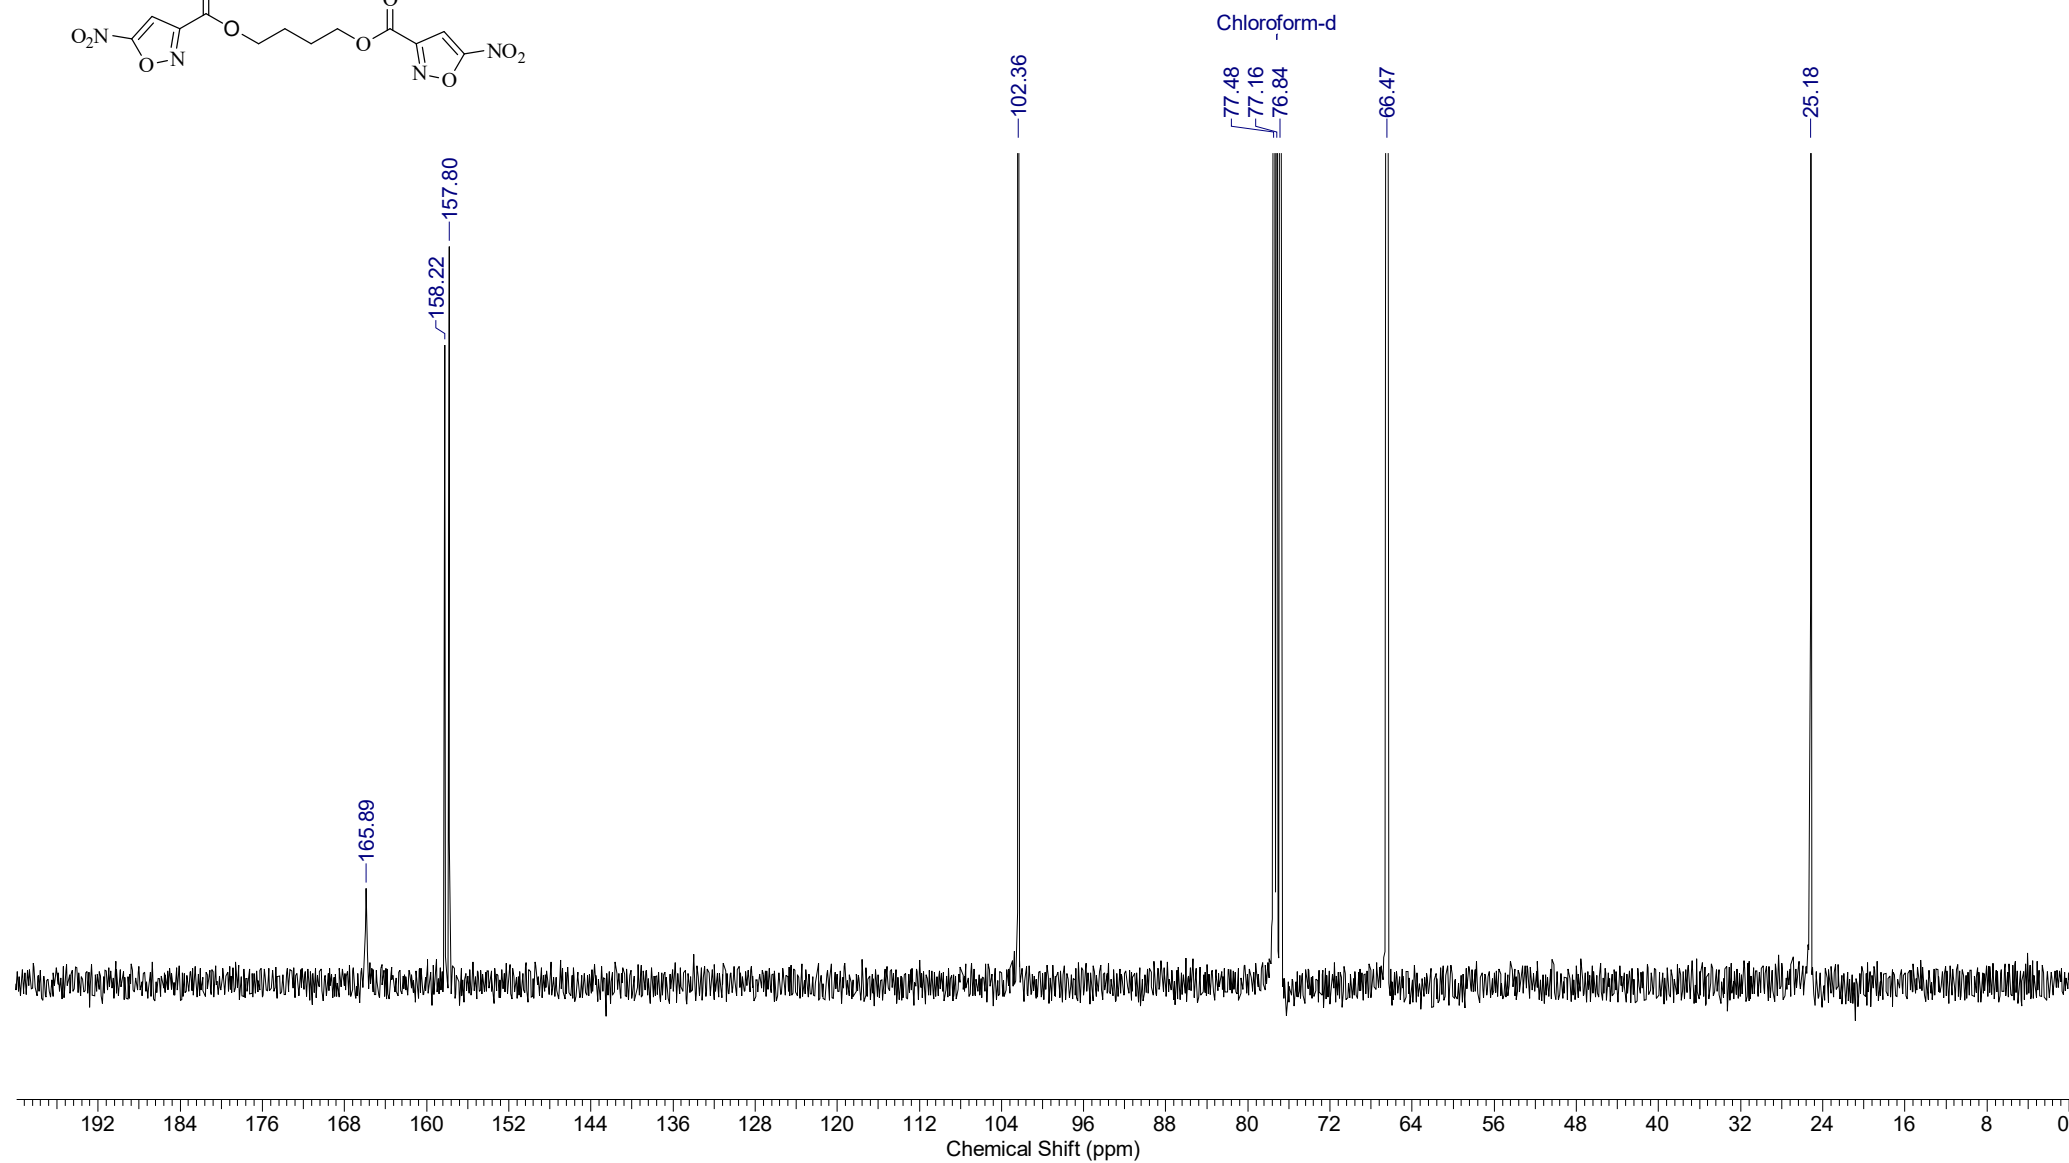

# Butane-1,4-diyl bis(5-nitroisoxazole-3-carboxylate) **3c** (HMBC)

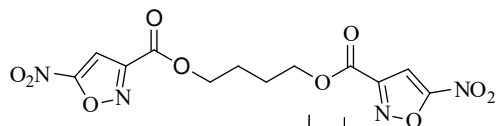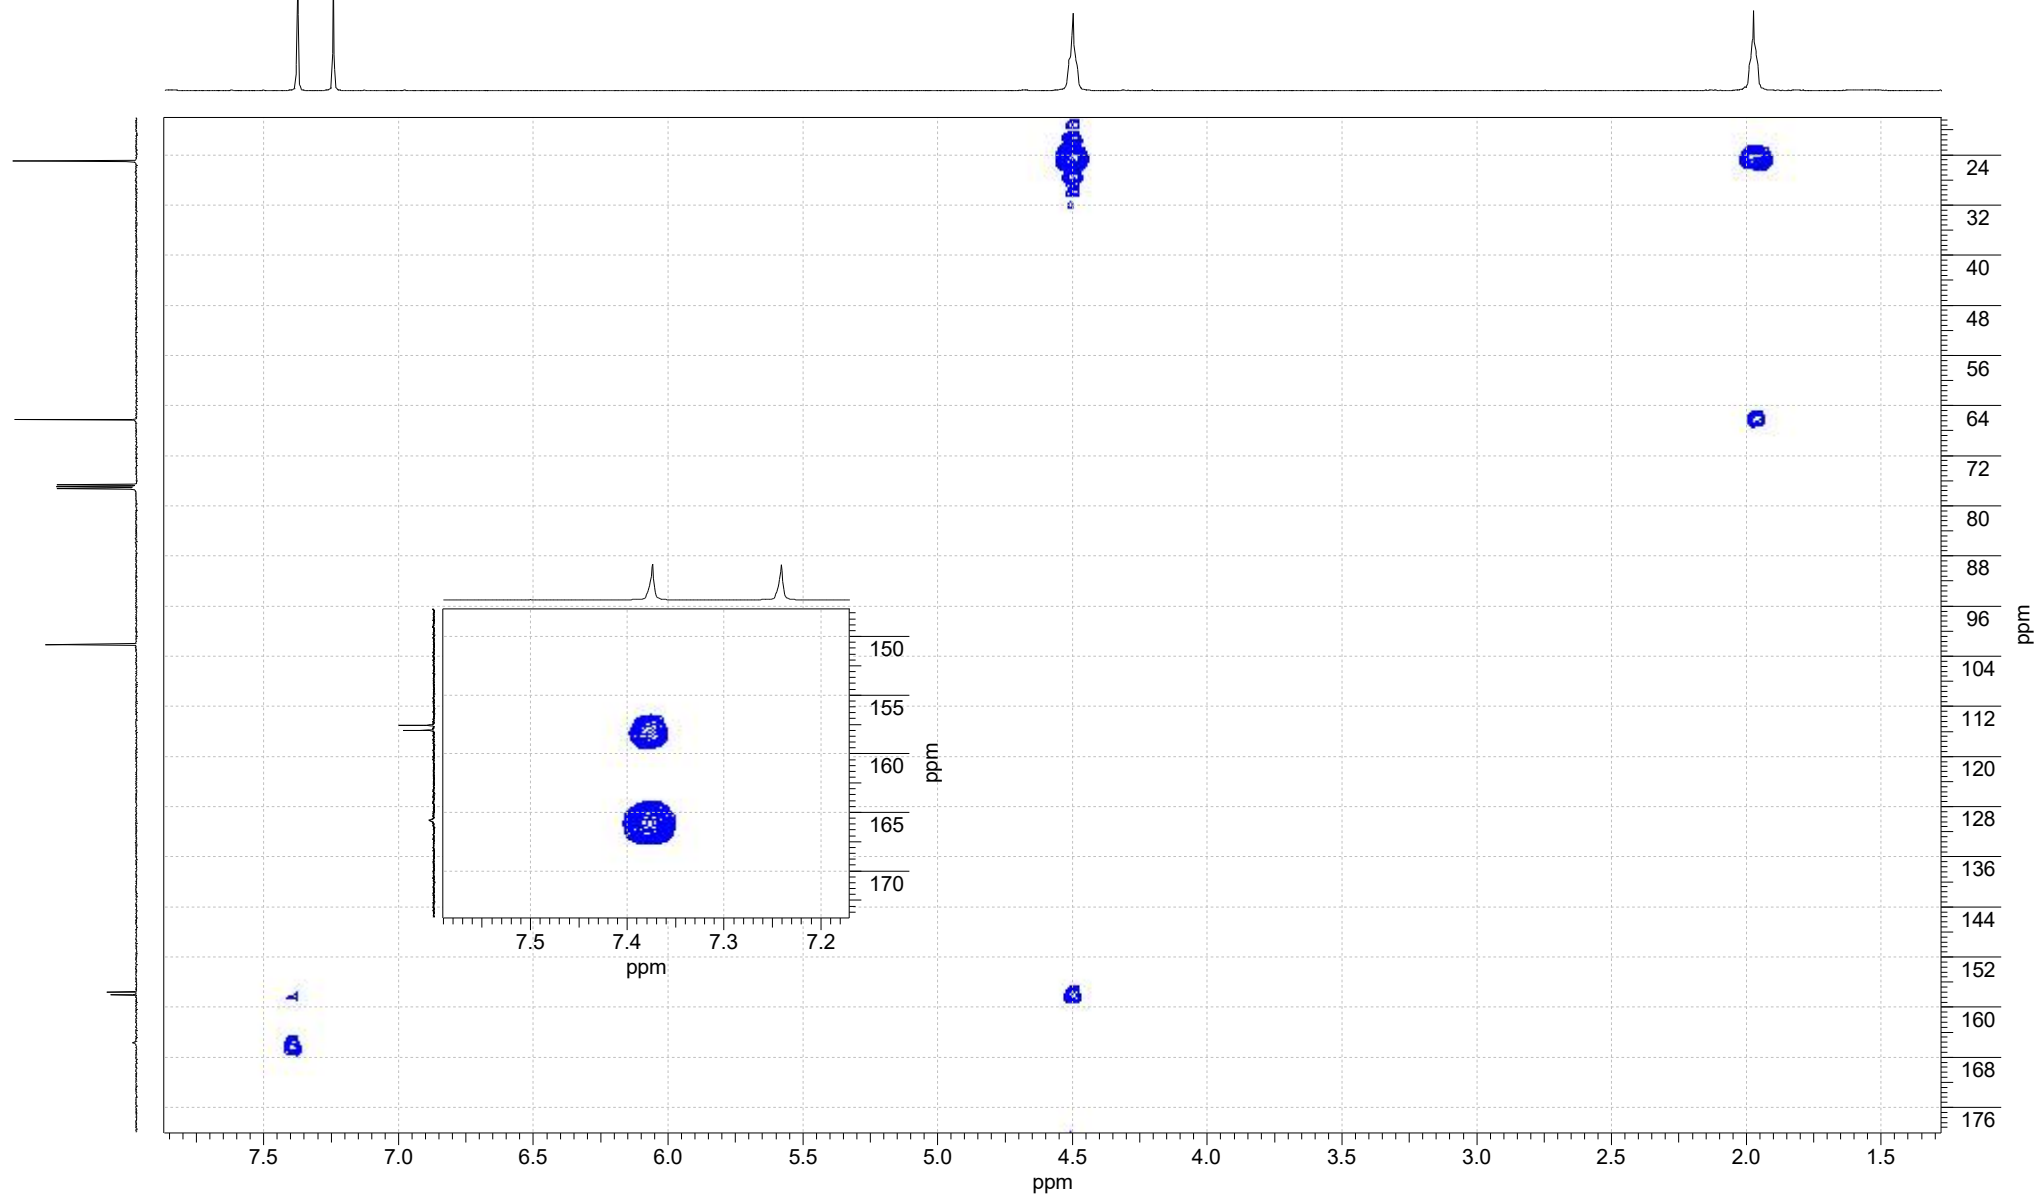

# 1,4-Phenylenedi(methylene) bis(5-nitroisoxazole-3-carboxylate) **3d** ( $^1\text{H}$ NMR)

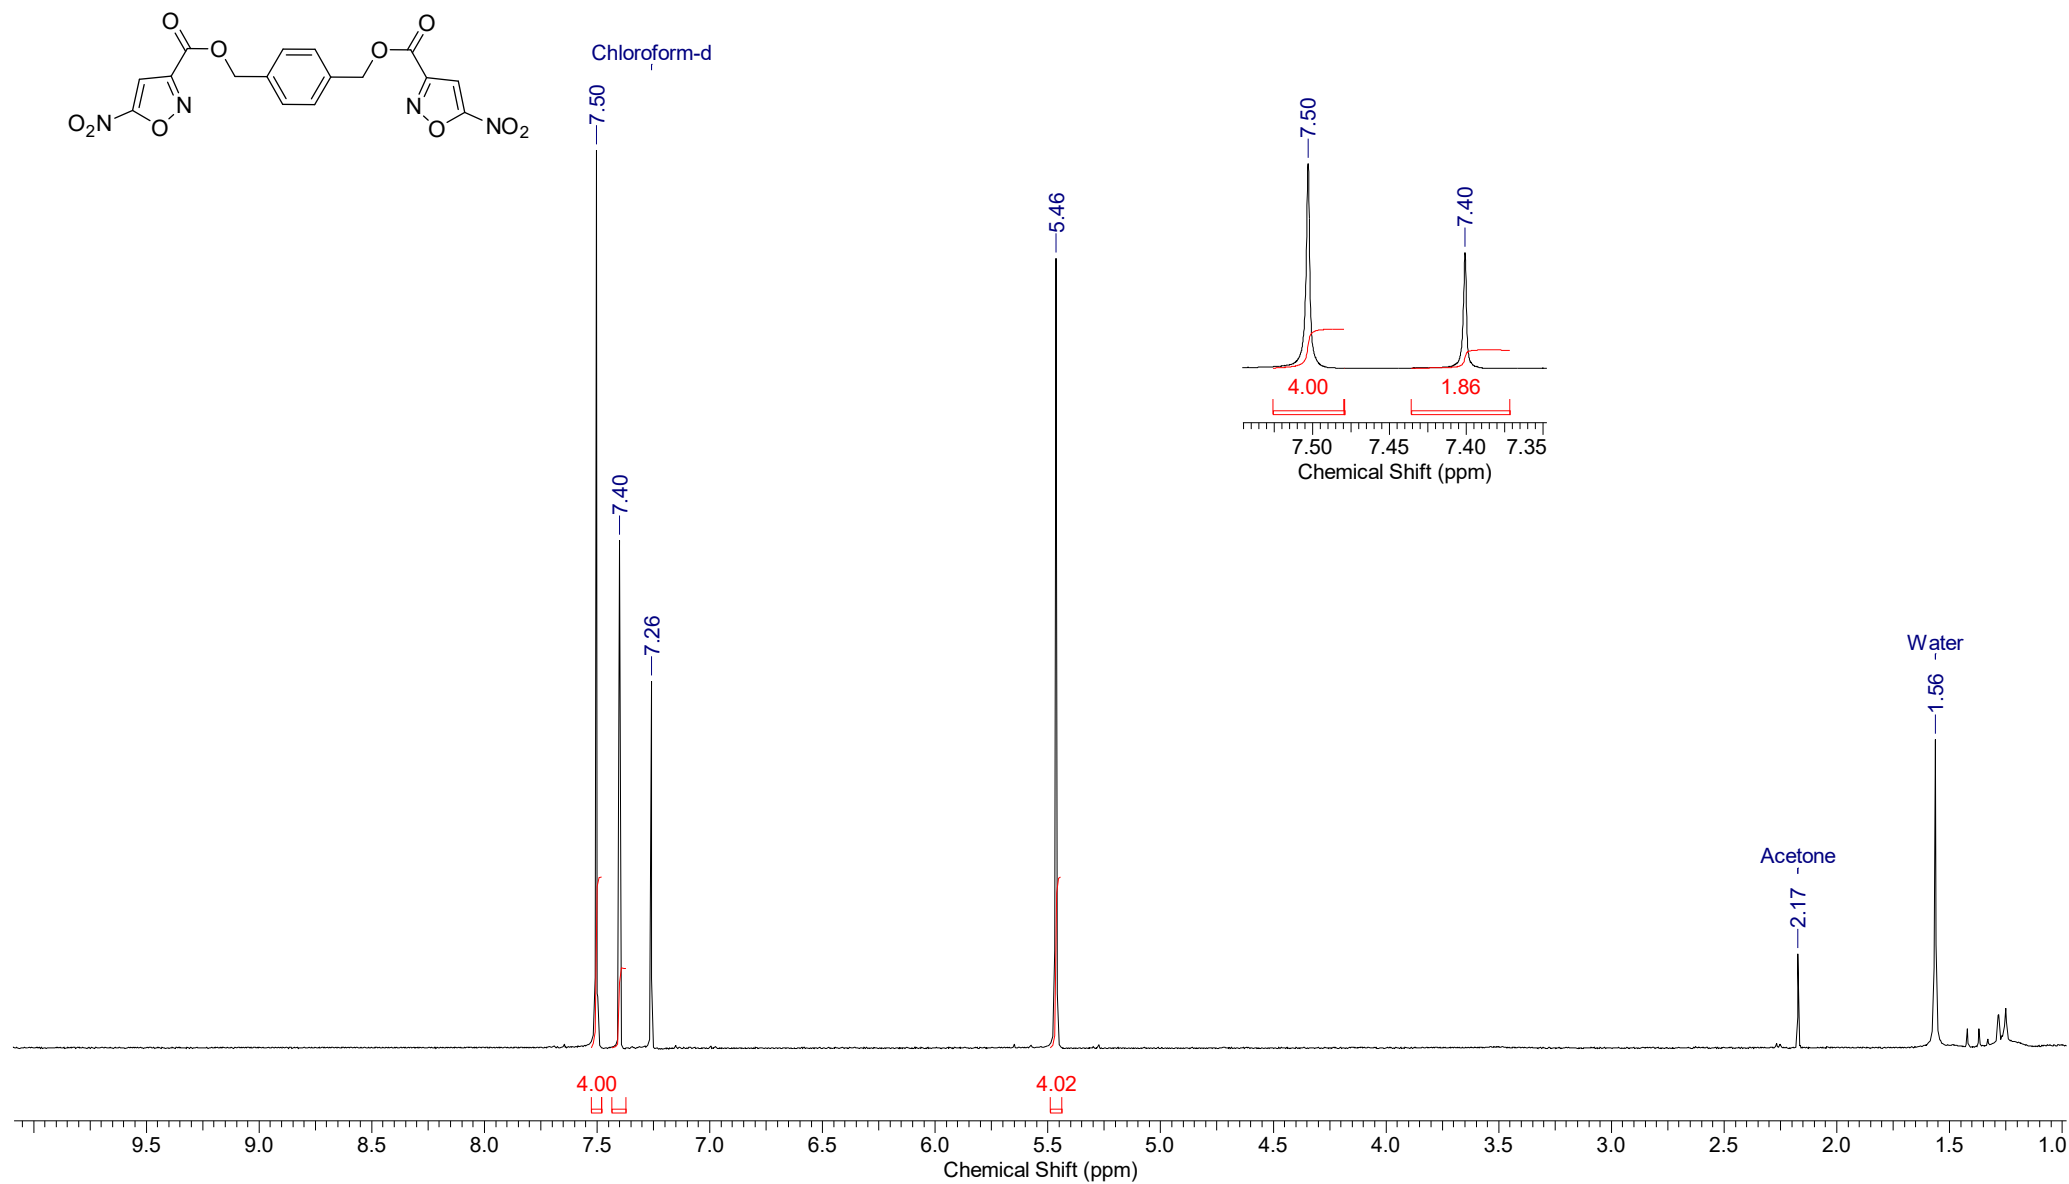

# 1,4-Phenylenedi(methylene) bis(5-nitroisoxazole-3-carboxylate) **3d** ( $^{13}\text{C}$ NMR)

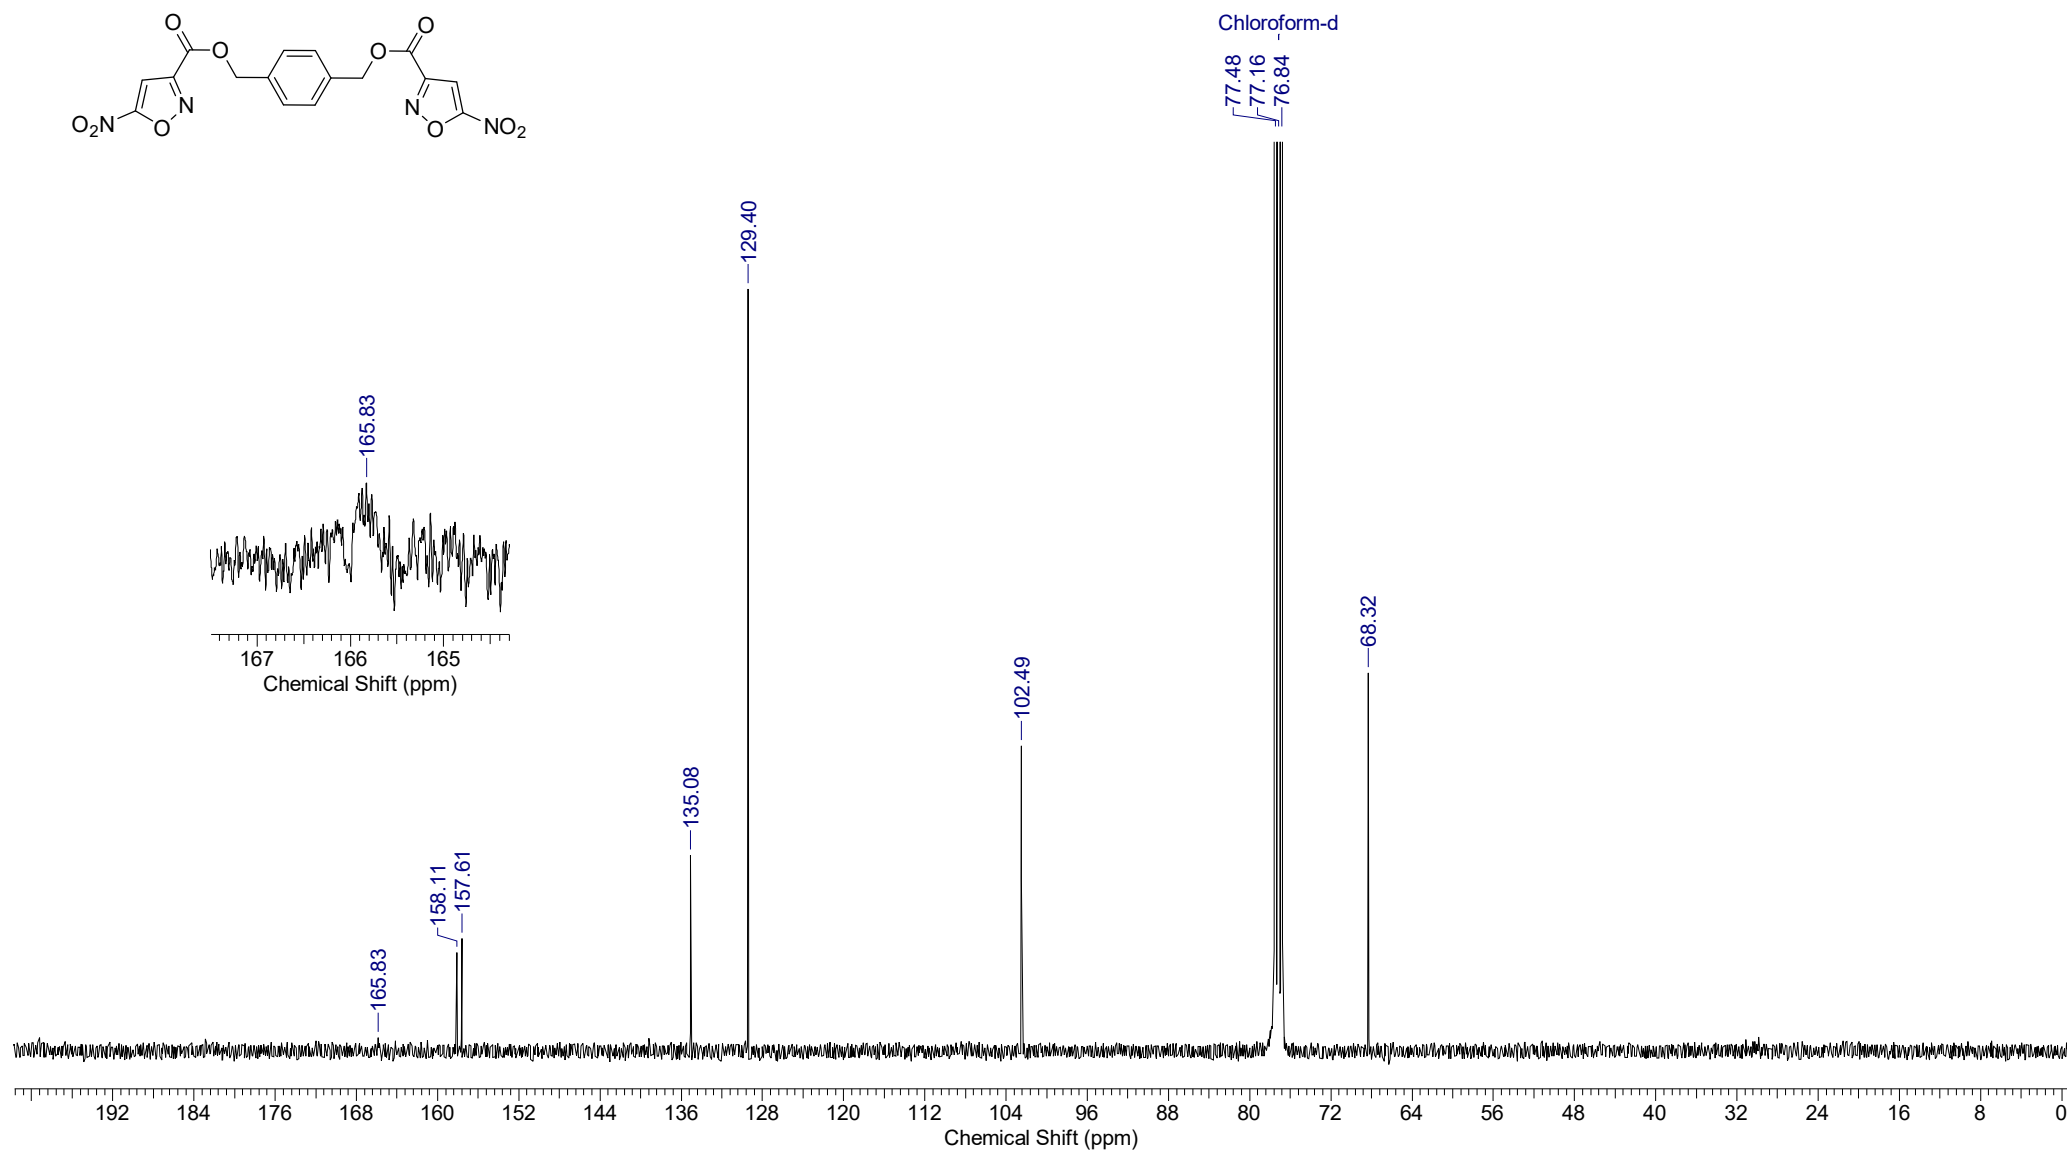



# 1,3-Phenylenedi(methylene) bis(5-nitroisoxazole-3-carboxylate) **3e** ( $^1\text{H}$ NMR)

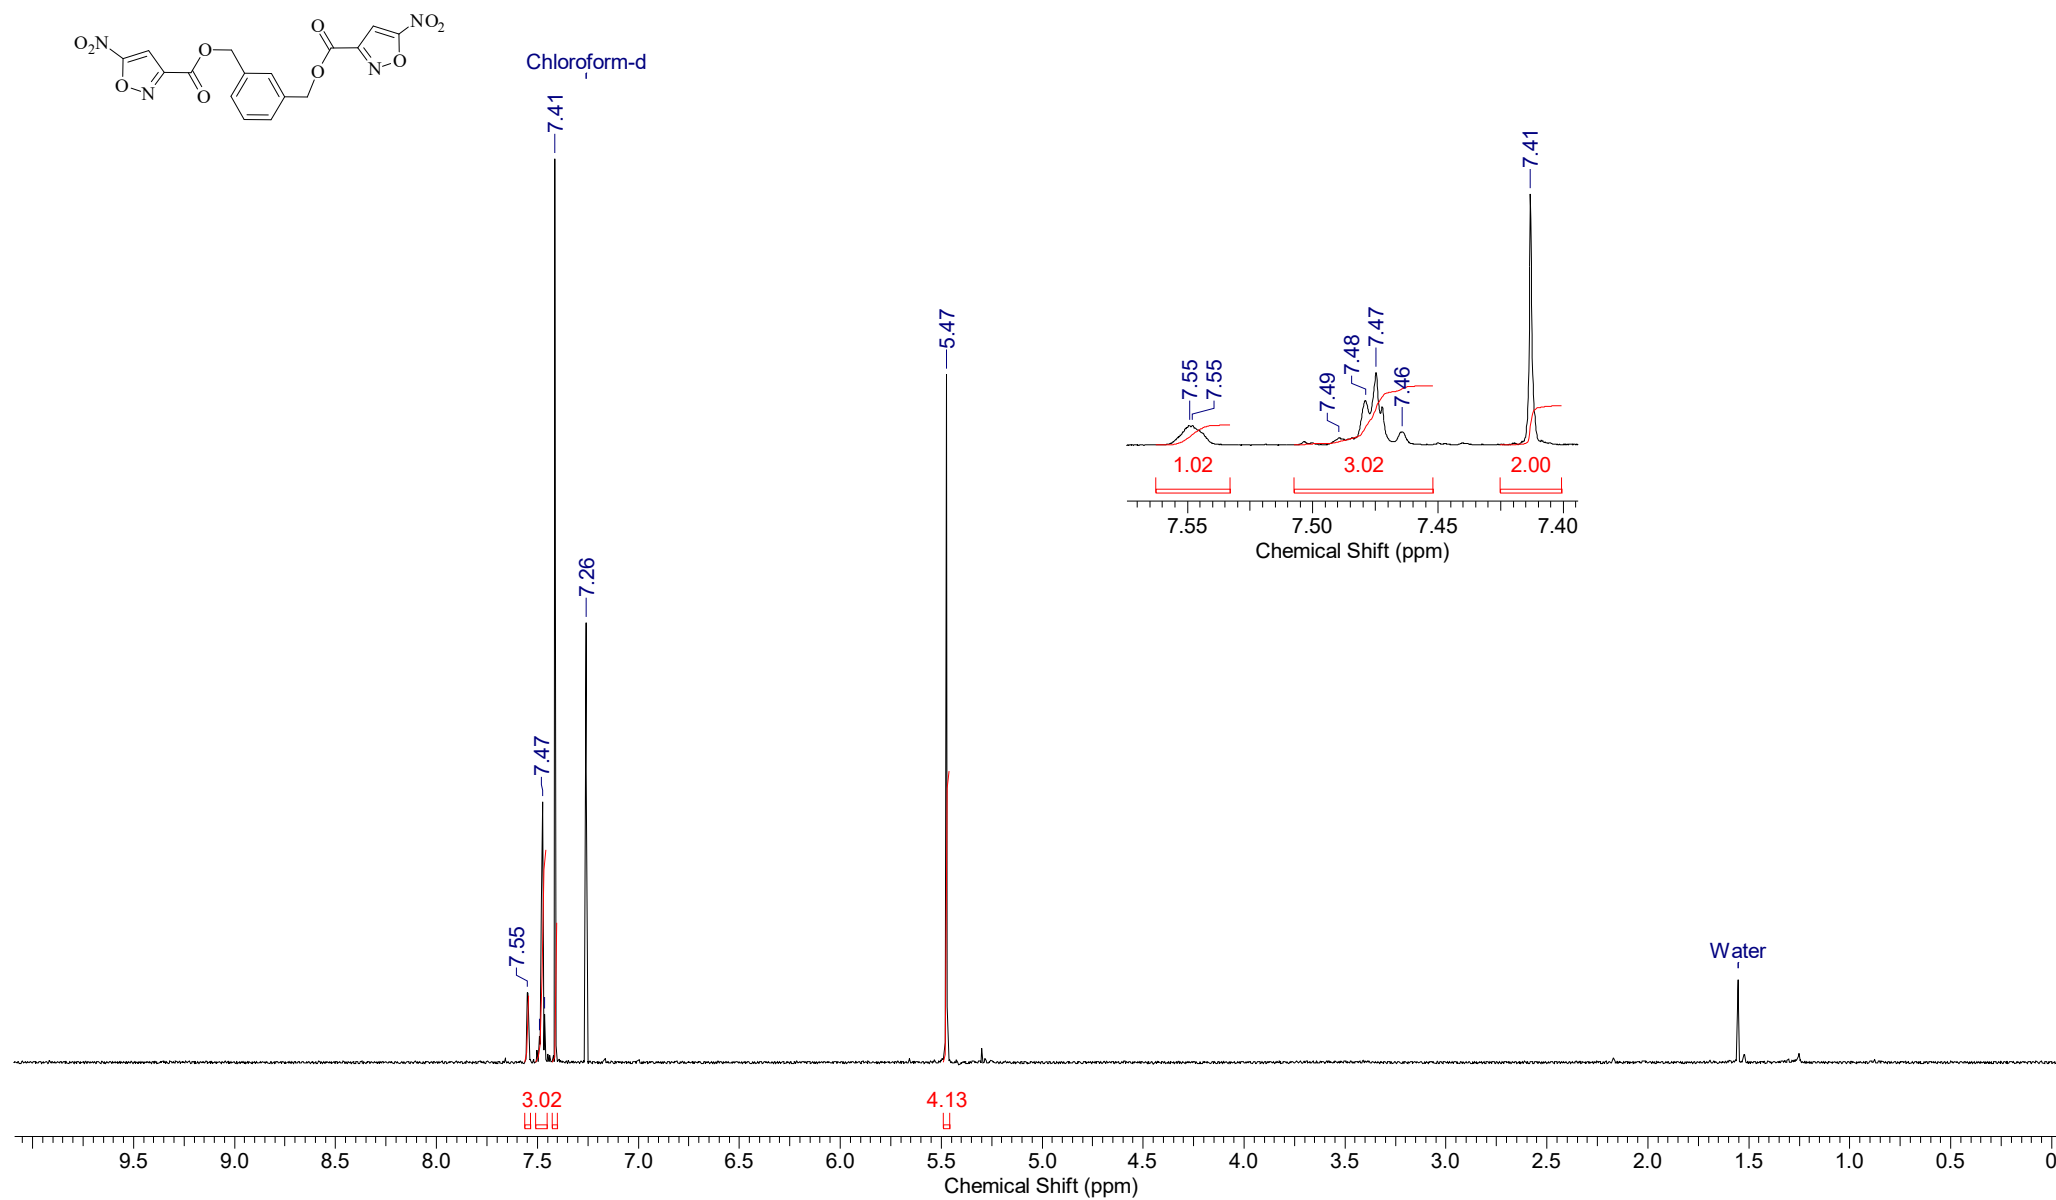

# 1,3-Phenylenedi(methylene) bis(5-nitroisoxazole-3-carboxylate) **3e** ( $^{13}\text{C}$ NMR)

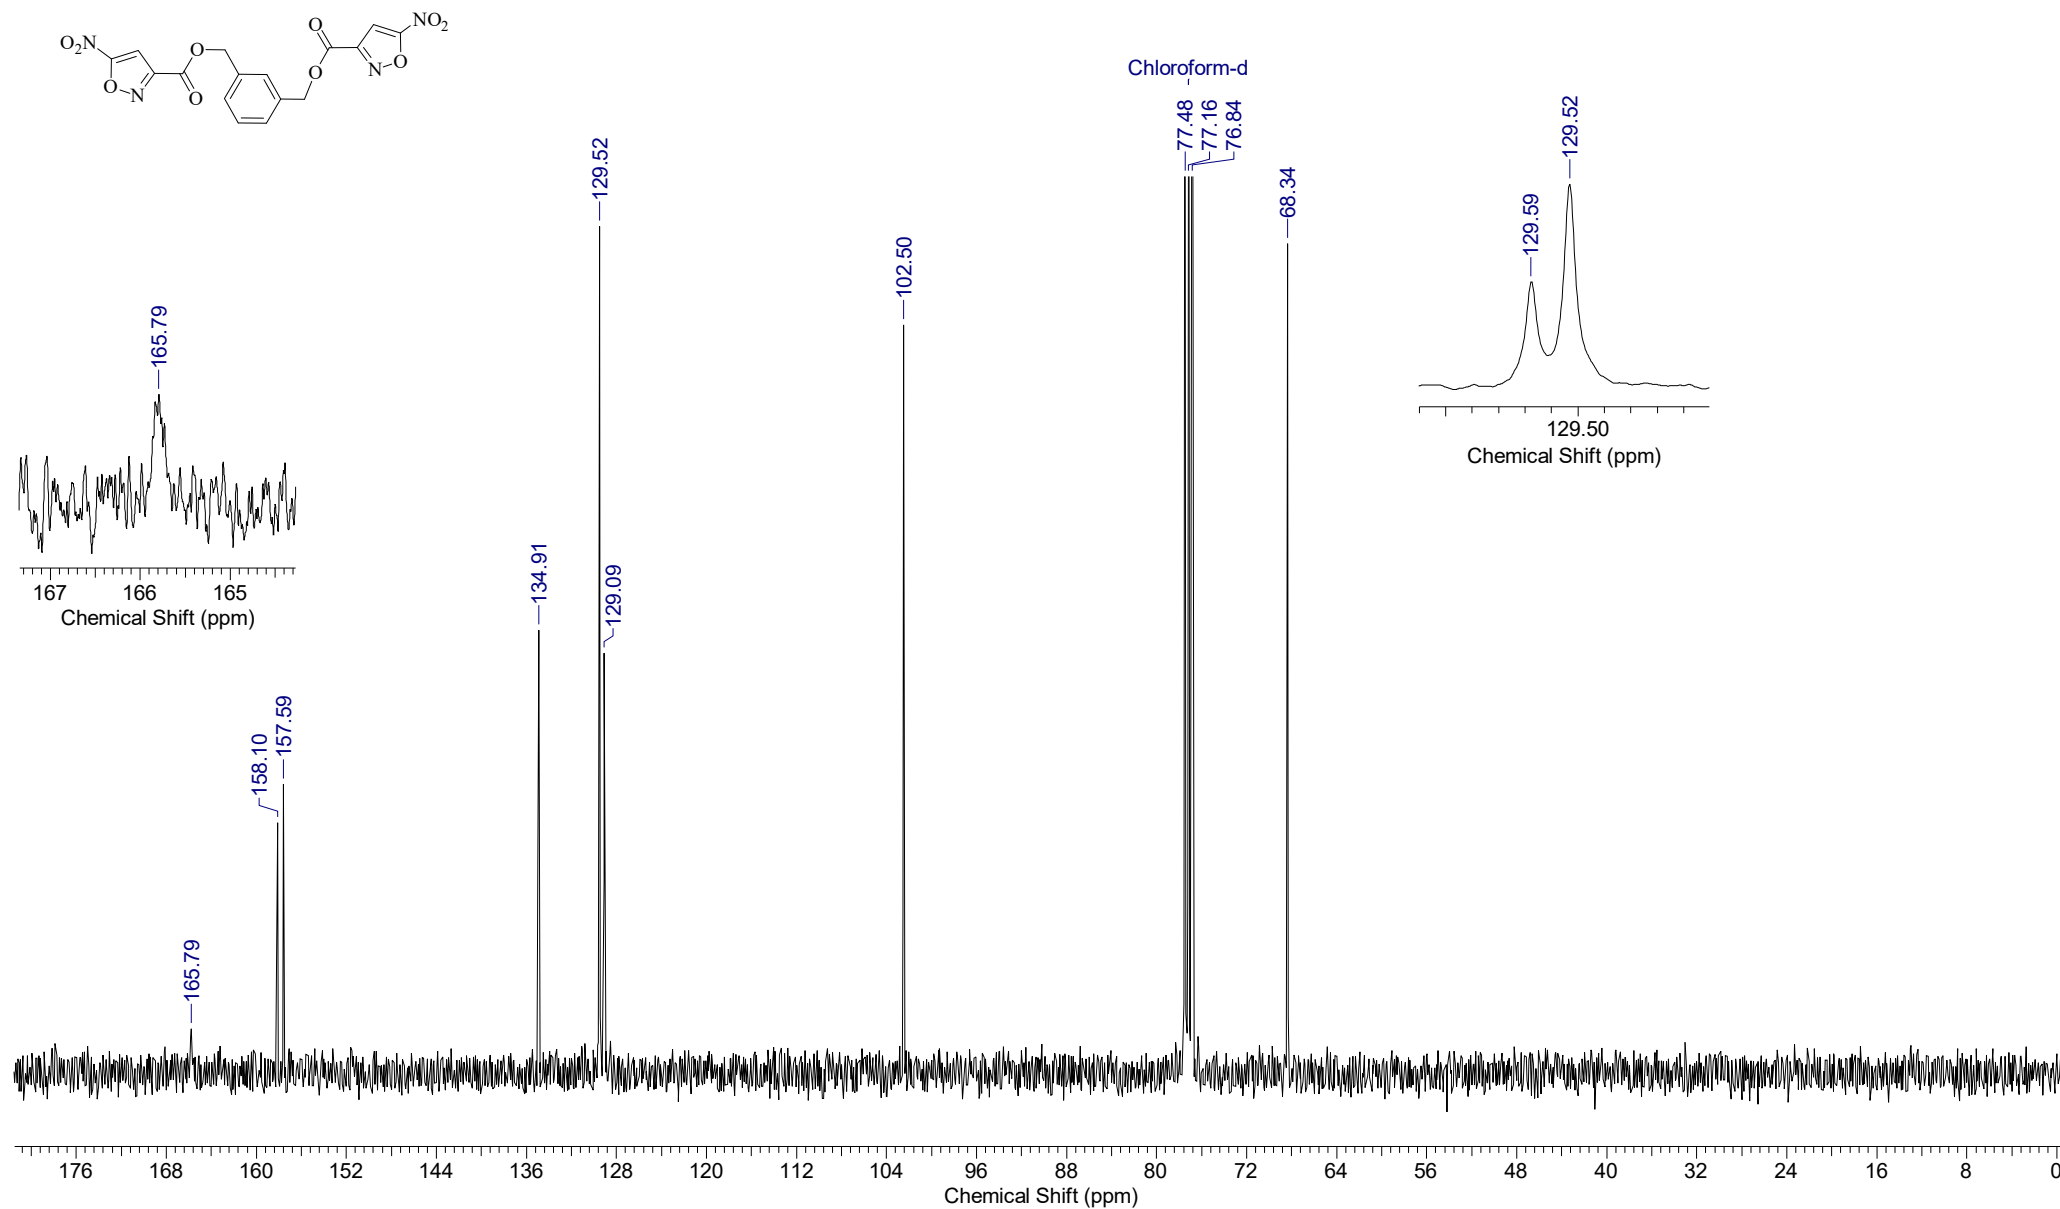

1,2-Phenylenedi(methylene) bis(5-nitroisoxazole-3-carboxylate) **3f** ( $^1\text{H}$  NMR)

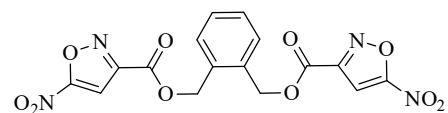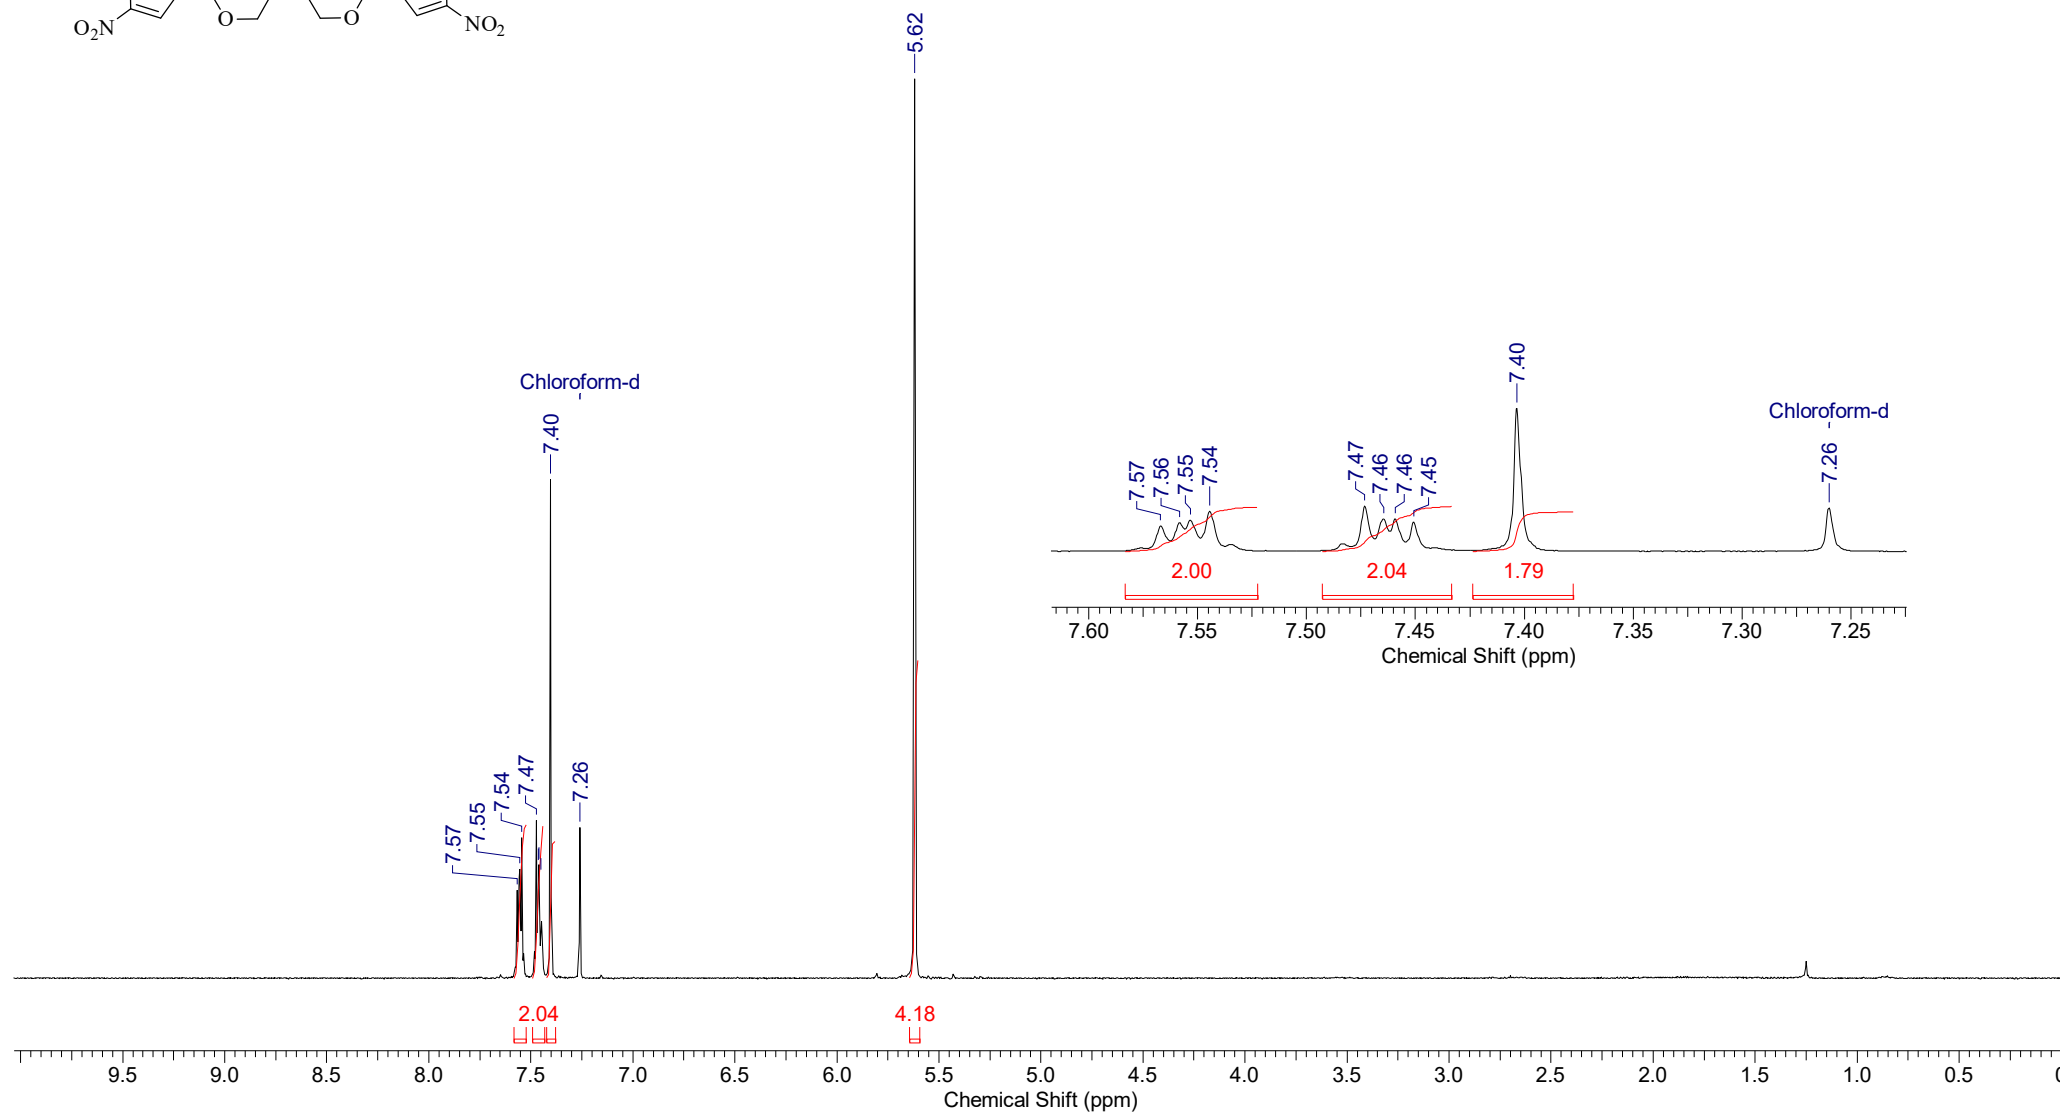

# 1,2-Phenylenedi(methylene) bis(5-nitroisoxazole-3-carboxylate) **3f** ( $^{13}\text{C}$ NMR)

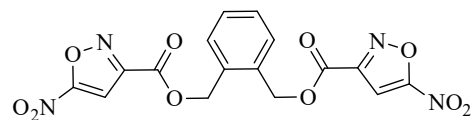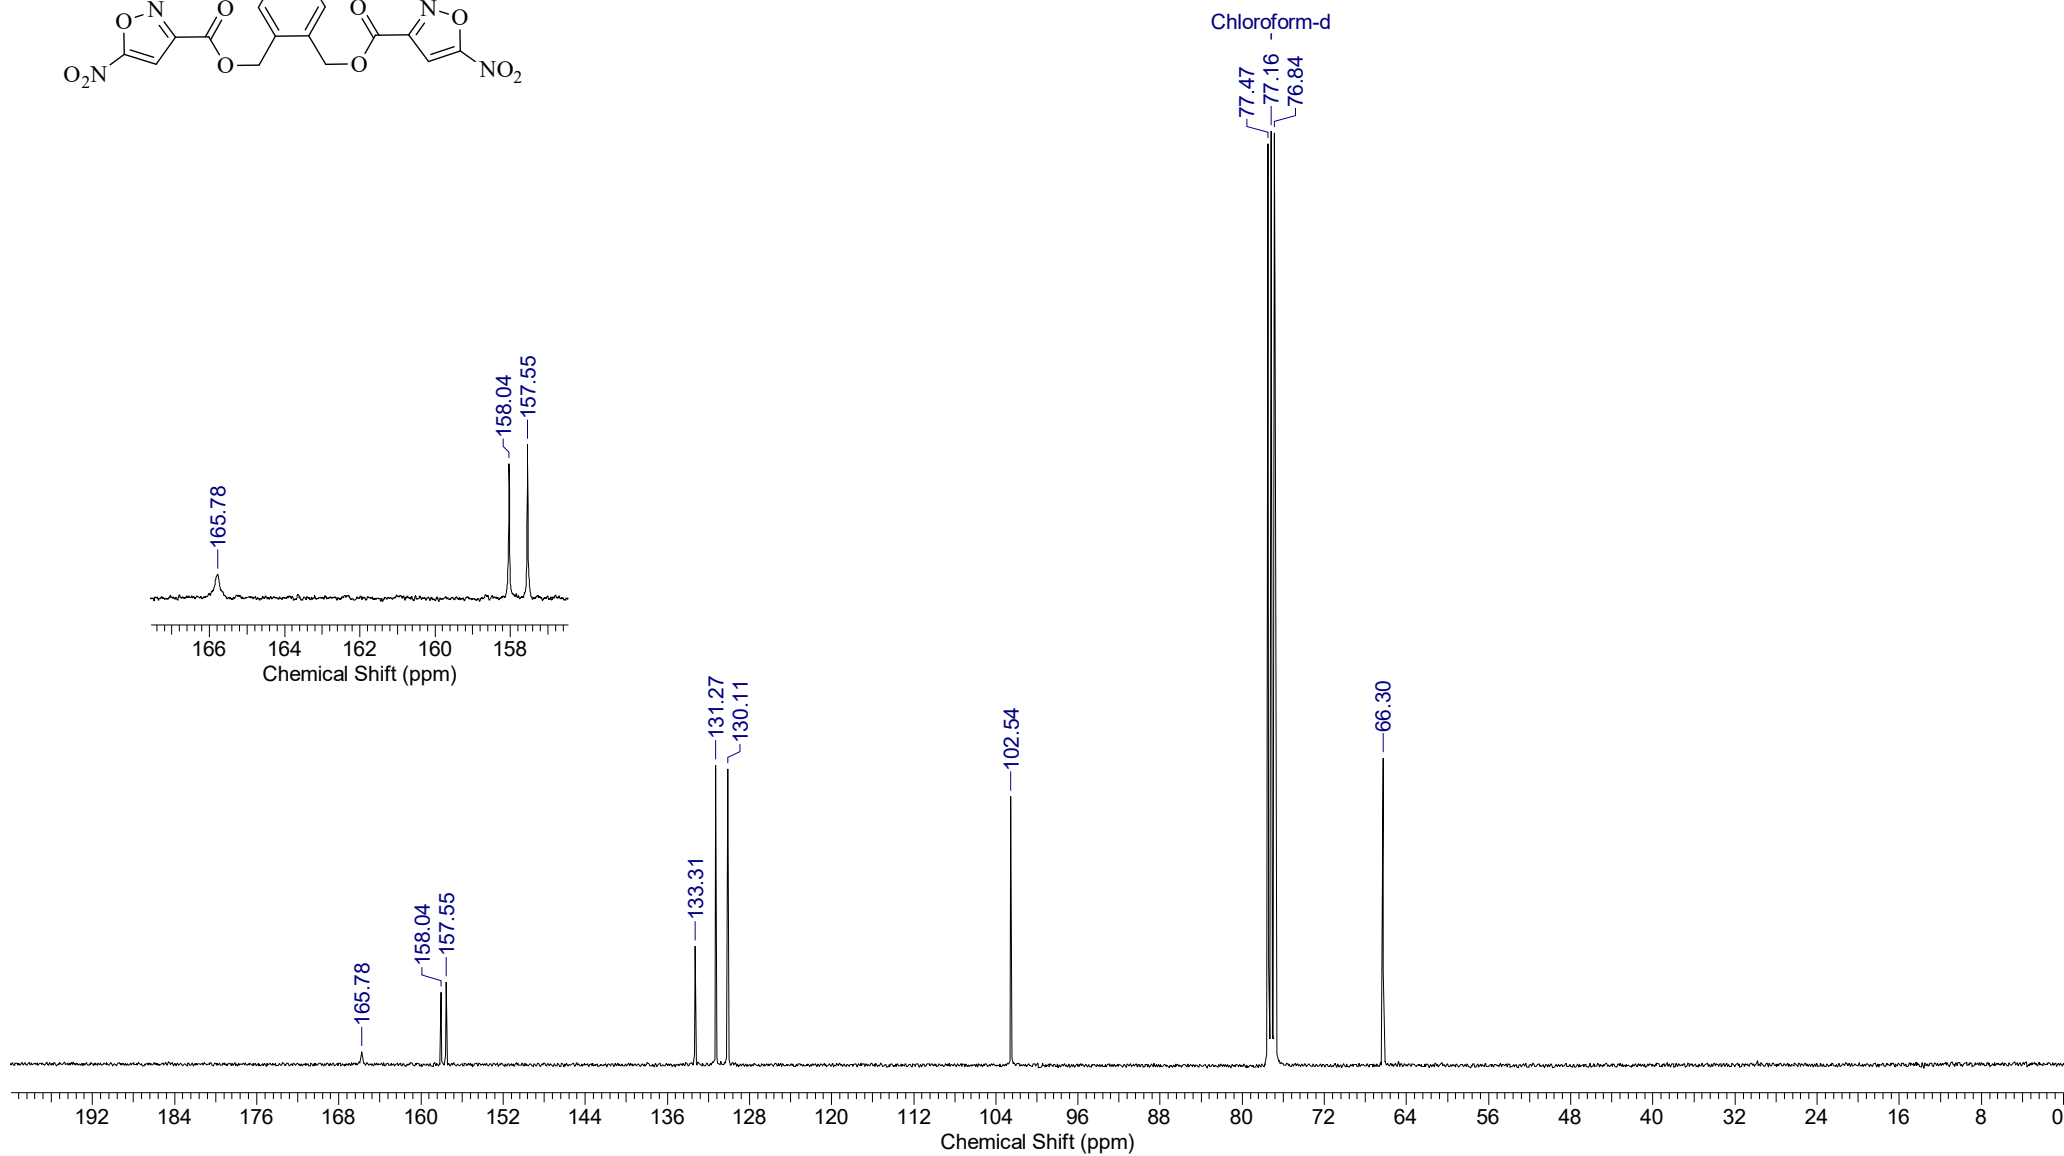

# 1,2-Phenylenedi(methylene) bis(5-nitroisoxazole-3-carboxylate) **3f** (HMBC)

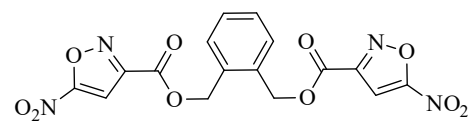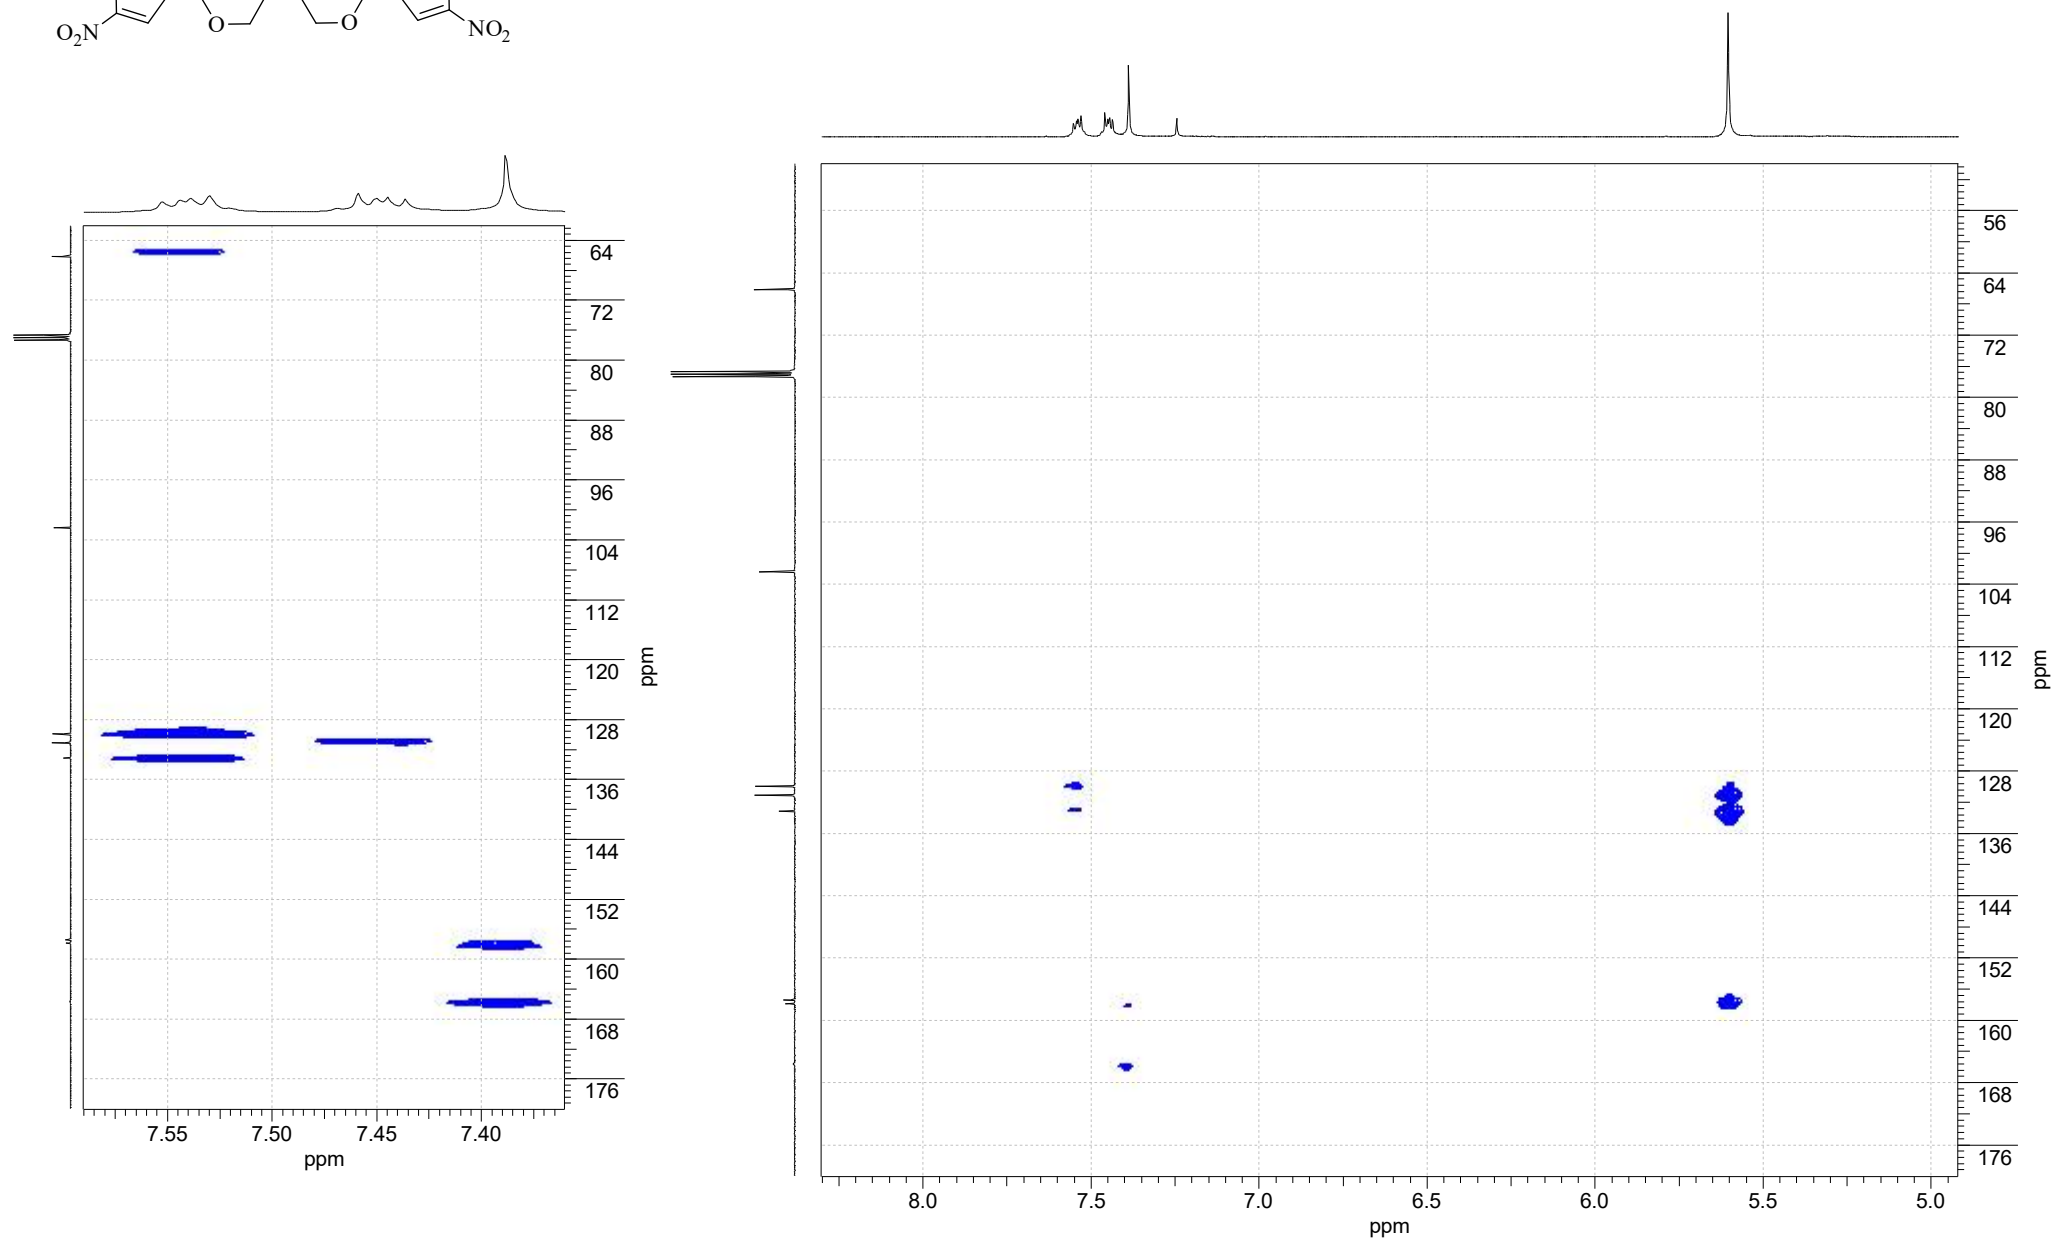

# Adamantane-1,3-diyl di(methylene) bis(5-nitroisoxazole-3-carboxylate) **3g** ( $^1\text{H}$ NMR)

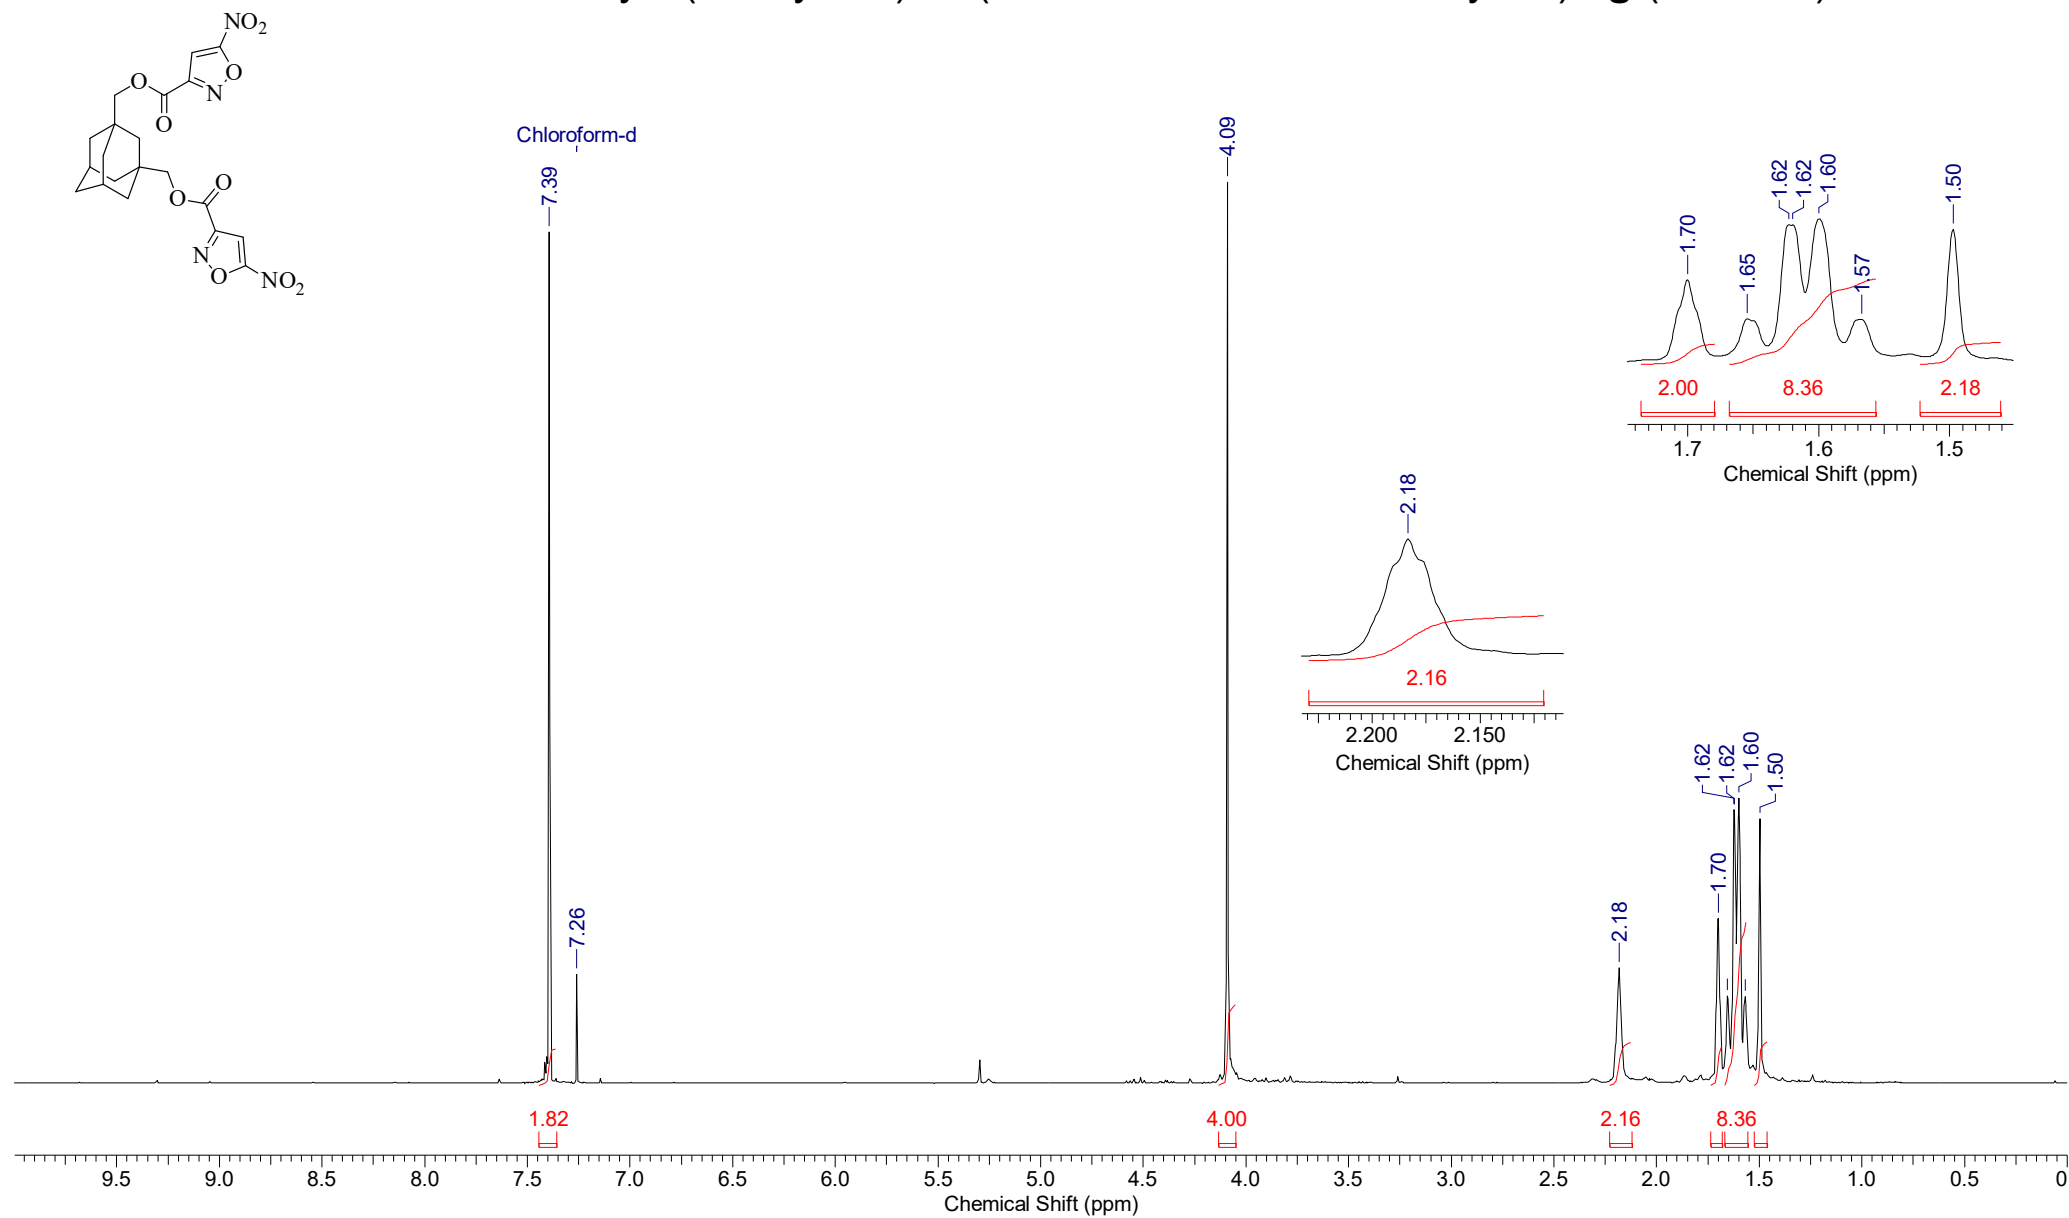

Adamantane-1,3-diyl di(methylene) bis(5-nitroisoxazole-3-carboxylate) **3g** ( $^{13}\text{C}$  NMR)

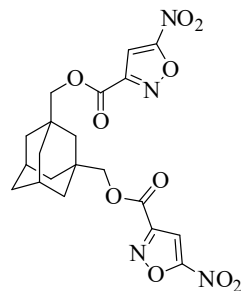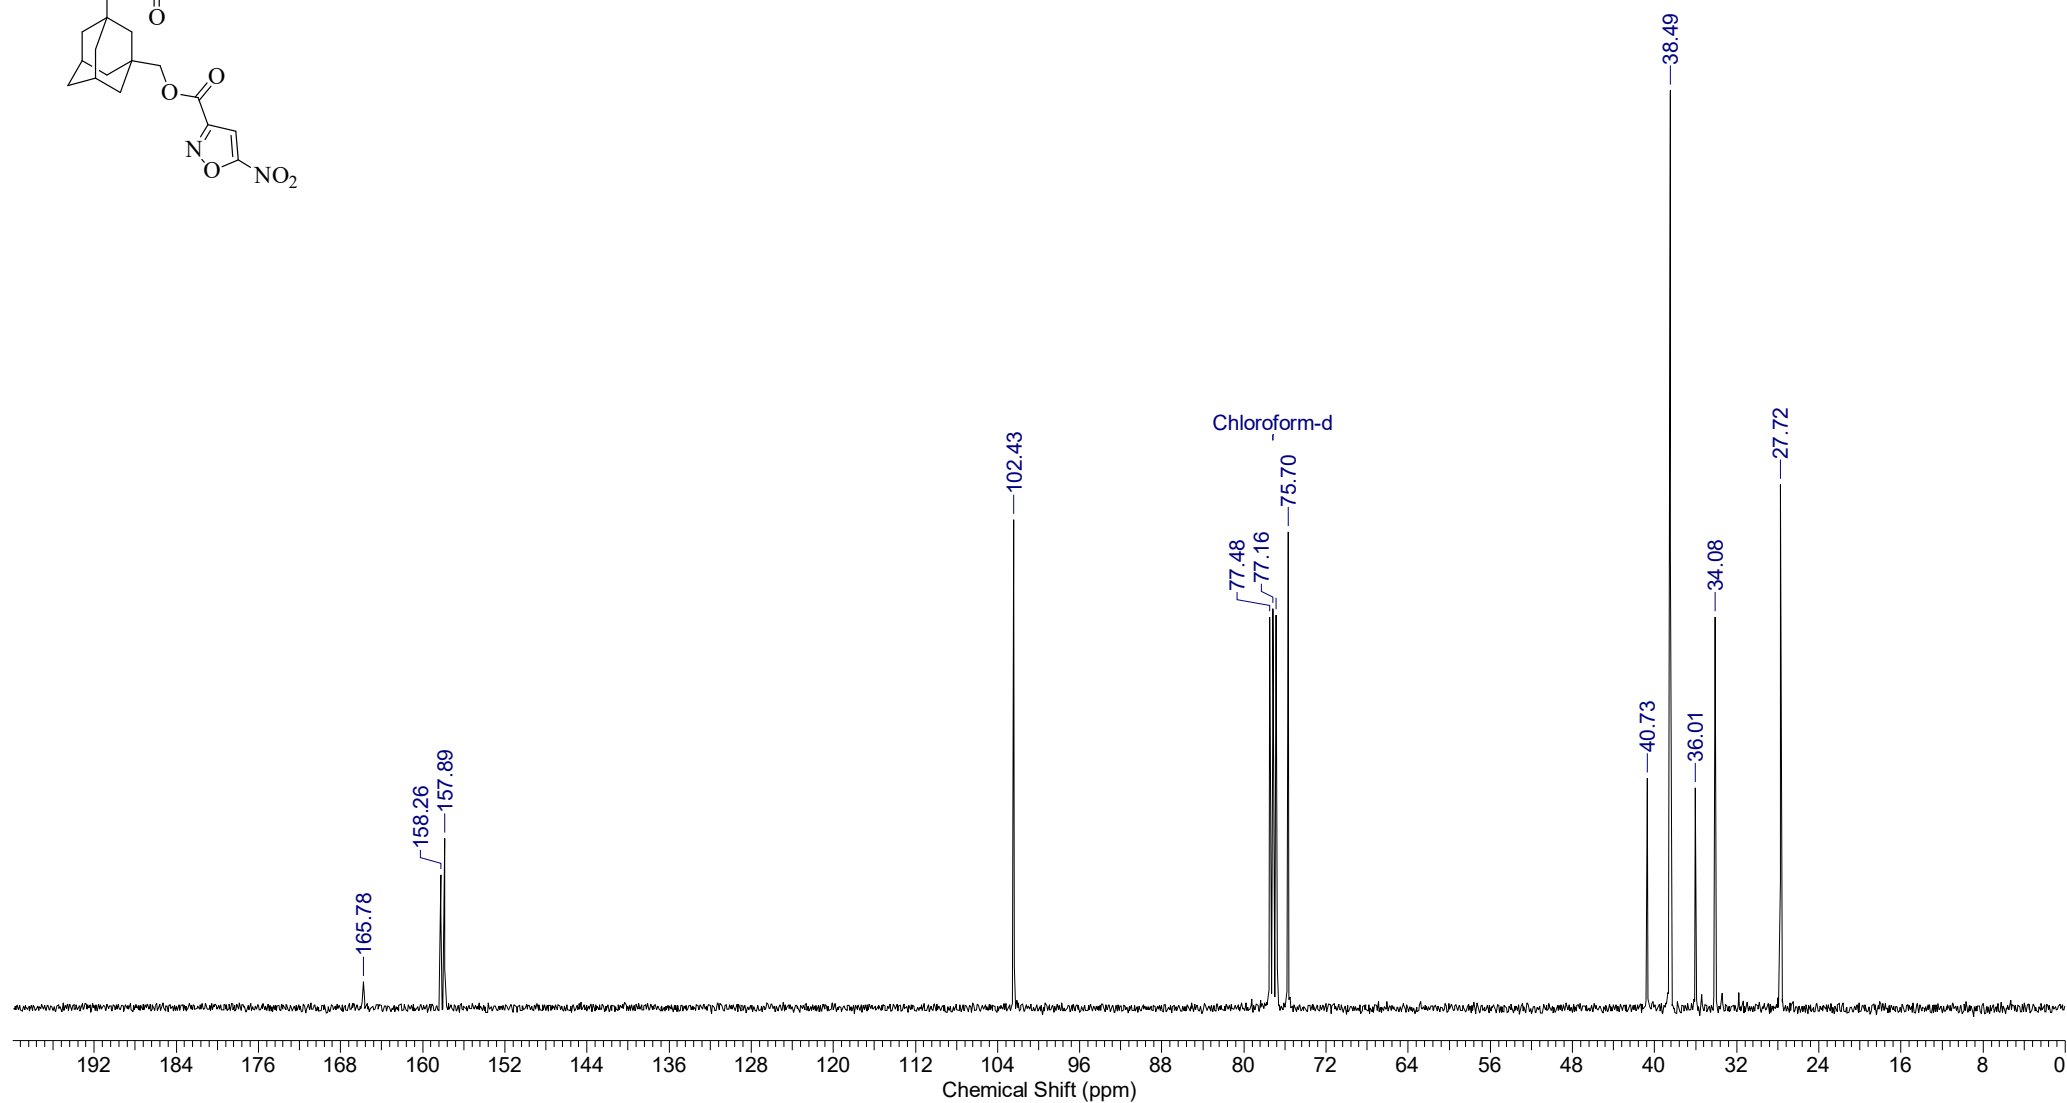

# Adamantane-1,3-diyl di(methylene) bis(5-nitroisoxazole-3-carboxylate) **3g** (APT)

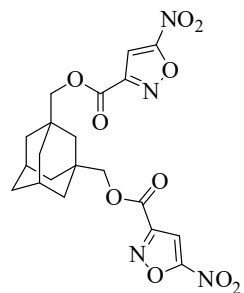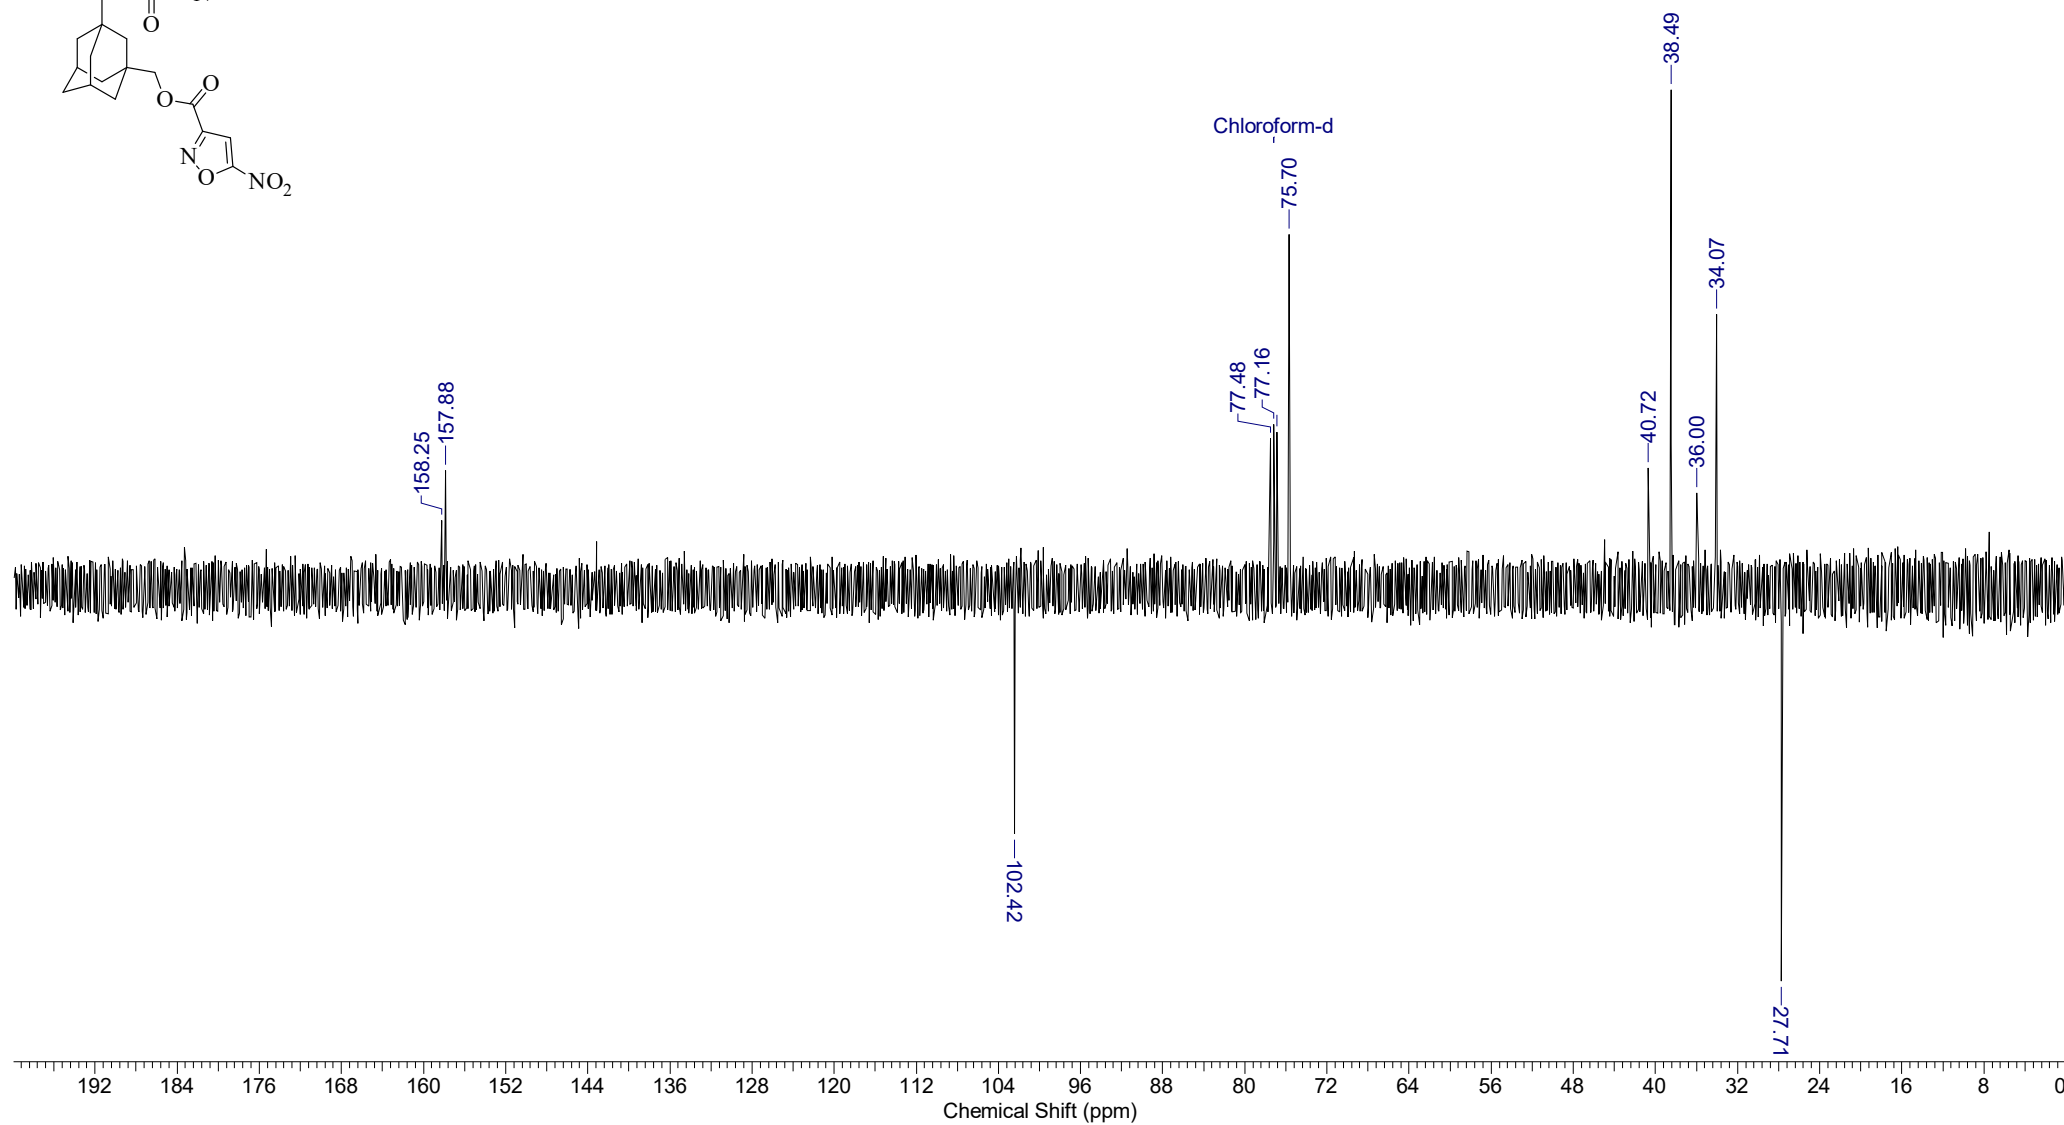



# Adamantane-1,3-diyl di(methylene) bis(5-nitroisoxazole-3-carboxylate) **3g**

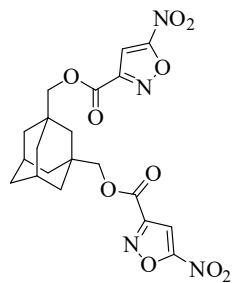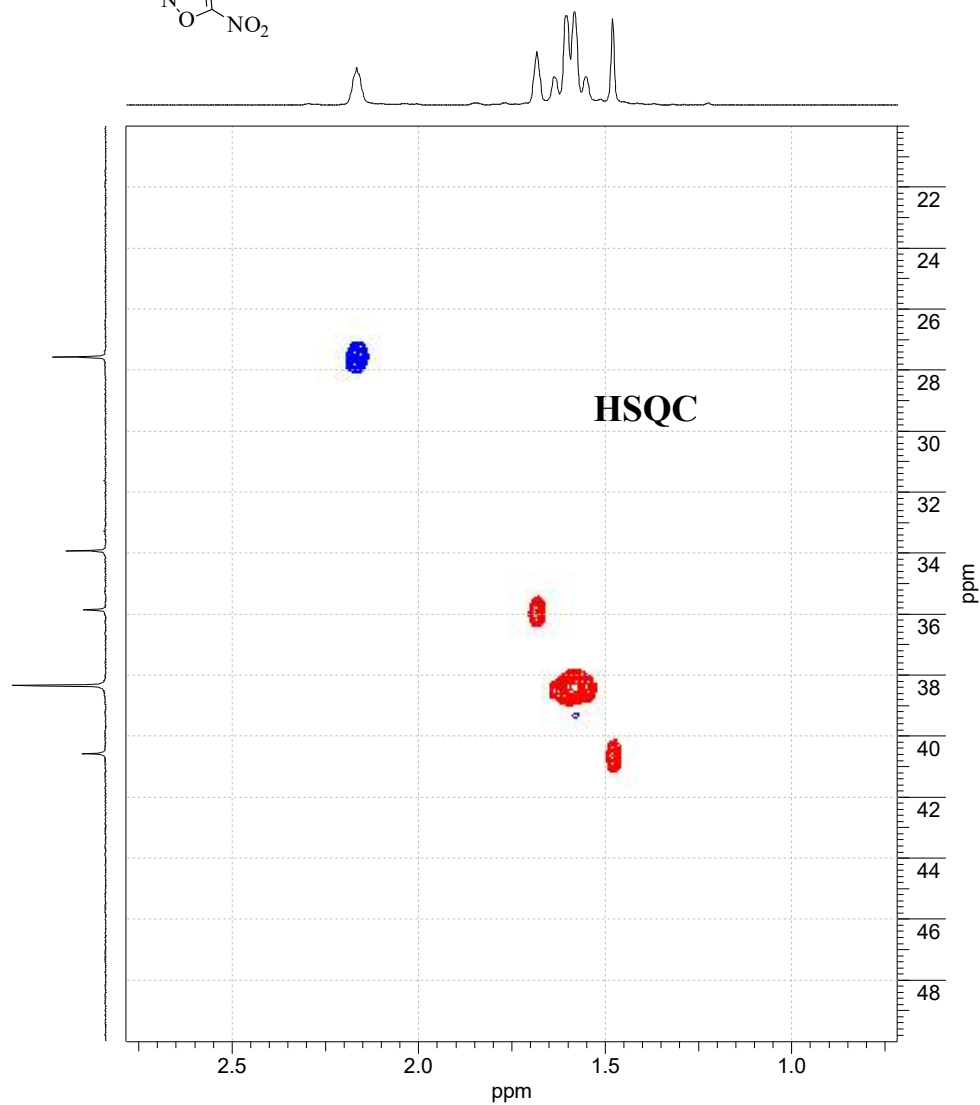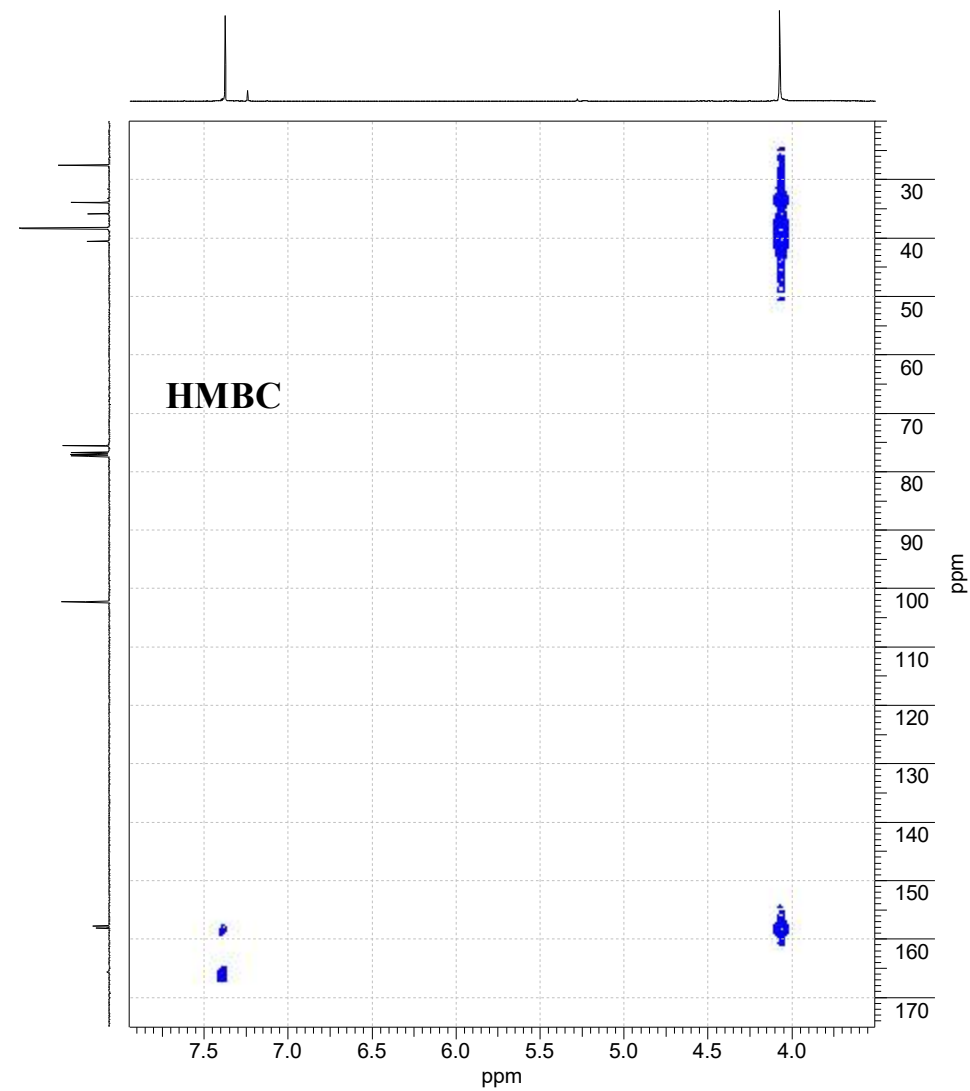

((3s,7s)-7-[[5-Nitroisoxazol-3-yl)carbonyl]oxy}bicyclo[3.3.1]non-3-yl)methyl 5-nitroisoxazole-3-carboxylate **3h** ( $^1\text{H}$  NMR)

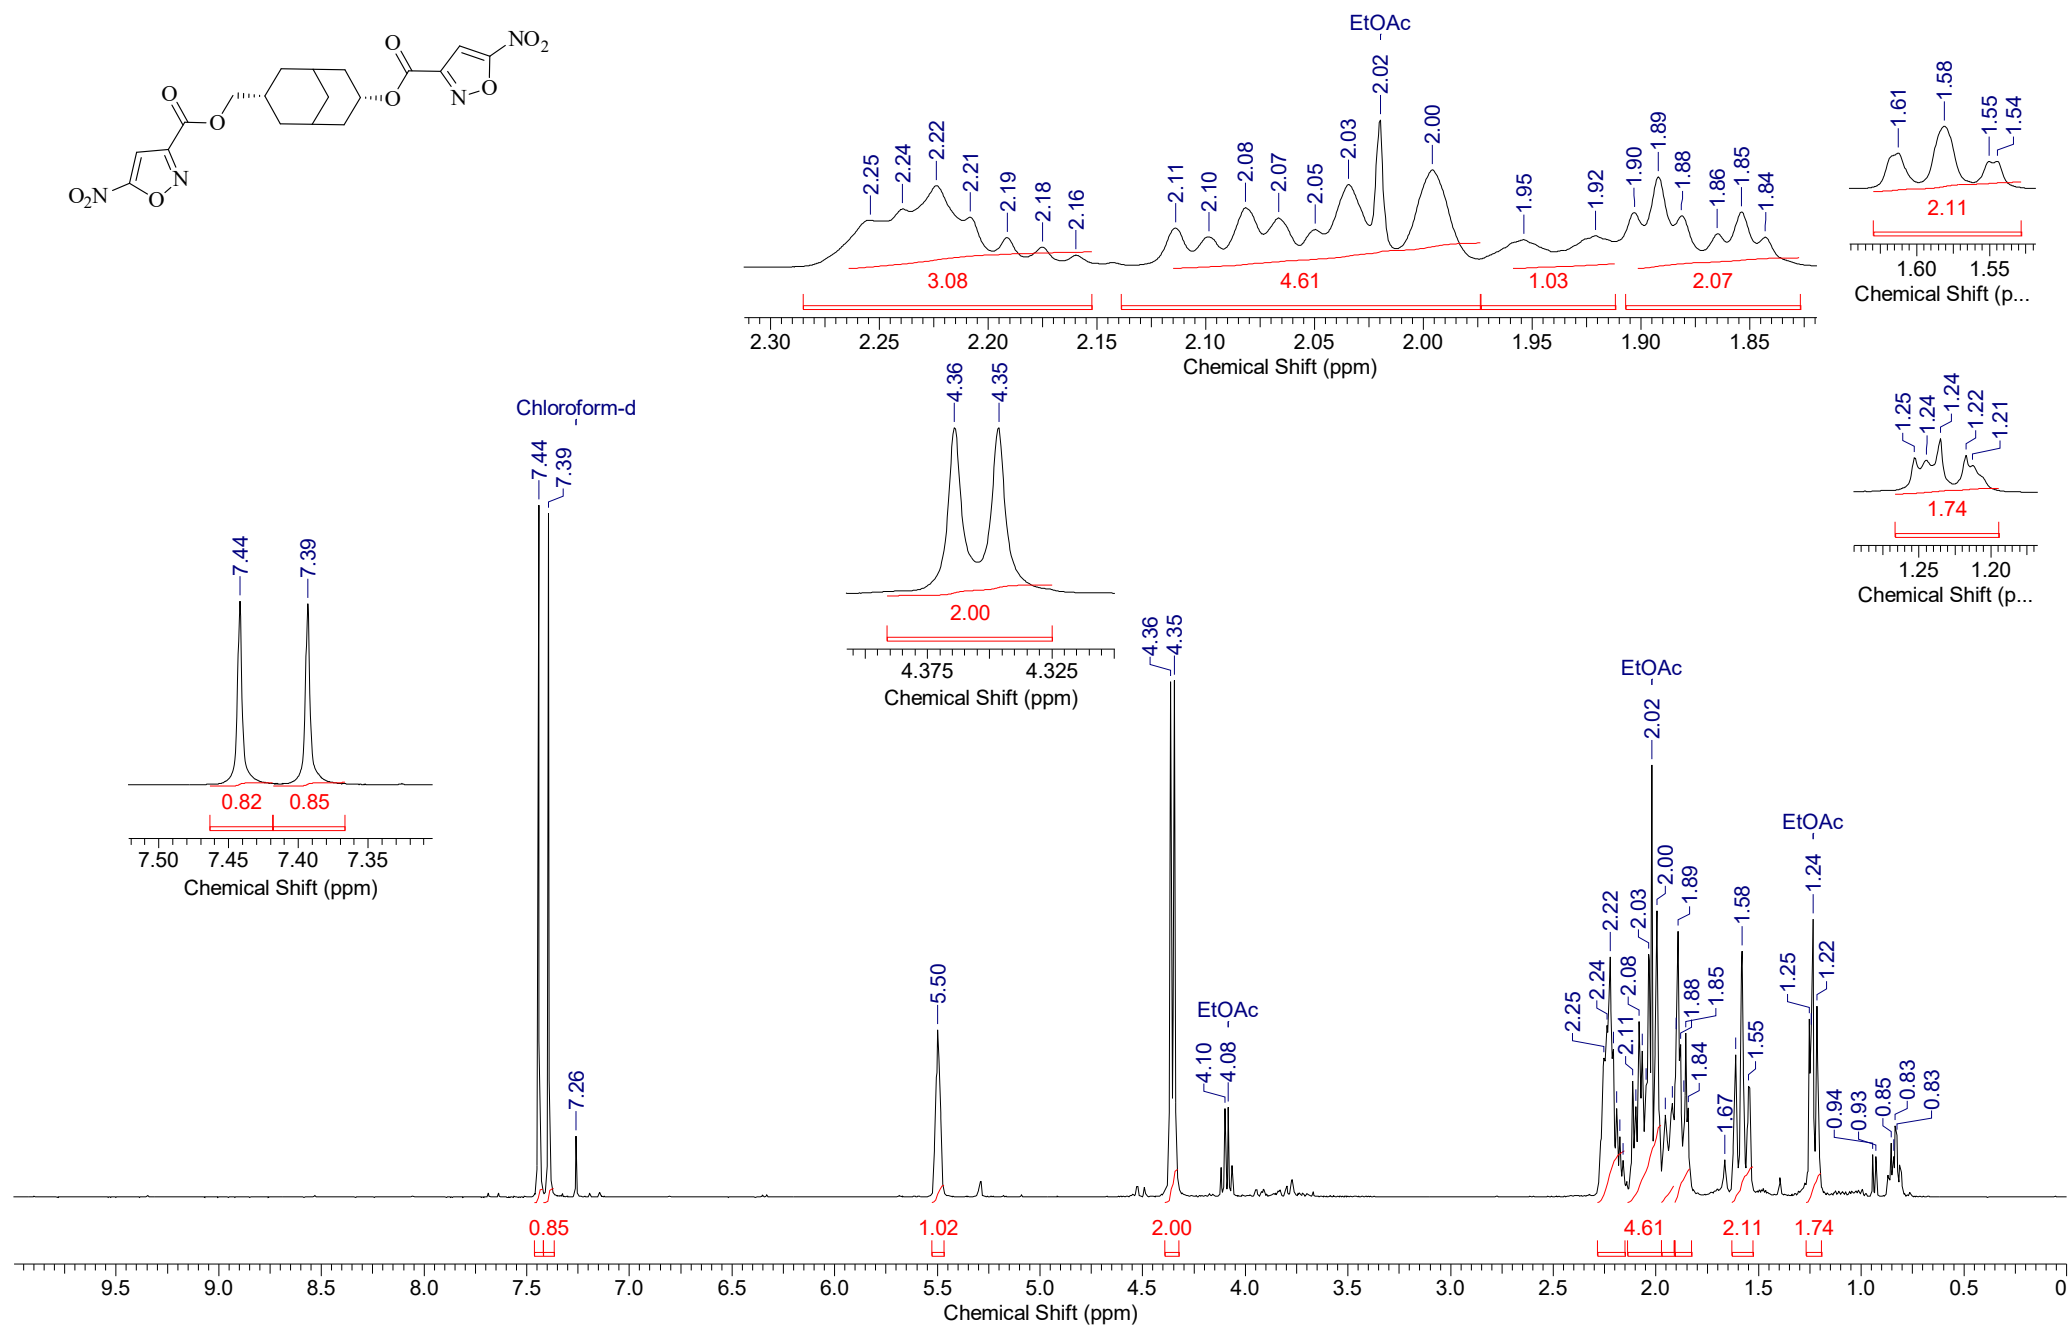

((3*s*,7*s*)-7-[[5-Nitroisoxazol-3-yl)carbonyl]oxy}bicyclo[3.3.1]non-3-yl)methyl 5-nitroisoxazole-3-carboxylate **3h** ( $^{13}\text{C}$  NMR)

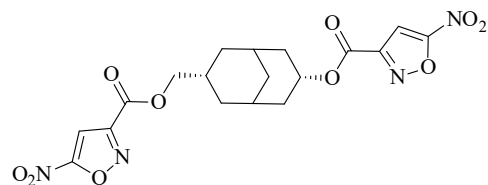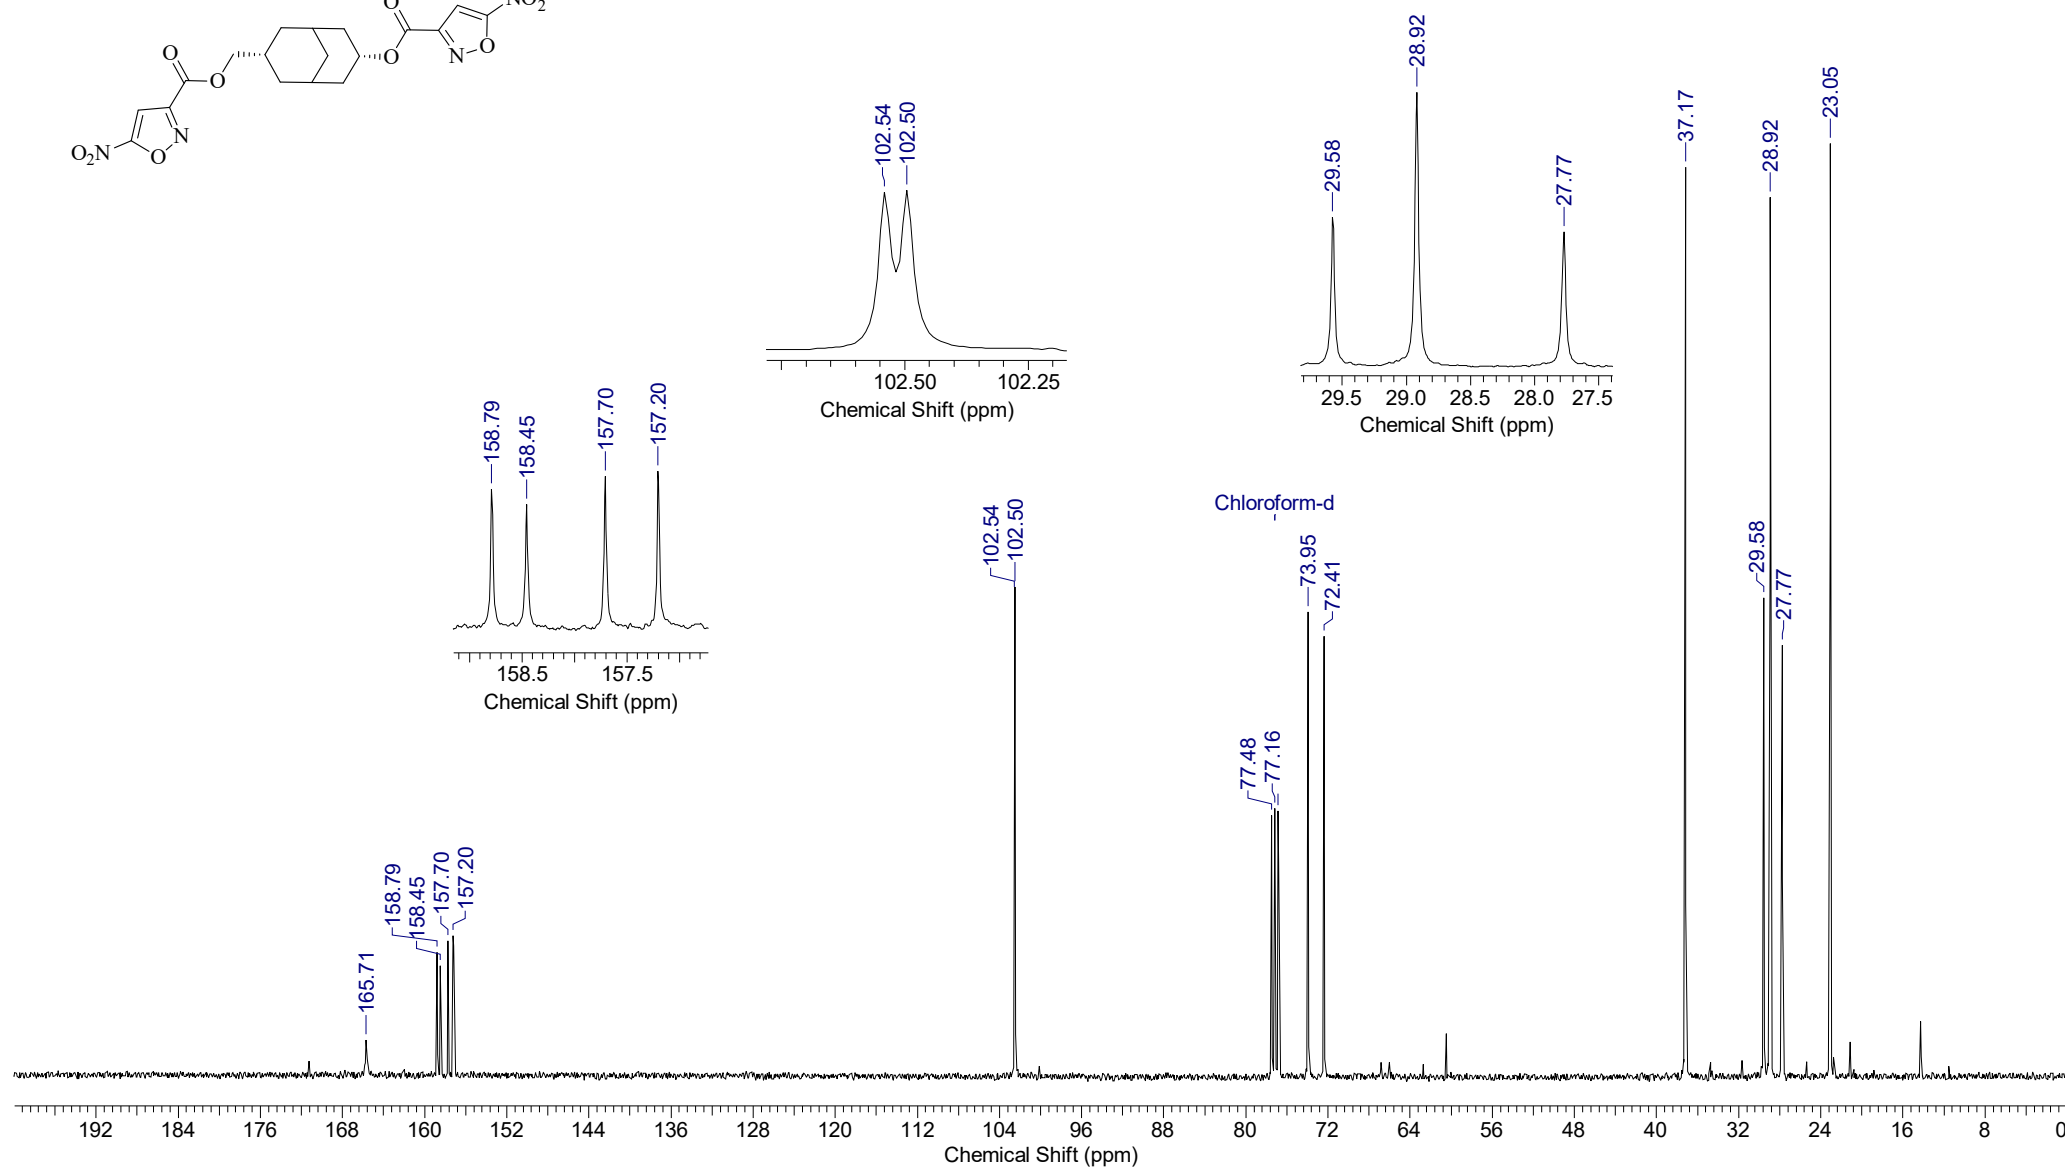

((3*s*,7*s*)-7-[[5-Nitroisoxazol-3-yl]carbonyl]oxy}bicyclo[3.3.1]non-3-yl)methyl 5-nitroisoxazole-3-carboxylate **3h** (HSQC)

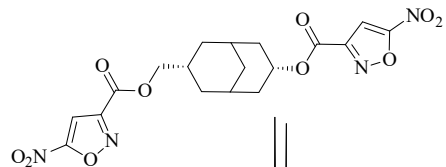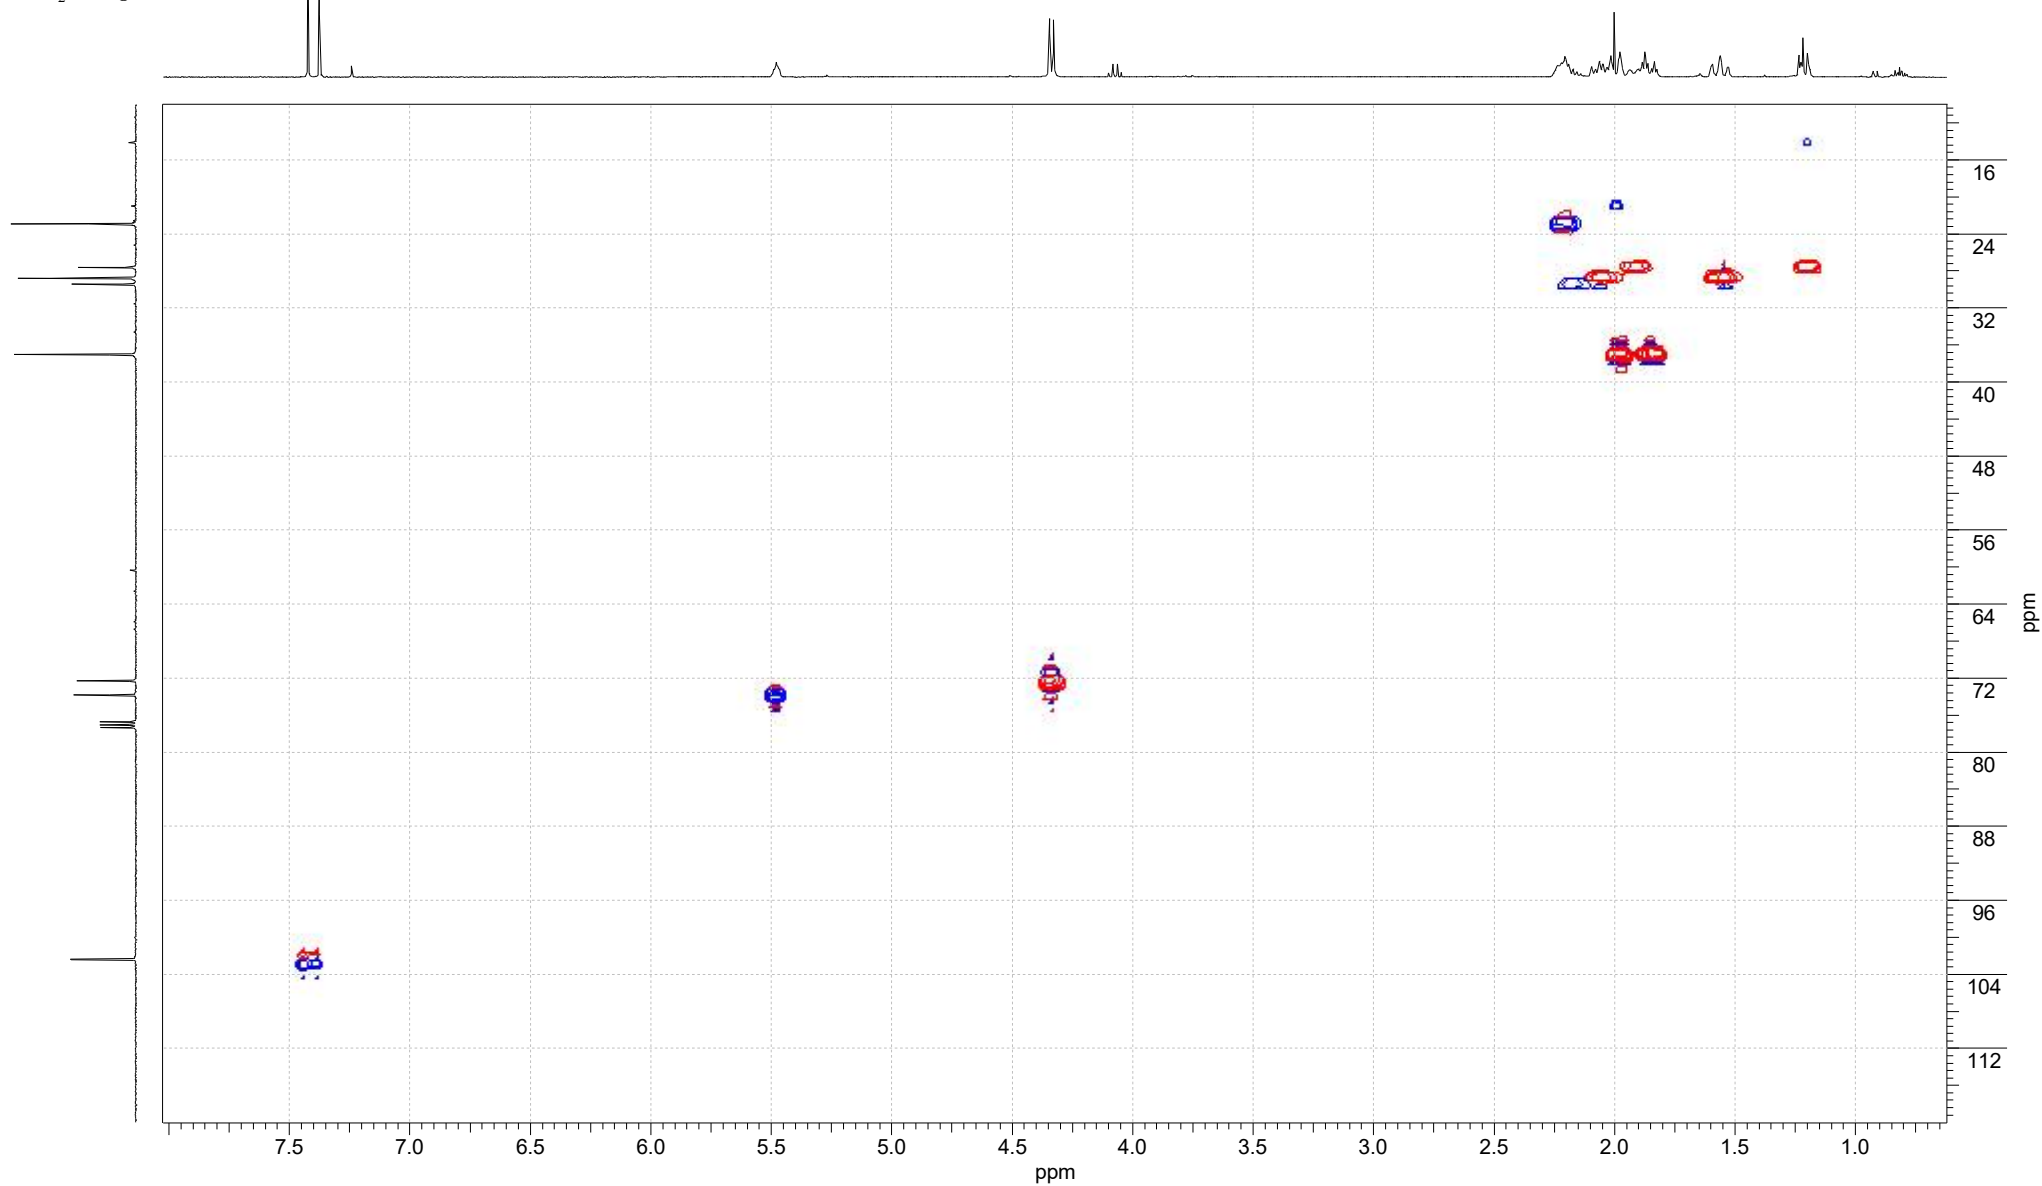

((3*s*,7*s*)-7-[[5-Nitroisoxazol-3-yl)carbonyl]oxy}bicyclo[3.3.1]non-3-yl)methyl 5-nitroisoxazole-3-carboxylate **3h** (HMBC)

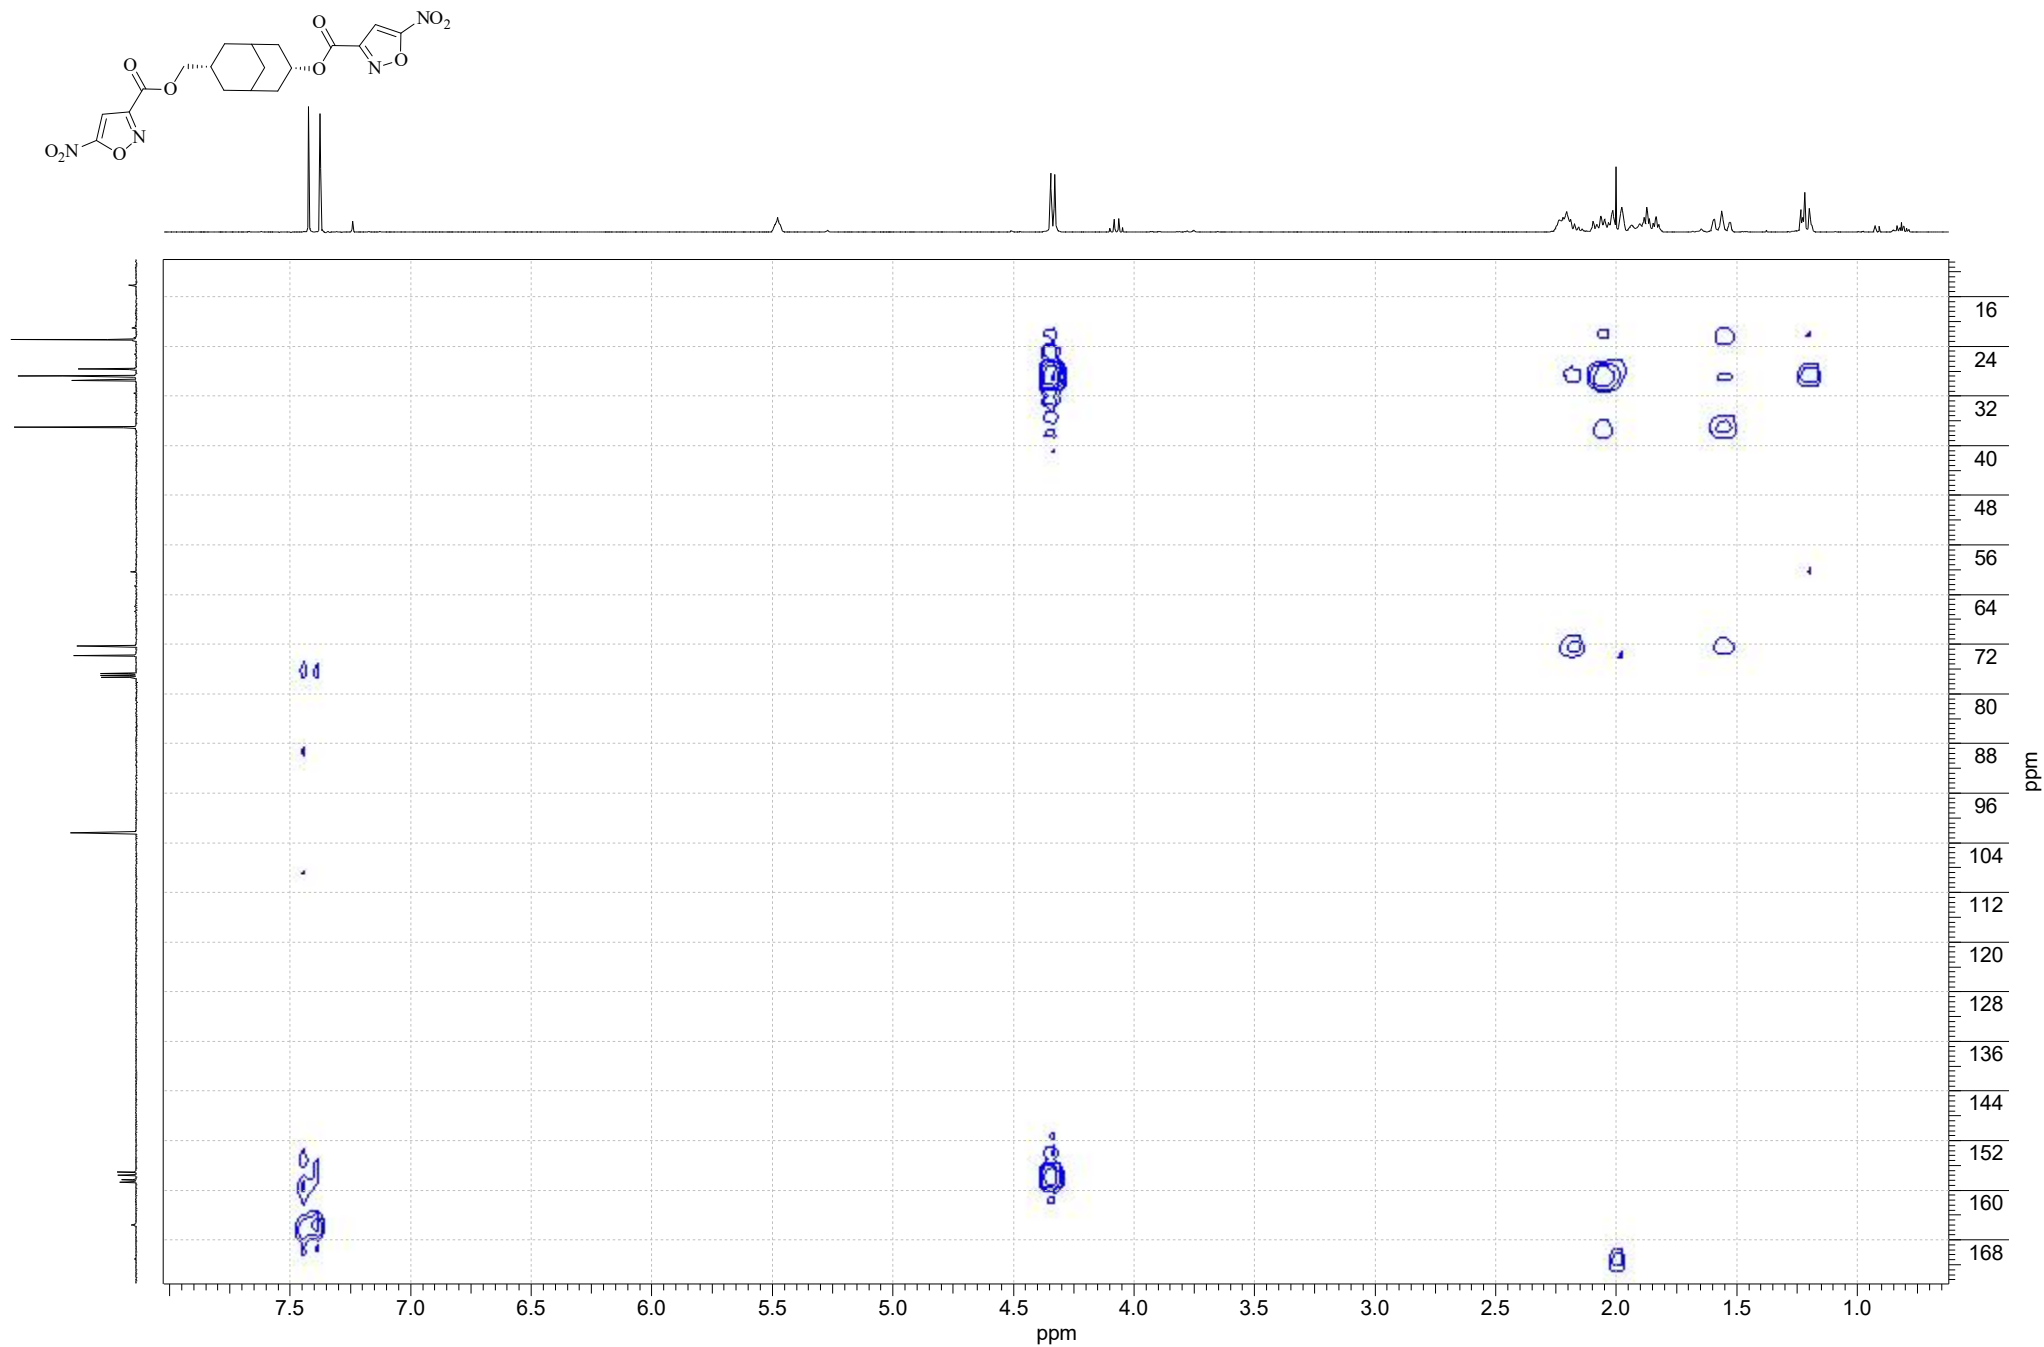

((1*r*,3*s*,5*R*,7*S*)-3(((Cyanocarbonyl)oxy)methyl)adamantan-1-yl)methyl 5-nitroisoxazole-3-carboxylate, **4** ( $^1\text{H}$  NMR)

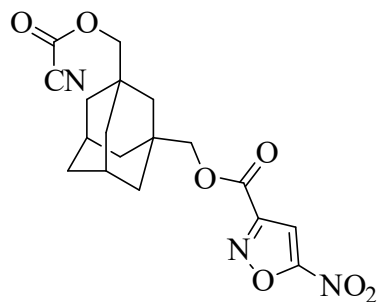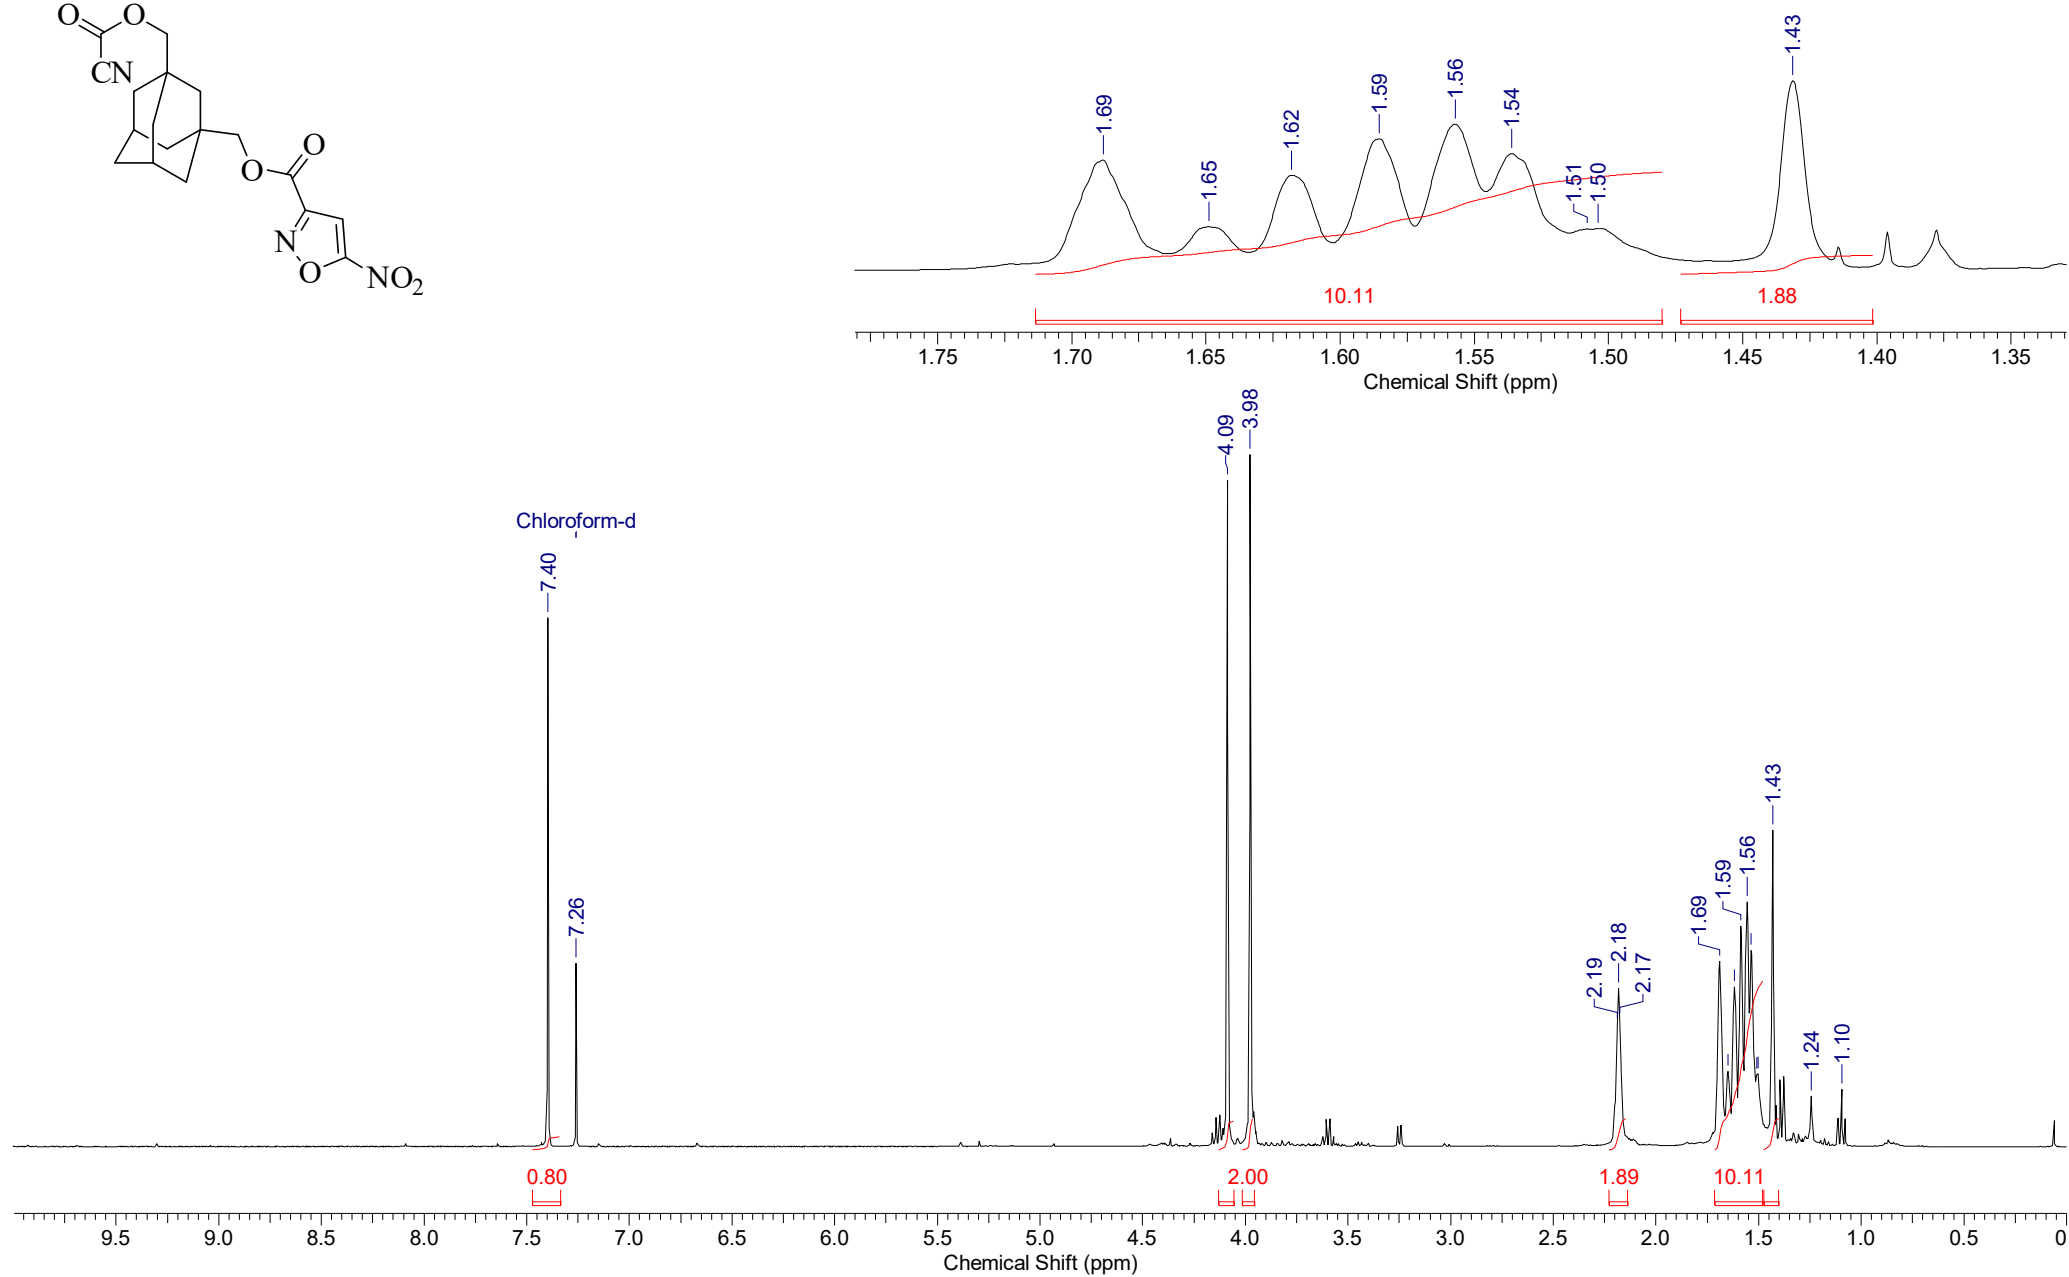

((1*r*,3*s*,5*R*,7*S*)-3(((Cyanocarbonyl)oxy)methyl)adamantan-1-yl)methyl 5-nitroisoxazole-3-carboxylate, **4** ( $^{13}\text{C}$  NMR)

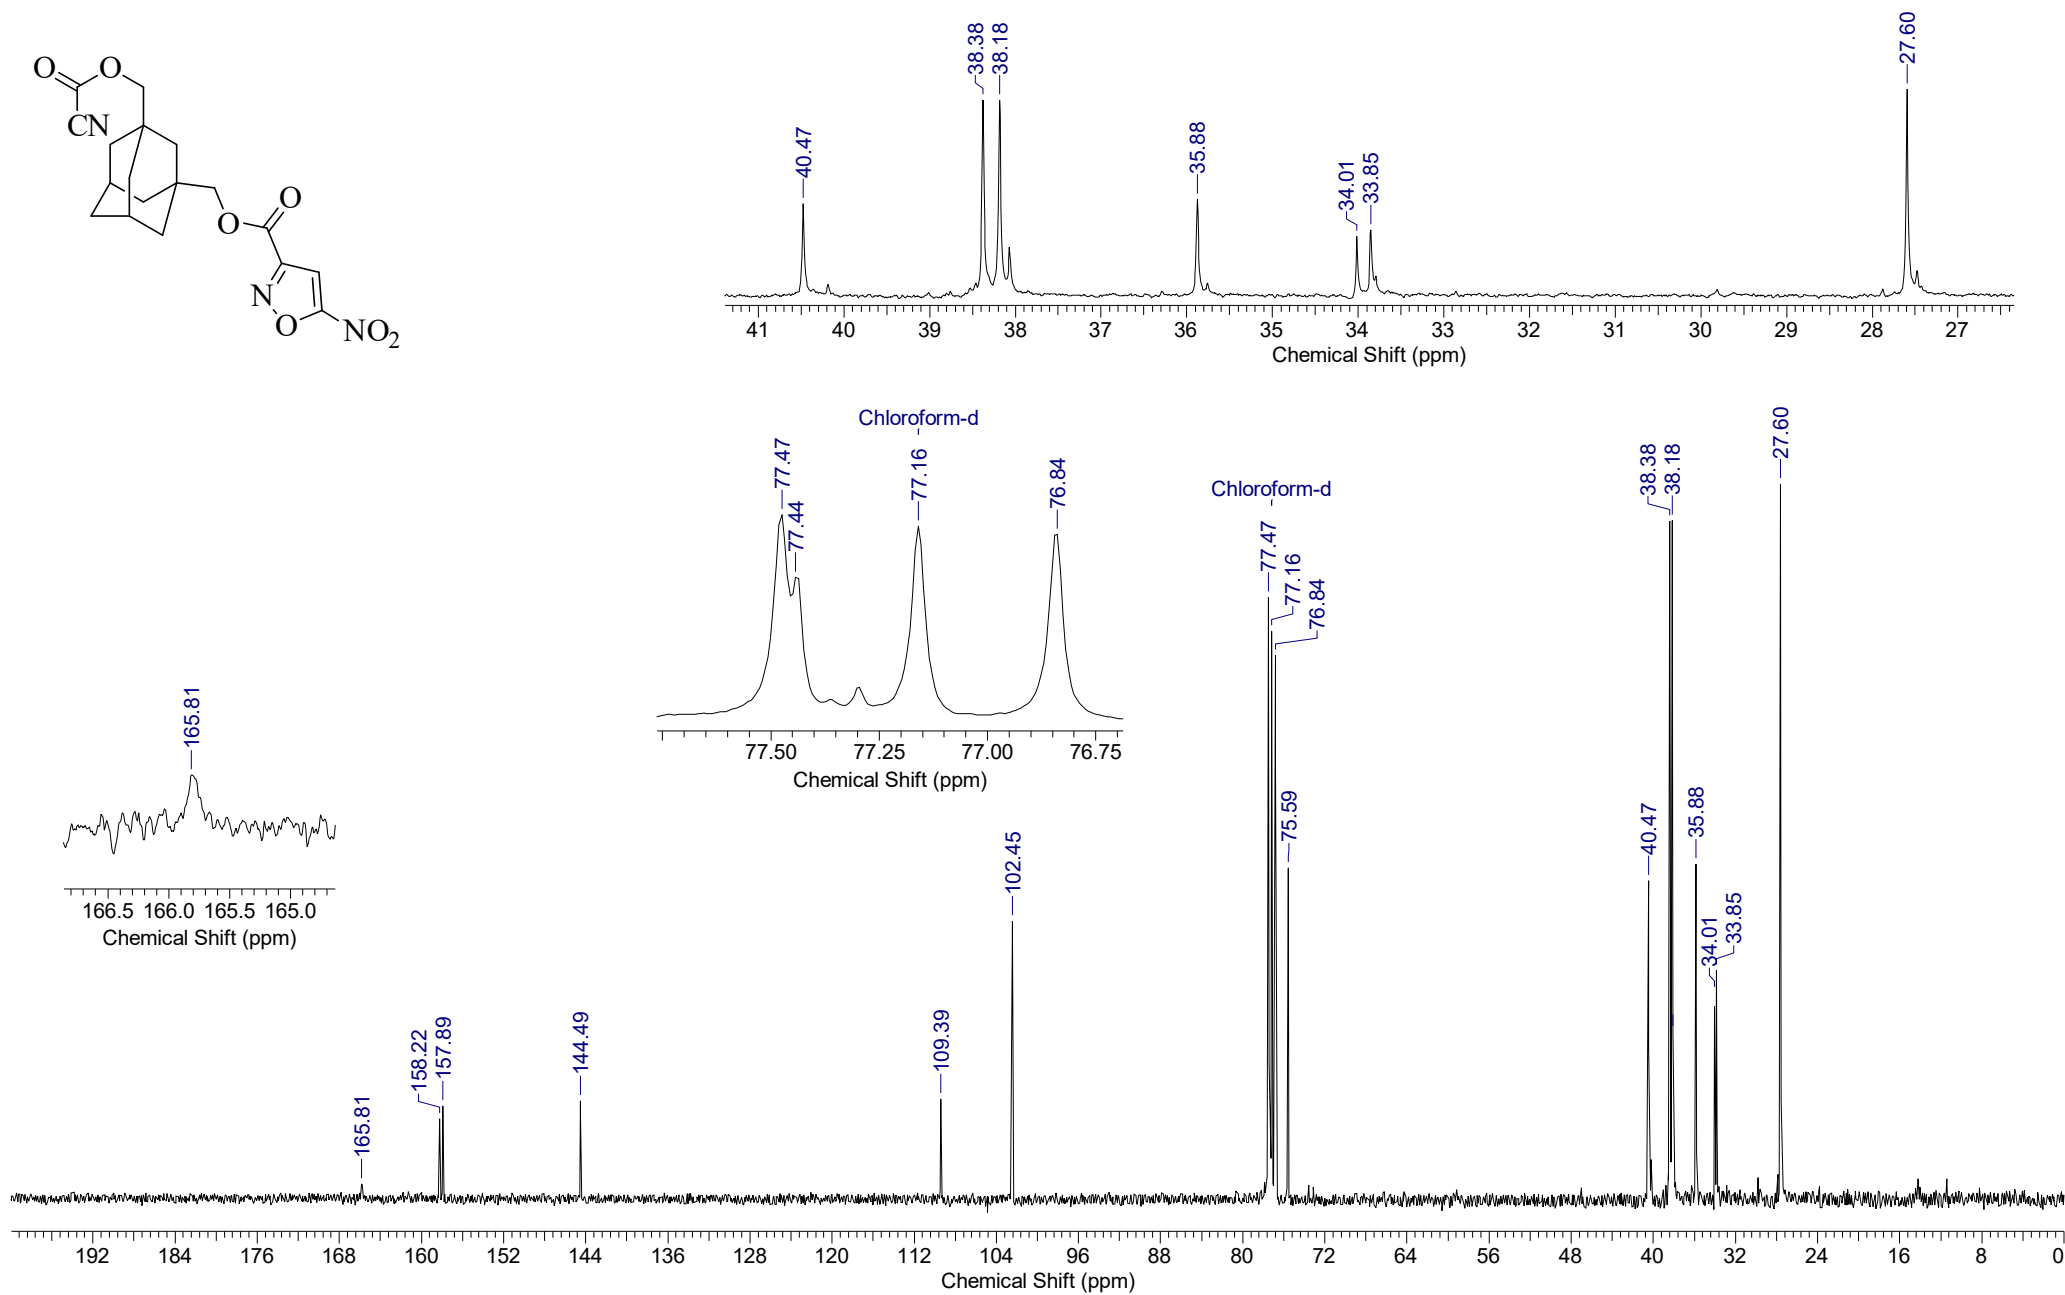

((1*r*,3*s*,5*R*,7*S*)-3(((Cyanocarbonyl)oxy)methyl)adamantan-1-yl)methyl 5-nitroisoxazole-3-carboxylate, **4** (HSQC)

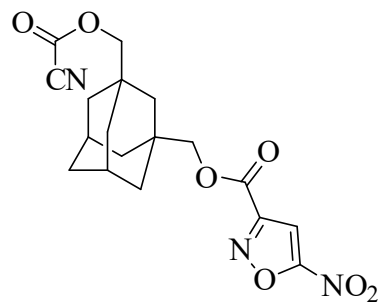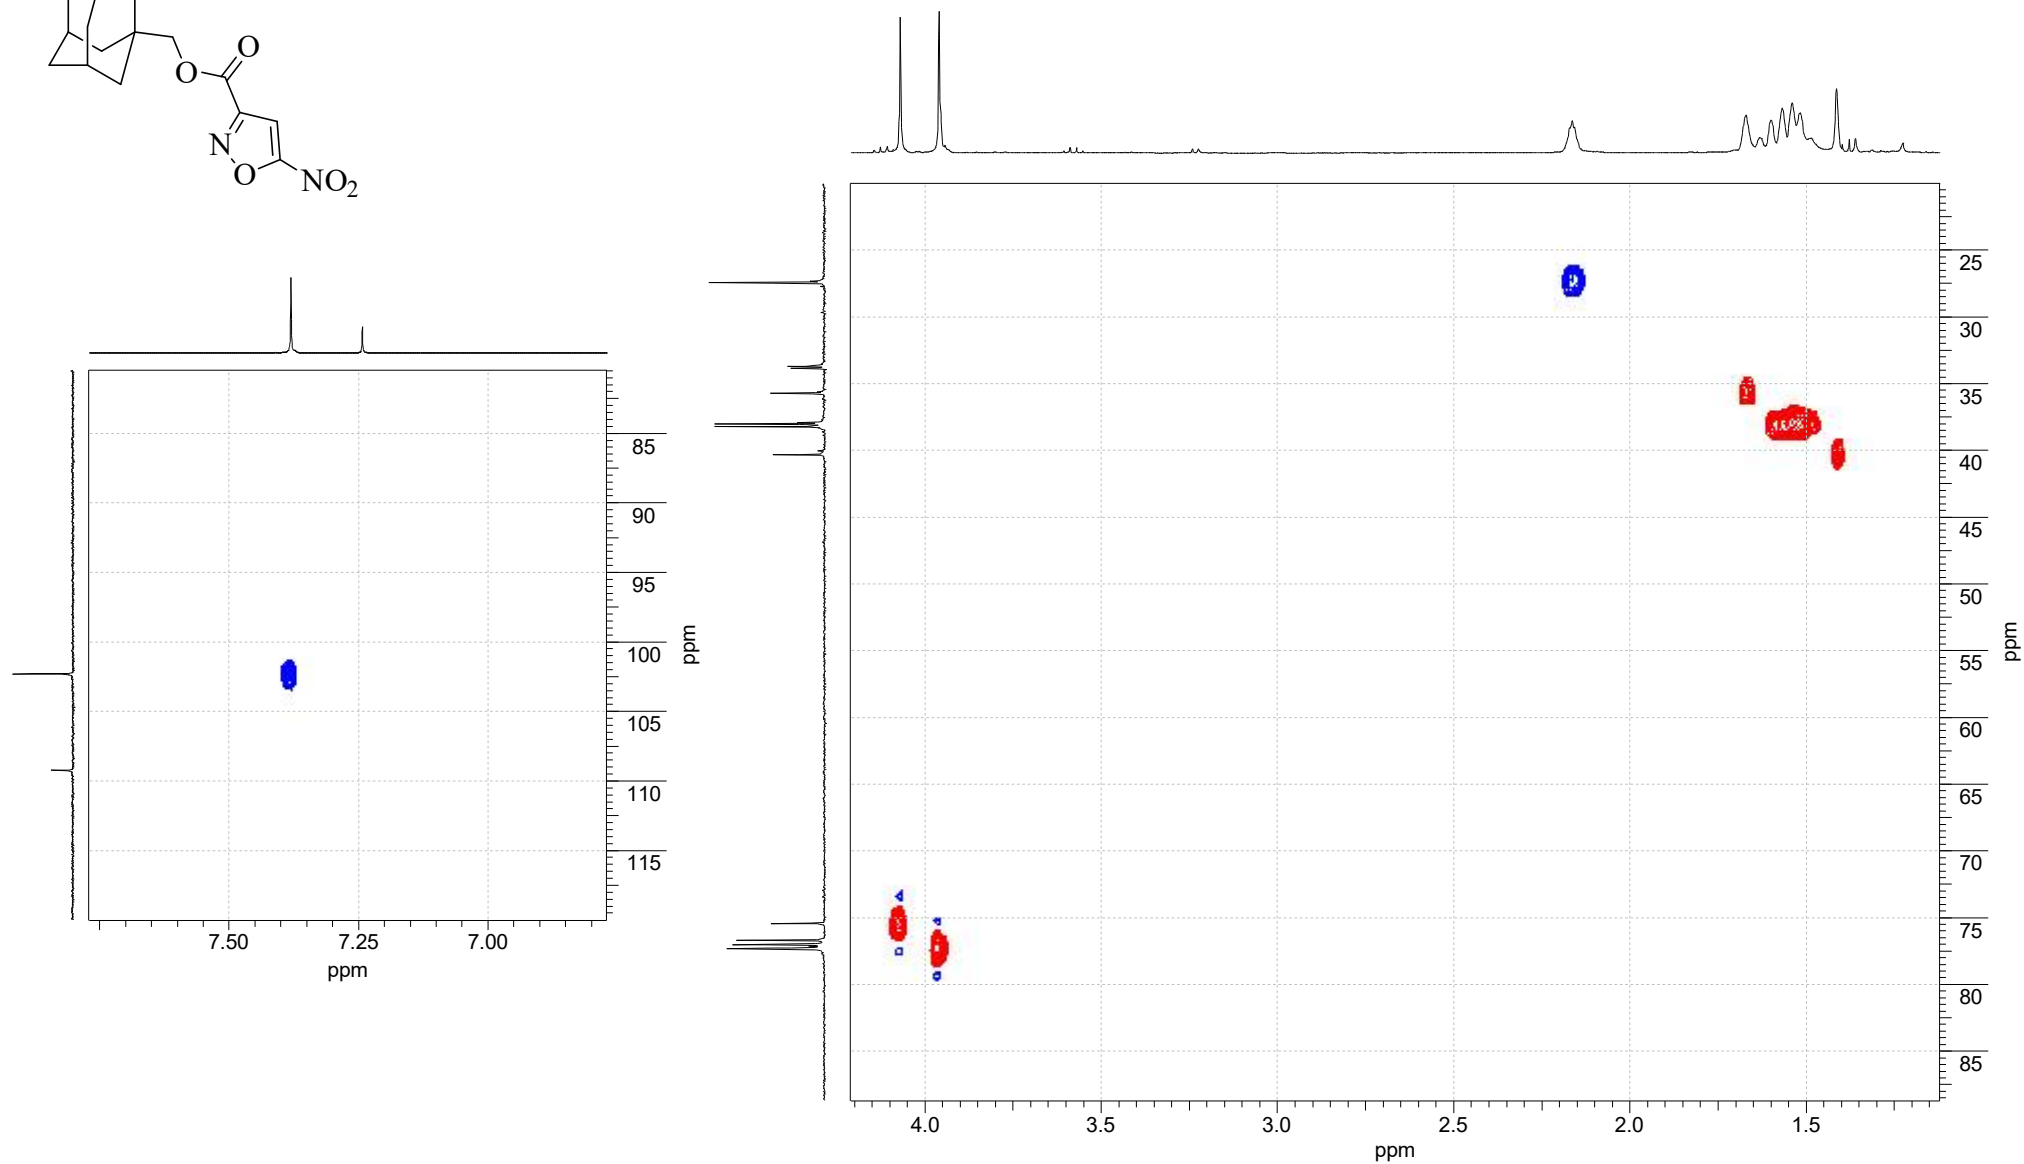



# 1,4-Phenylene bis(4,4,4-trinitrobutanoate) **5a** ( $^1\text{H}$ NMR)

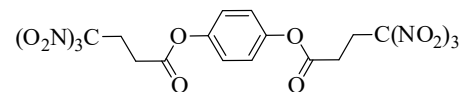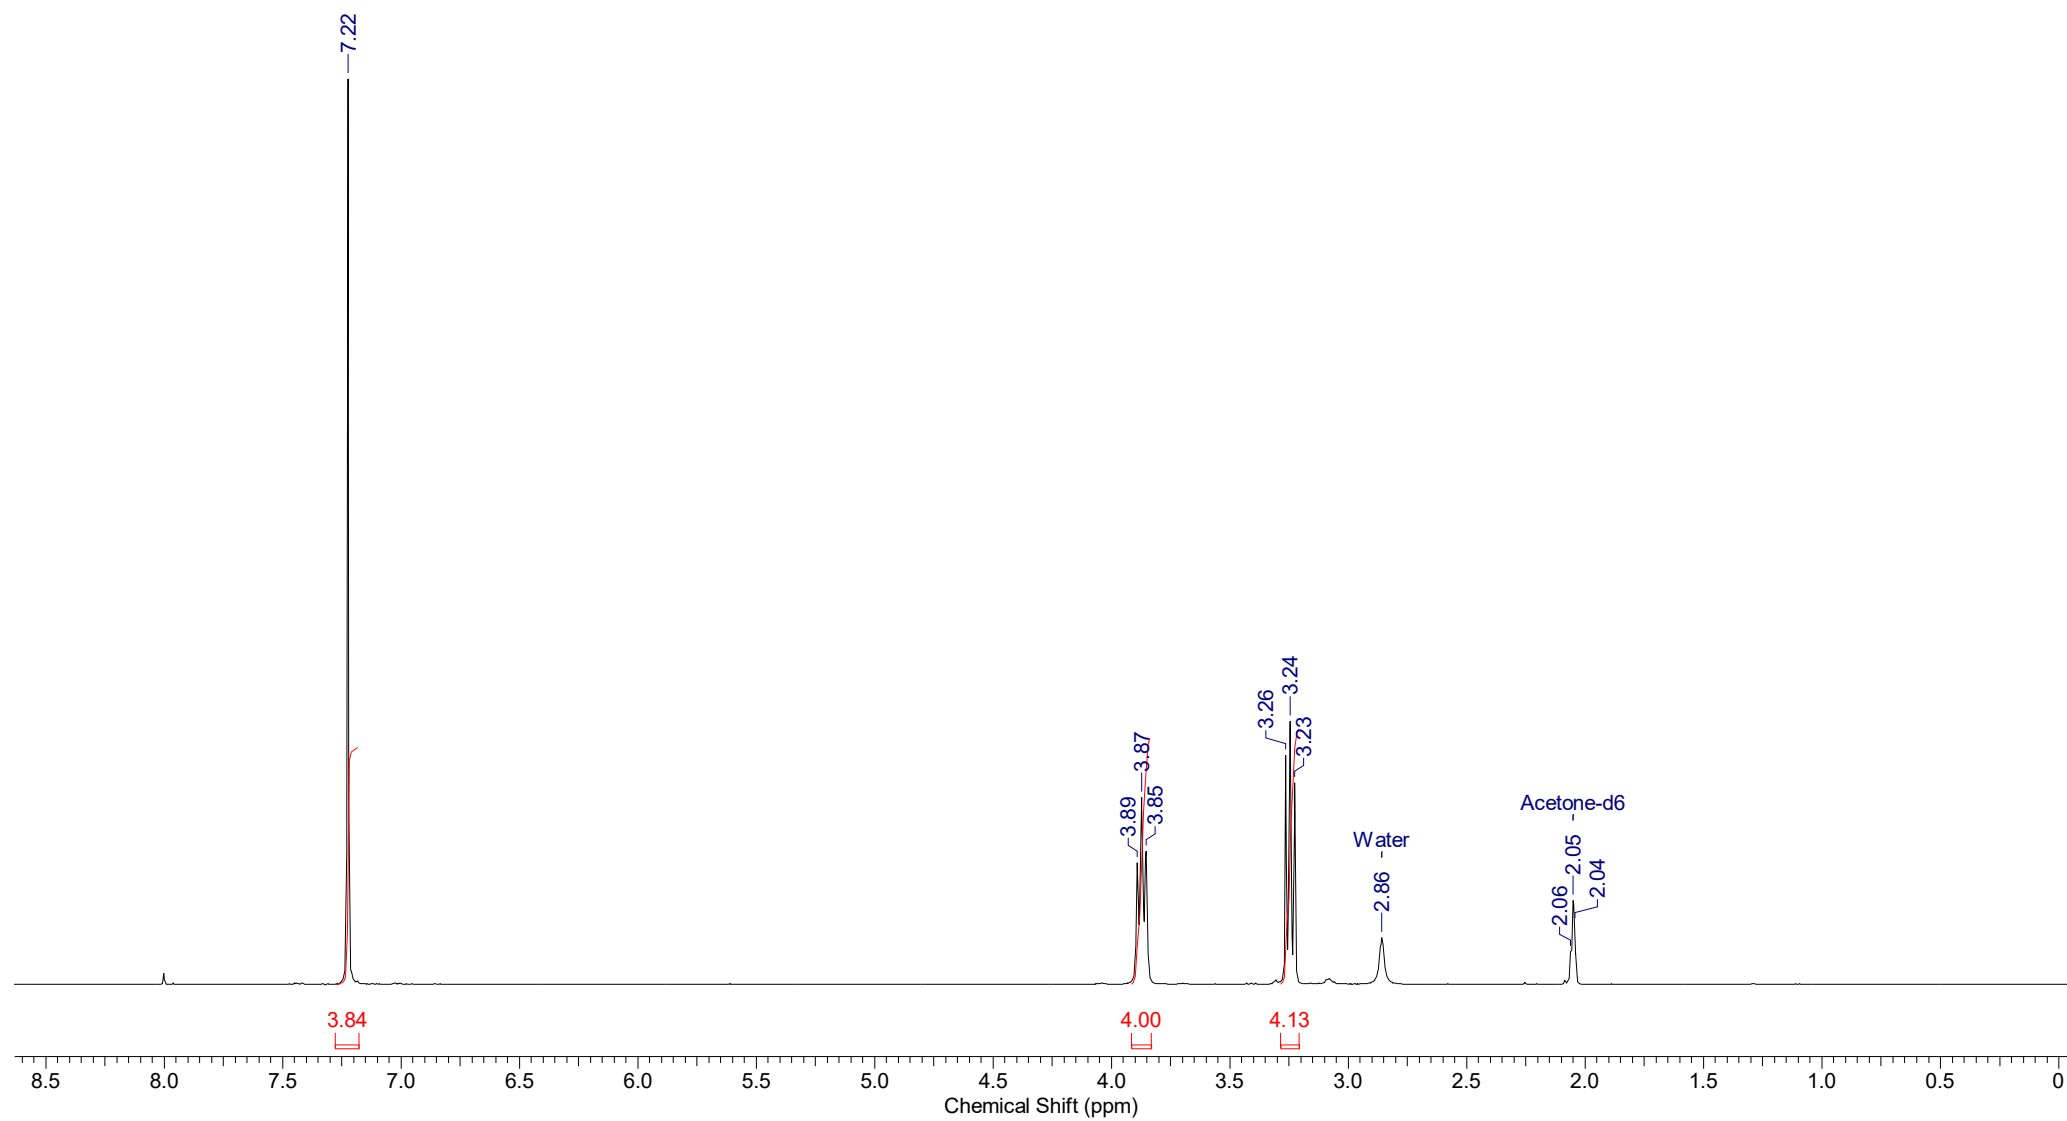

# 1,4-Phenylene bis(4,4,4-trinitrobutanoate) **5a** ( $^{13}\text{C}$ NMR)

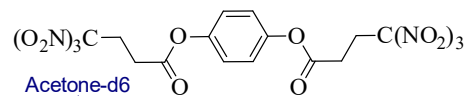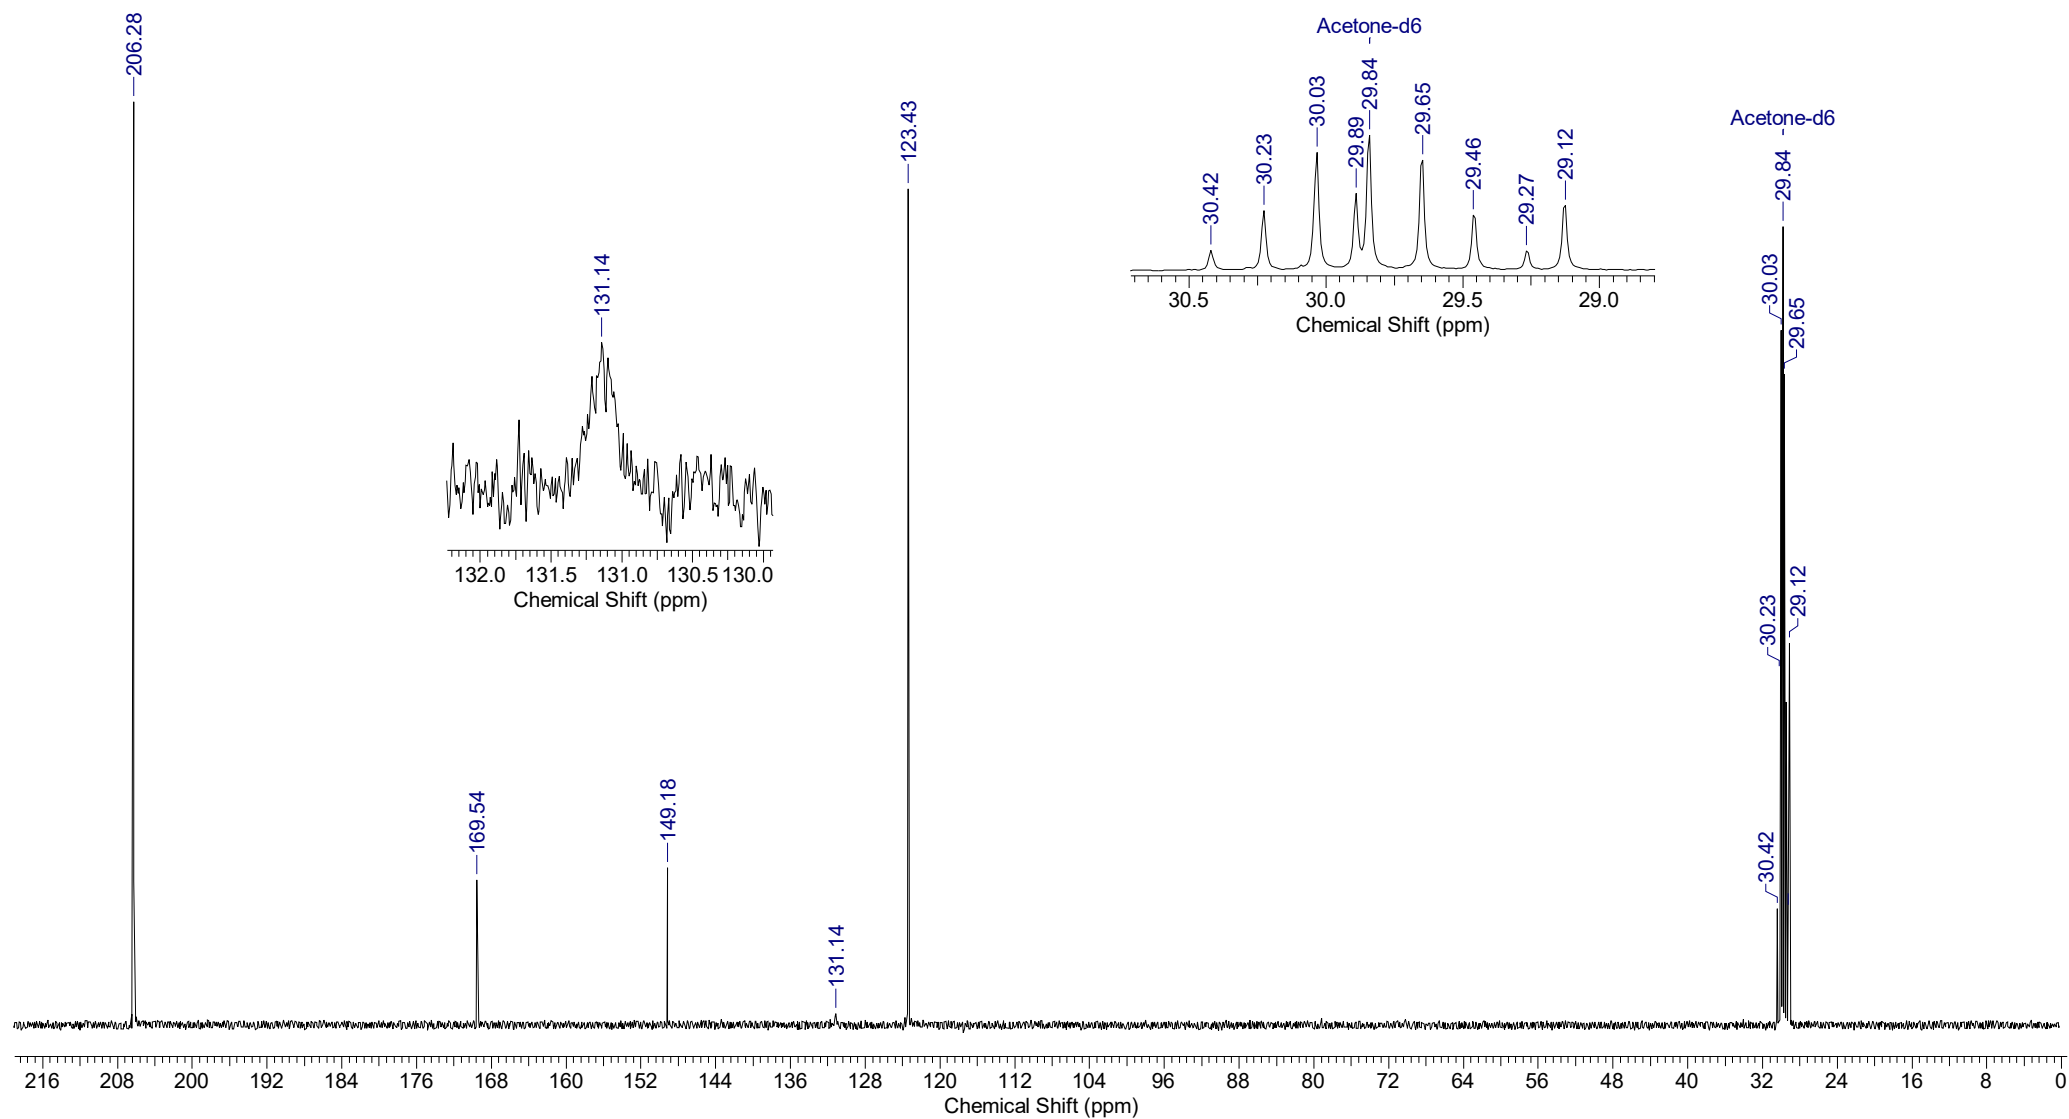

# 1,4-Phenylene bis(4,4,4-trinitrobutanoate) **5a** (APT)

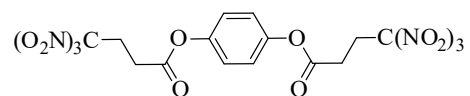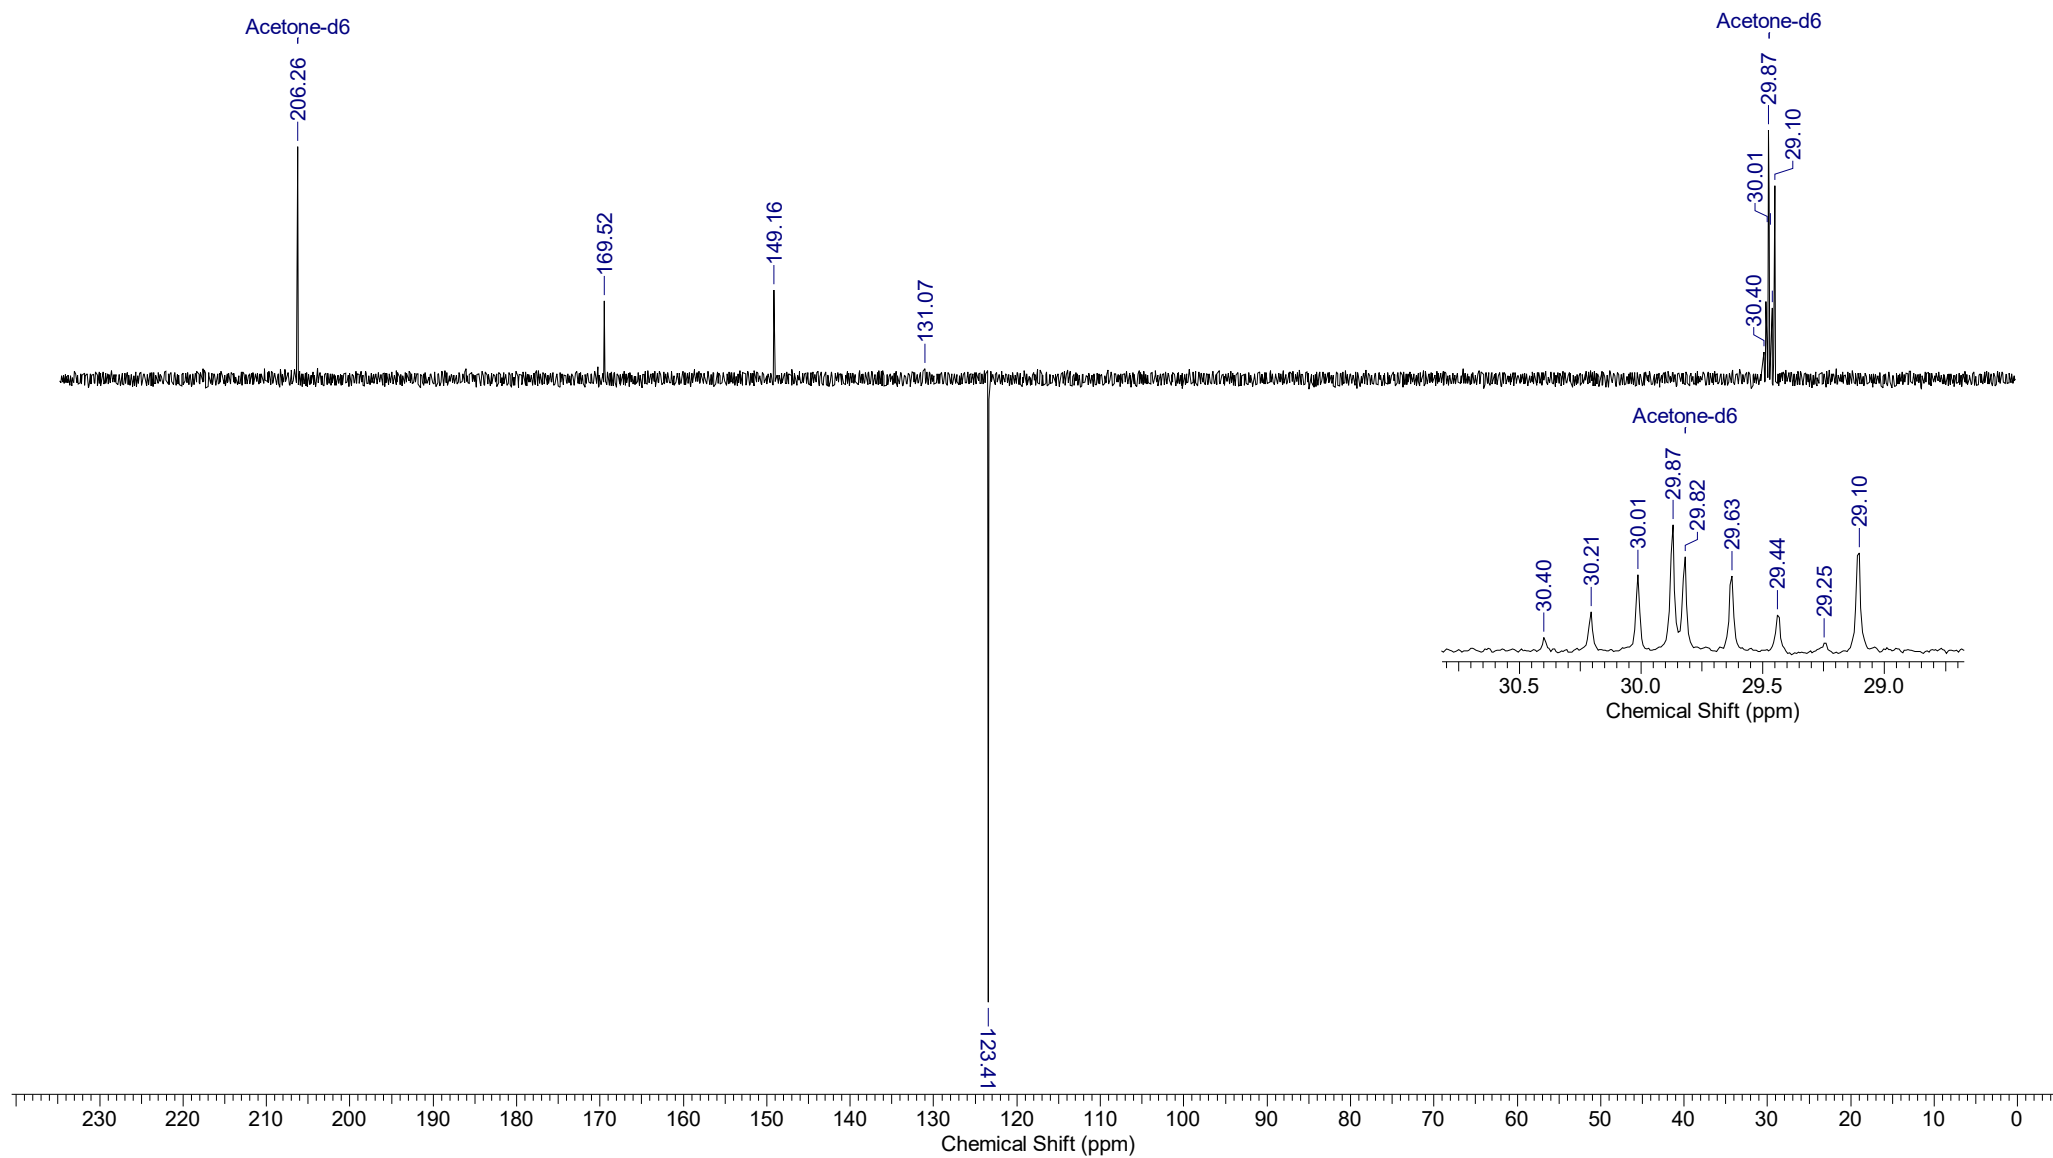

# 4-(Adamantan-1-yl)phenyl 4,4,4-trinitrobutanoate, **5b** ( $^1\text{H}$ NMR)

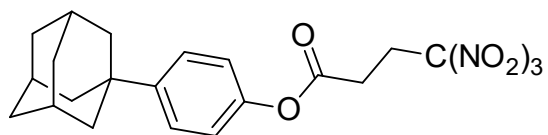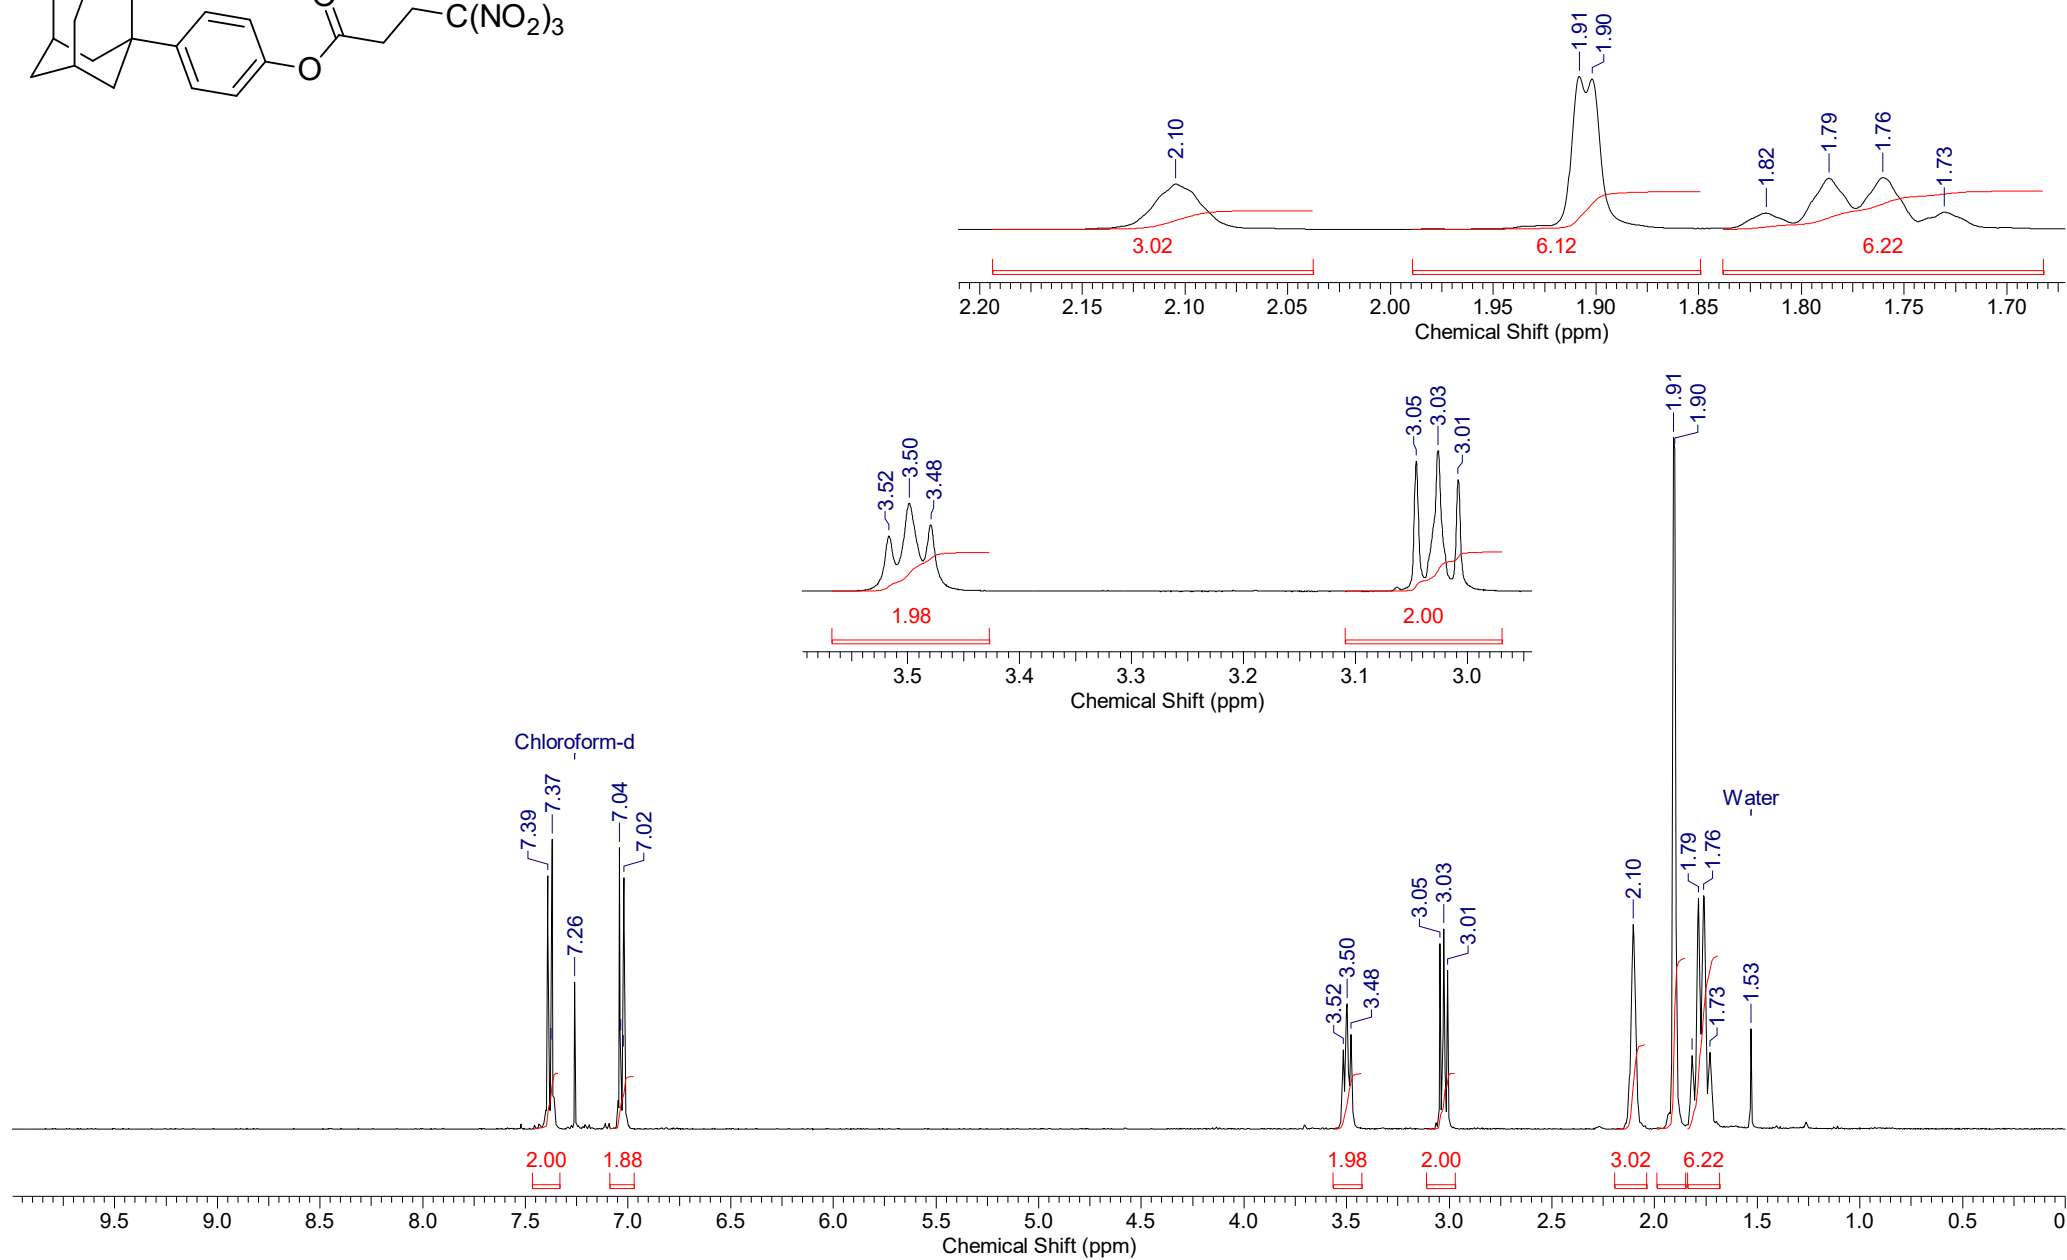

4-(Adamantan-1-yl)phenyl 4,4,4-trinitrobutanoate, **5b** ( $^{13}\text{C}$  NMR)

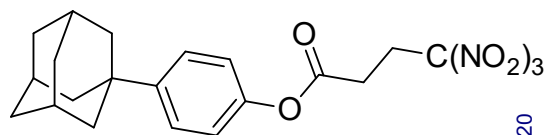

# 1,4-Phenylenedi(methylene) bis(5-aminoisoxazole-3-carboxylate) **6** ( $^1\text{H}$ NMR)

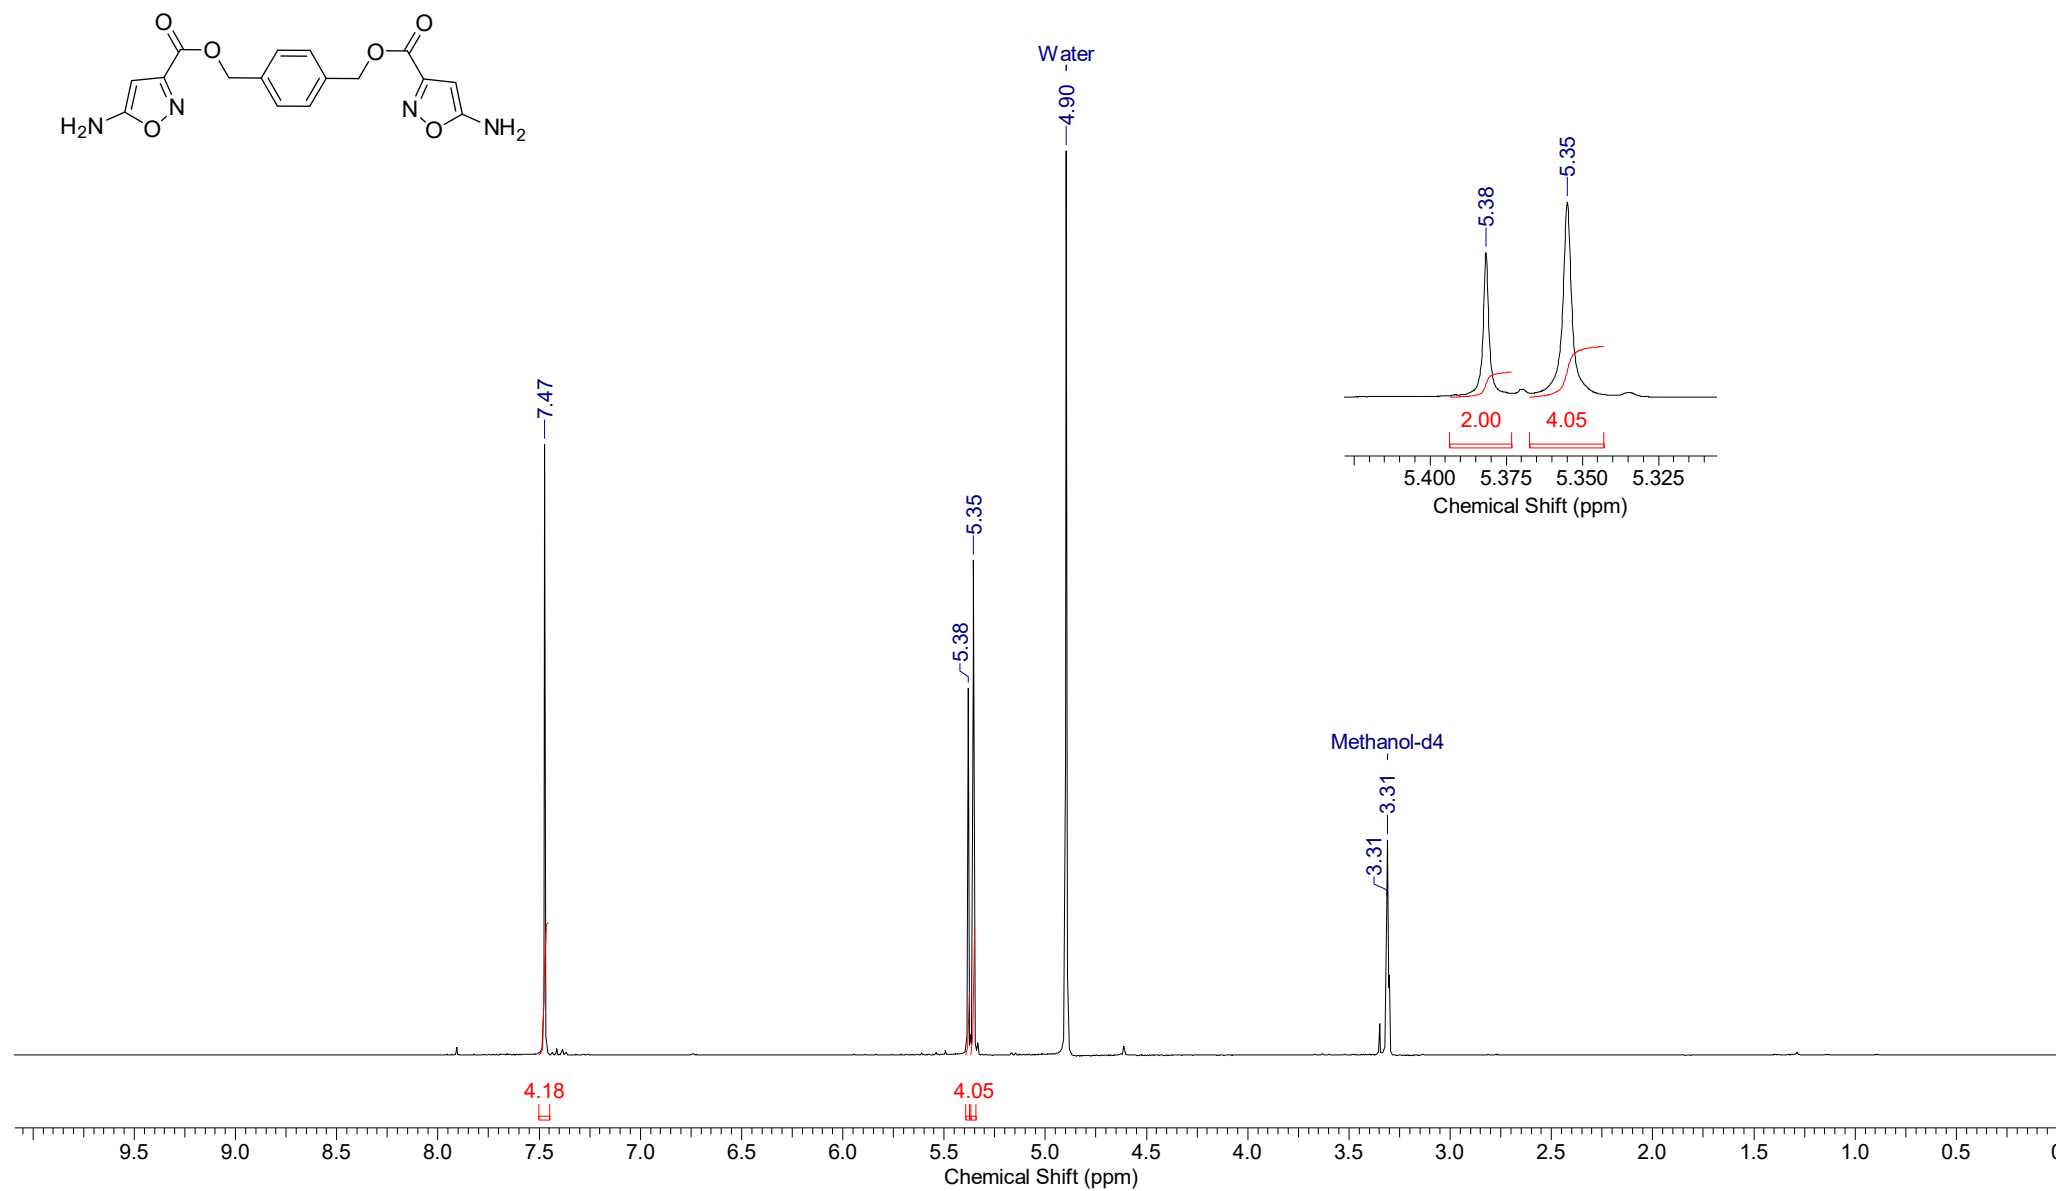

# 1,4-Phenylenedi(methylene) bis(5-aminoisoxazole-3-carboxylate) **6** ( $^{13}\text{C}$ NMR)

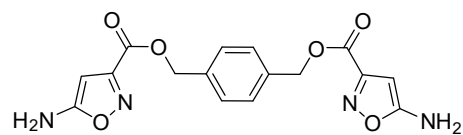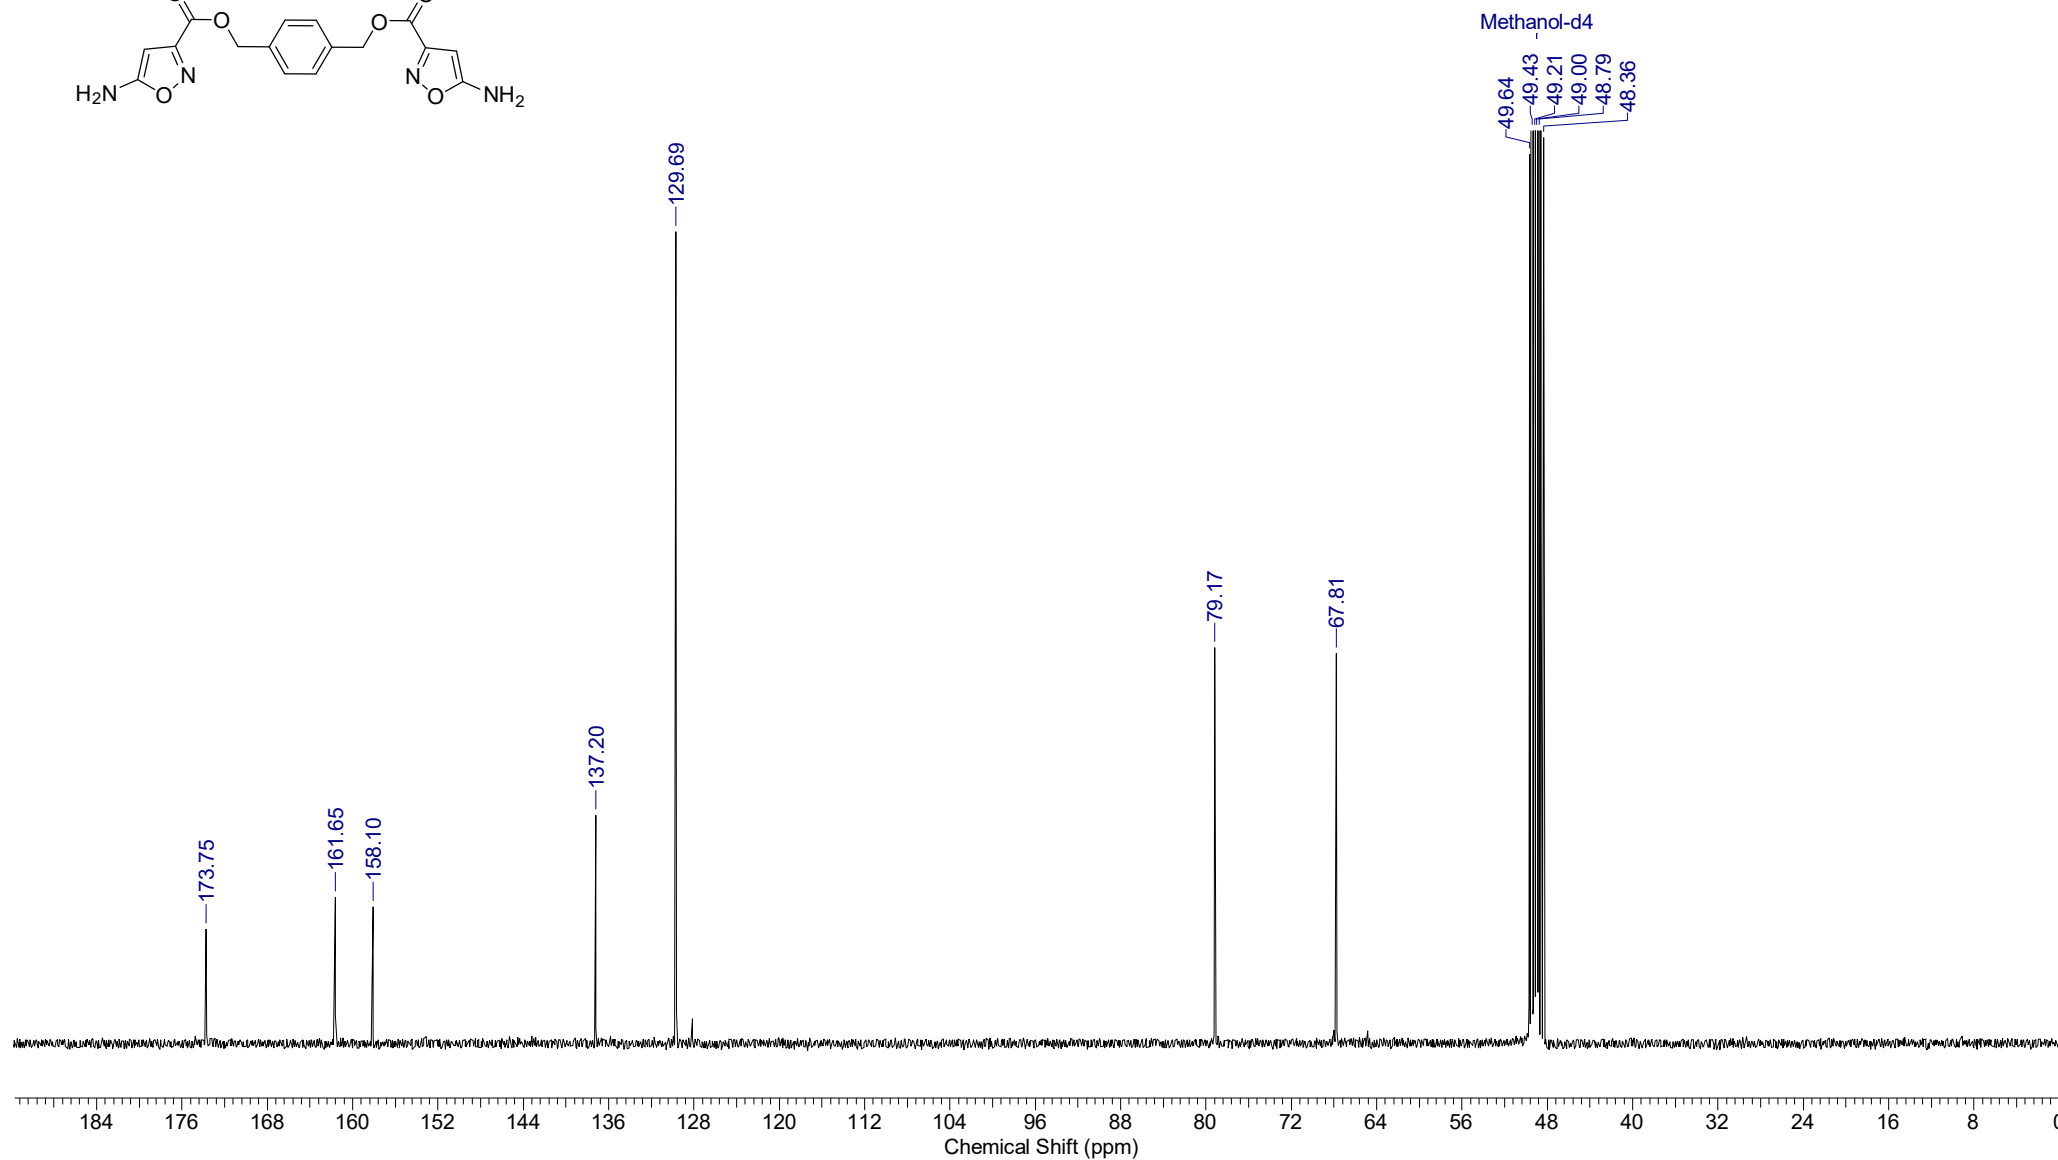

# Butane-1,4-diyl bis(5-acetamidoisoxazole-3-carboxylate), **7** (<sup>1</sup>H NMR)

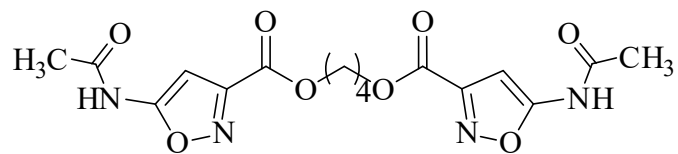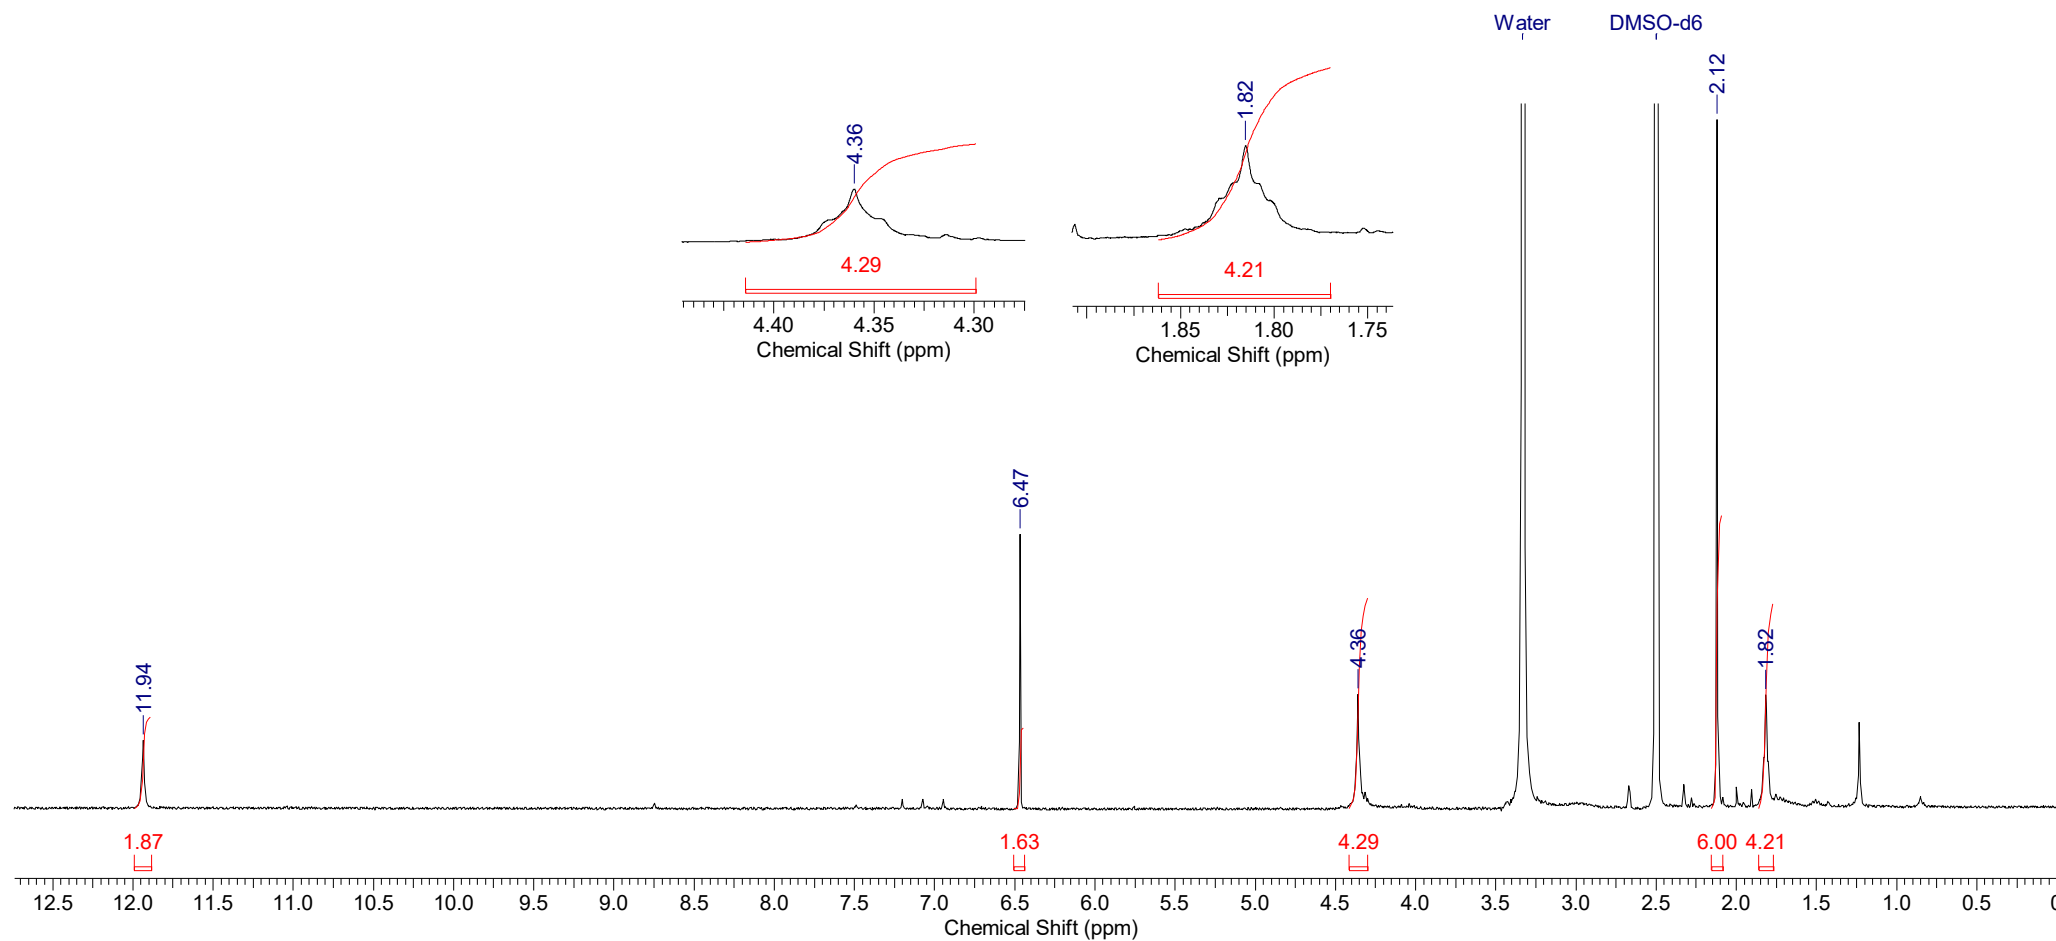



# Butane-1,4-diyl bis(5-acetamidoisoxazole-3-carboxylate), **7** ( $^{13}\text{C}$ NMR)

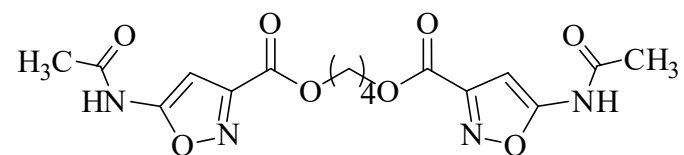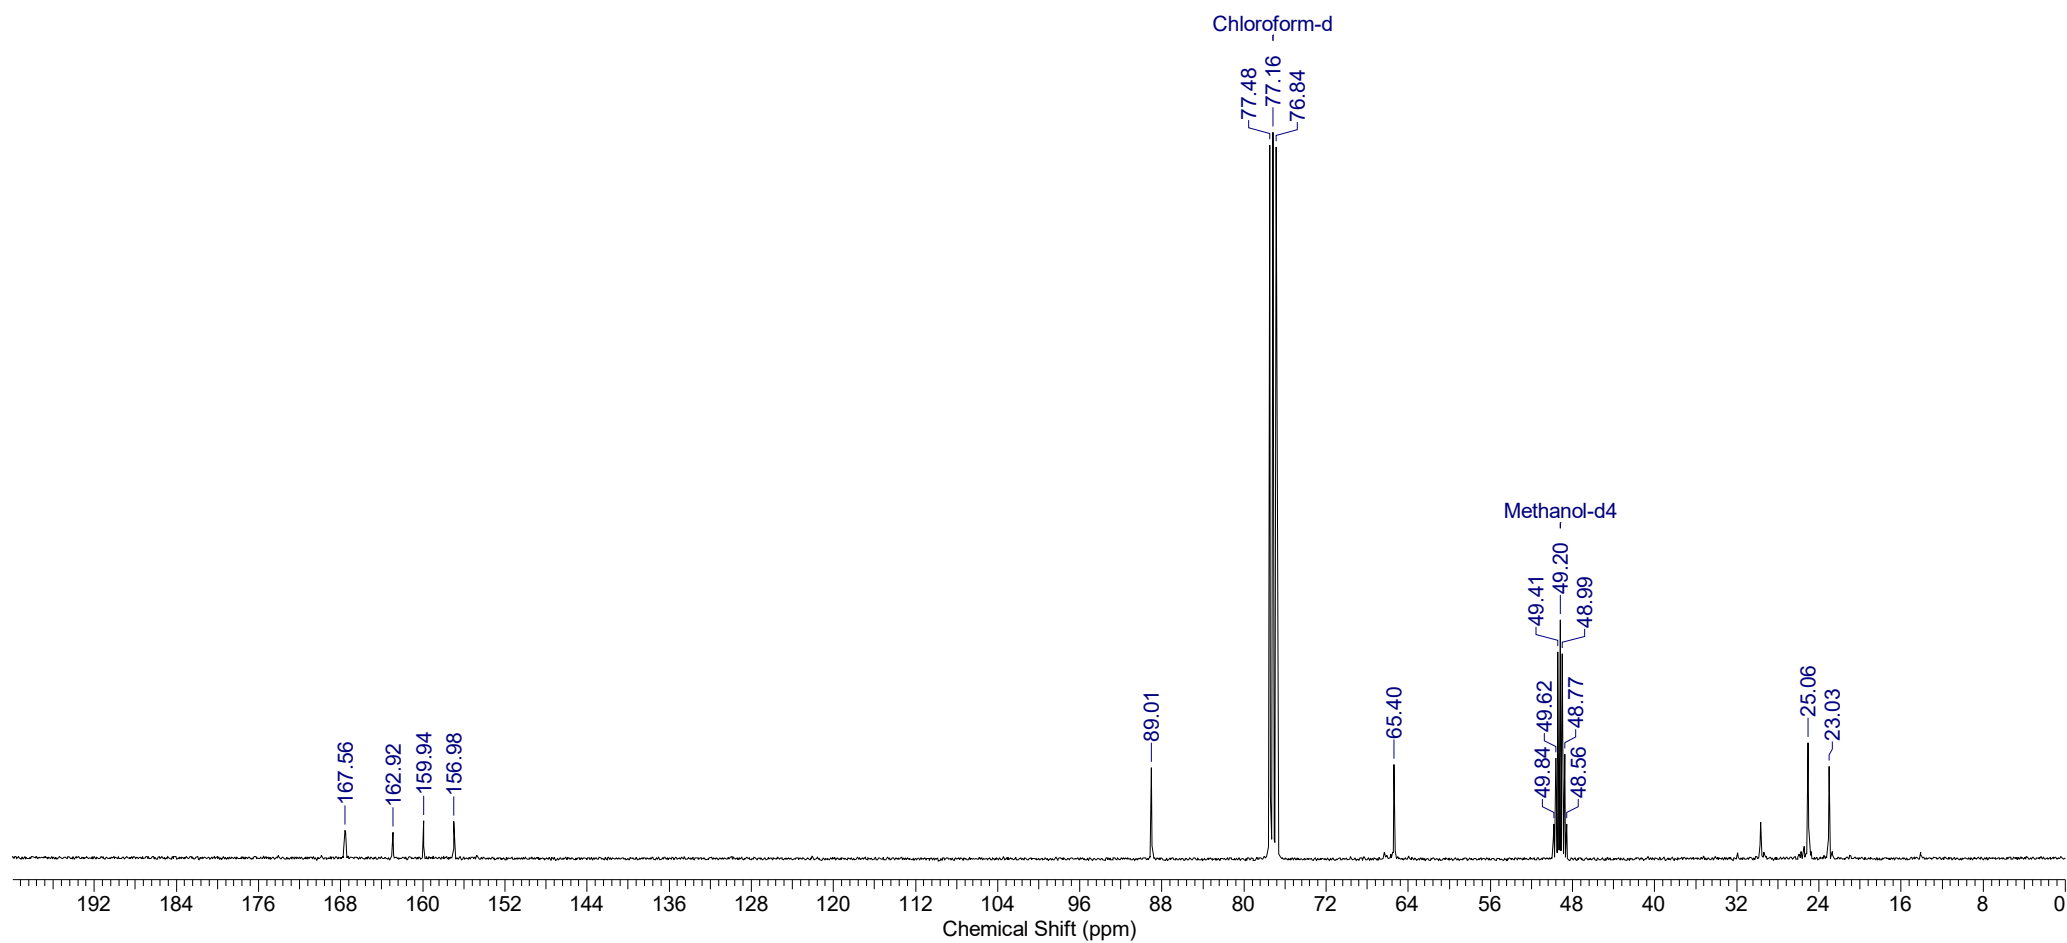

Butane-1,4-diyl bis(5-acetamidoisoxazole-3-carboxylate), **7** (HMBC)

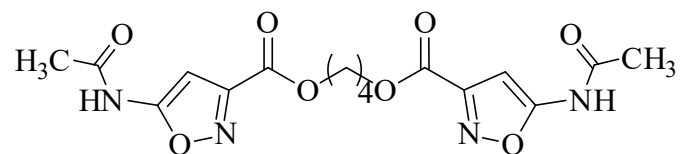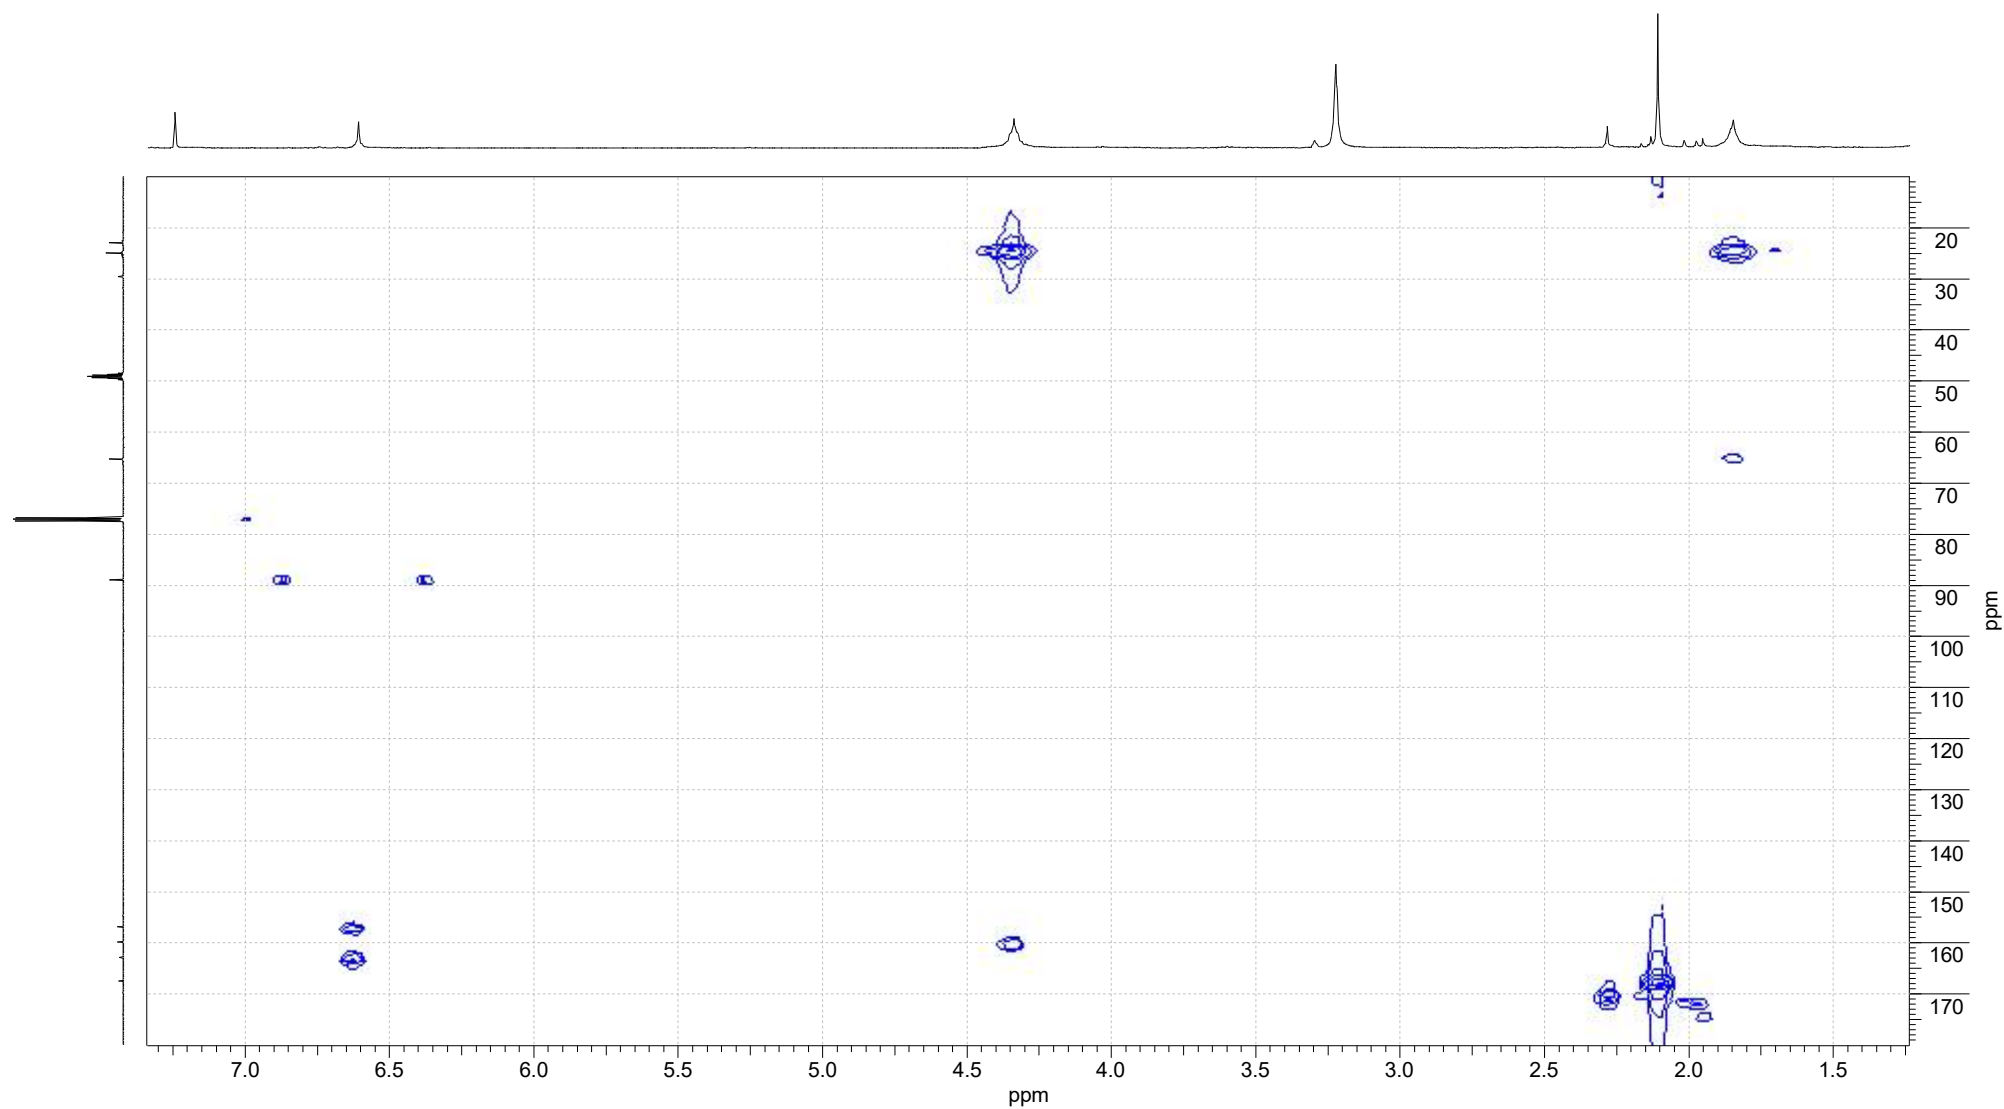

## 2. X-ray Diffraction Analysis

Single crystals suitable for X-ray diffraction were obtained by slow evaporation of the solvent from a chloroform solution of **3c**. Crystal data collection and refinement parameters of **3c** are summarized in Table S1. Intensity data were collected at 295 K on a Stoe STADI VARI diffractometer using focusing mirrors monochromated Cu K $\alpha$  radiation,  $\lambda = 1.54186$  Å. The data were corrected for decay, Lorentz, and polarization effects as well as absorption and beam corrections based on the multi-scan technique. The structures were solved by a combination of direct methods in *SHELXS-97* and the difference Fourier technique, and refined by full-matrix least-squares procedures (*SHELXL-97*). Non hydrogen atoms were refined with anisotropic displacement parameters. The H-atoms were either located or calculated and subsequently treated with a riding model.

**Table S1.** Crystallographic data and structure refinement results of **3c**.

|                                                                              | <b>3c</b>                                                      |
|------------------------------------------------------------------------------|----------------------------------------------------------------|
| Empirical formula                                                            | C <sub>12</sub> H <sub>10</sub> N <sub>4</sub> O <sub>10</sub> |
| Formula weight                                                               | 370.24                                                         |
| Temp, K                                                                      | 295(2)                                                         |
| Crystal system                                                               | monoclinic                                                     |
| Space group                                                                  | <i>P</i> 2 <sub>1</sub>                                        |
| <i>a</i> , Å                                                                 | 9.000(2)                                                       |
| <i>b</i> , Å                                                                 | 9.1293(14)                                                     |
| <i>c</i> , Å                                                                 | 19.424(4)                                                      |
| $\alpha$ , (°)                                                               | 90                                                             |
| $\beta$ , (°)                                                                | 92.197(18)                                                     |
| $\gamma$ , (°)                                                               | 90                                                             |
| Volume, Å <sup>3</sup>                                                       | 1594.8(5)                                                      |
| <i>Z</i>                                                                     | 4                                                              |
| <i>d</i> <sub>calc</sub> , g·cm <sup>-3</sup>                                | 1.542                                                          |
| $\lambda$ , Å                                                                | 1.54186                                                        |
| $\mu$ , mm <sup>-1</sup>                                                     | 1.208                                                          |
| No. of data collected                                                        | 4944                                                           |
| No. of unique data/ number restraints/ number refined parameters             | 4944/1/489                                                     |
| <i>R</i> <sub>int</sub>                                                      | 0.0217 (before absorption correction)                          |
| Goodness-of-fit on <i>F</i> <sup>2</sup>                                     | 0.632                                                          |
| <i>R</i> <sub>1</sub> , w <i>R</i> <sub>2</sub> ( <i>I</i> > 2 ( <i>I</i> )) | 0.0416, 0.0578                                                 |
| <i>R</i> <sub>1</sub> , w <i>R</i> <sub>2</sub> (all data)                   | 0.1244, 0.0736                                                 |
